# Supplementary material for: Identification of scavenger receptor B1 as the airway microfold cell receptor for Mycobacterium tuberculosis
Source: eLife. 2020 Mar 5;9:e52551. doi: 10.7554/eLife.52551 (PMC7065847; doi:10.7554/eLife.52551)
Supplement: Supplementary file 1. — Genomic DNA from the indicated strains was sequenced and variants identified by comparison to the Mtb Erdman reference genome. [file elife-52551-supp1.xls]

## Sheet: Sheet1
				WT					EccD1_KO					EsxA_KO
Chromosome	Position	Reference base	Alternate base	Genotype	Depth	Reference base depth	Alternate base depth	Variant allele frequency	Genotype	Depth	Reference base depth	Alternate base depth	Variant allele frequency	Genotype	Depth	Reference base depth	Alternate base depth	Variant allele frequency	Gene name	Region type	Mutation class	Strand	Splice distance	Transcript ID	Protein ID	Transcript variation nomenclature	Protein variation nomenclature
NC_020559.1	334047	C	A	1	87	0	85	0.977011	1	61	0	61	1	1	56	0	55	0.982143		non_coding_exon		-	-1295	ERDMAN_RS01470		r.1517G>T
NC_020559.1	334050	T	TGC	1	87	0	85	0.977011	1	64	0	60	0.9375	1	60	0	55	0.916667		non_coding_exon		-	-1298	ERDMAN_RS01470		r.1513_1514insGC
NC_020559.1	334063	G	T	1	171	0	171	1	1	115	0	115	1	1	136	0	135	0.992647		non_coding_exon		-	-1311	ERDMAN_RS01470		r.1501C>A
NC_020559.1	334090	CG	C	1	189	0	184	0.973545	1	118	0	116	0.983051	1	160	0	156	0.975		non_coding_exon		-	-1339	ERDMAN_RS01470		r.1472C[1]
NC_020559.1	335881	C	G	1	82	29	53	0.646341	1	116	41	75	0.646552	1	95	32	63	0.663158		non_coding_exon		-	-55	ERDMAN_RS22150		r.168G>C
NC_020559.1	335887	C	G	1	78	29	49	0.628205	1	116	43	73	0.62931	1	88	32	55	0.625		non_coding_exon		-	-61	ERDMAN_RS22150		r.162G>C
NC_020559.1	335890	C	T	1	75	28	47	0.626667	1	116	44	72	0.62069	1	88	34	53	0.602273		non_coding_exon		-	-64	ERDMAN_RS22150		r.159G>A
NC_020559.1	335998	A	G	1	108	26	82	0.759259	1	122	28	94	0.770492	1	89	28	61	0.685393		non_coding_exon		-	51	ERDMAN_RS22150		r.51T>C
NC_020559.1	336046	GC	G	1	84	0	81	0.964286	1	92	0	91	0.98913	1	65	0	61	0.938462		non_coding_exon	junction	-	0	ERDMAN_RS22150
NC_020559.1	336143	T	C	1	50	0	47	0.94	1	63	0	63	1	1	63	0	63	1
NC_020559.1	336161	A	C	1	51	0	50	0.980392	1	65	0	65	1	1	54	0	54	1
NC_020559.1	336314	T	C	1	39	0	39	1	1	49	0	49	1	1	42	0	42	1
NC_020559.1	336345	G	C	1	43	1	42	0.976744	1	46	0	46	1	1	46	3	43	0.934783
NC_020559.1	336354	G	C	1	49	0	49	1	1	47	0	47	1	1	50	0	50	1		non_coding_exon		+	9	ERDMAN_RS20865		r.9G>C
NC_020559.1	336380	A	G	1	41	1	40	0.97561	1	36	0	36	1	1	40	0	40	1		non_coding_exon		+	35	ERDMAN_RS20865		r.35A>G
NC_020559.1	336516	G	C	1	80	0	80	1	1	85	0	85	1	1	90	0	90	1		non_coding_exon		+	-151	ERDMAN_RS20865		r.171G>C
NC_020559.1	336528	T	C	1	84	0	83	0.988095	1	77	0	77	1	1	90	0	90	1		non_coding_exon		+	-139	ERDMAN_RS20865		r.183T>C
NC_020559.1	336549	T	G	1	71	0	71	1	1	69	0	69	1	1	81	0	81	1		non_coding_exon		+	-118	ERDMAN_RS20865		r.204T>G
NC_020559.1	336565	T	C	1	70	0	70	1	1	68	0	67	0.985294	1	73	0	73	1		non_coding_exon		+	-102	ERDMAN_RS20865		r.220T>C
NC_020559.1	336566	C	G	1	70	0	70	1	1	68	4	64	0.941176	1	74	1	73	0.986486		non_coding_exon		+	-101	ERDMAN_RS20865		r.221C>G
NC_020559.1	336574	T	G	1	75	0	75	1	1	77	1	76	0.987013	1	80	0	80	1		non_coding_exon		+	-93	ERDMAN_RS20865		r.229T>G
NC_020559.1	336613	T	G	1	61	2	59	0.967213	1	66	5	61	0.924242	1	76	7	69	0.907895		non_coding_exon		+	-54	ERDMAN_RS20865		r.268T>G
NC_020559.1	336934	C	G	1	54	0	54	1	1	46	1	45	0.978261	1	56	0	55	0.982143		CDS	silent	-	-181	ERDMAN_RS01485	WP_015456116.1	c.2520G>C	p.=
NC_020559.1	338367	T	C	1	71	1	69	0.971831	1	56	0	55	0.982143	1	79	0	79	1		CDS	missense	-	1087	ERDMAN_RS01485	WP_015456116.1	c.1087A>G	p.Ser363Gly
NC_020559.1	338368	C	T	1	70	0	69	0.985714	1	56	0	56	1	1	79	0	79	1		CDS	missense	-	1086	ERDMAN_RS01485	WP_015456116.1	c.1086G>A	p.Met362Ile
NC_020559.1	338673	T	C	1	39	0	39	1	1	30	1	29	0.966667	1	35	0	35	1		CDS	missense	-	781	ERDMAN_RS01485	WP_015456116.1	c.781A>G	p.Ser261Gly
NC_020559.1	338757	G	C	1	63	3	60	0.952381	1	41	2	39	0.95122	1	45	2	43	0.955556		CDS	missense	-	697	ERDMAN_RS01485	WP_015456116.1	c.697C>G	p.Pro233Ala
NC_020559.1	339364	C	T	1	236	114	118	0.5	1	226	119	102	0.451327	0	270	145	115	0.425926		CDS	silent	-	90	ERDMAN_RS01485	WP_015456116.1	c.90G>A	p.=
NC_020559.1	339370	G	T	1	233	115	116	0.497854	0	230	125	104	0.452174	0	272	154	117	0.430147		CDS	silent	-	84	ERDMAN_RS01485	WP_015456116.1	c.84C>A	p.=
NC_020559.1	339377	G	C	1	237	124	113	0.476793	0	232	132	100	0.431034	0	262	154	108	0.412214		CDS	missense	-	77	ERDMAN_RS01485	WP_015456116.1	c.77C>G	p.Ala26Gly
NC_020559.1	339378	C	T	1	238	121	114	0.478992	0	233	131	99	0.424893	0	261	153	108	0.413793		CDS	missense	-	76	ERDMAN_RS01485	WP_015456116.1	c.76G>A	p.Ala26Thr
NC_020559.1	339388	C	T	1	260	137	122	0.469231	1	262	159	103	0.39313	0	301	182	119	0.395349		CDS	silent	-	66	ERDMAN_RS01485	WP_015456116.1	c.66G>A	p.=
NC_020559.1	339389	T	C	1	260	135	122	0.469231	1	260	156	102	0.392308	0	301	181	119	0.395349		CDS	missense	-	65	ERDMAN_RS01485	WP_015456116.1	c.65A>G	p.Glu22Gly
NC_020559.1	339400	T	C	1	339	168	169	0.498525	0	320	170	147	0.459375	0	351	196	155	0.441595		CDS	silent	-	54	ERDMAN_RS01485	WP_015456116.1	c.54A>G	p.=
NC_020559.1	340850	A	G	1	47	0	42	0.893617	1	44	0	43	0.977273	1	67	0	65	0.970149		CDS	silent	+	-505	ERDMAN_RS01490	WP_010950374.1	c.1107A>G	p.=
NC_020559.1	357165	T	TCCTGCCGA	1	171	0	147	0.859649	1	166	0	151	0.909639	1	168	0	149	0.886905	eccE3	non_coding_exon		+	-78	ERDMAN_RS01550		r.911_912insCGACCTGC
NC_020559.1	362389	C	CG	1	71	0	69	0.971831	1	74	0	67	0.905405	1	63	0	59	0.936508		non_coding_exon		+	685	ERDMAN_RS01575		r.685G[4]
NC_020559.1	364993	G	GA	1	239	0	233	0.974895	1	220	0	210	0.954545	1	274	0	264	0.963504
NC_020559.1	401970	T	C	1	77	0	77	1	1	104	0	104	1	1	98	0	98	1		CDS	silent	+	-103	ERDMAN_RS01770	WP_003900122.1	c.1434T>C	p.=
NC_020559.1	402745	G	GC	1	270	0	265	0.981481	1	223	0	217	0.973094	1	267	0	256	0.958801		non_coding_exon		-	-505	ERDMAN_RS01775		r.784G[3]
NC_020559.1	610271	T	C	1	327	0	325	0.993884	1	255	0	255	1	1	335	0	335	1
NC_020559.1	674401	A	G	1	42	0	41	0.97619	1	24	0	24	1	1	41	0	41	1		non_coding_exon		-	-728	ERDMAN_RS03030		r.2476T>C
NC_020559.1	674409	A	T	1	44	0	42	0.954545	1	26	0	26	1	1	40	0	40	1		non_coding_exon		-	-736	ERDMAN_RS03030		r.2468T>A
NC_020559.1	674416	CA	C	1	37	0	35	0.945946	1	27	0	25	0.925926	1	41	0	40	0.97561		non_coding_exon		-	-744	ERDMAN_RS03030		r.2460delT
NC_020559.1	674512	T	TG	1	39	0	36	0.923077	1	35	0	29	0.828571	1	40	0	38	0.95		non_coding_exon		-	-840	ERDMAN_RS03030		r.2364dupC
NC_020559.1	674553	CA	C	1	40	0	34	0.85	1	36	0	33	0.916667	1	48	0	44	0.916667		non_coding_exon		-	-881	ERDMAN_RS03030		r.2321T[2]
NC_020559.1	739277	A	G	1	433	0	431	0.995381	1	338	0	335	0.991124	1	426	0	425	0.997653		CDS	silent	-	-16	ERDMAN_RS03400	WP_003900985.1	c.849T>C	p.=
NC_020559.1	838883	C	G	1	6	0	6	1	1	3	0	3	1	1	3	0	3	1		non_coding_exon		+	-777	ERDMAN_RS03930		r.1577C>G
NC_020559.1	838894	GT	G	1	7	0	7	1	1	3	0	3	1	1	3	0	3	1		non_coding_exon		+	-765	ERDMAN_RS03930		r.1589delT
NC_020559.1	838897	A	G	1	7	0	7	1	1	3	0	3	1	1	3	0	3	1		non_coding_exon		+	-763	ERDMAN_RS03930		r.1591A>G
NC_020559.1	838898	T	G	1	7	0	7	1	1	4	0	4	1	1	10	0	10	1		non_coding_exon		+	-762	ERDMAN_RS03930		r.1592T>G
NC_020559.1	838913	C	G	1	30	0	30	1	1	20	0	20	1	1	33	0	33	1		non_coding_exon		+	-747	ERDMAN_RS03930		r.1607C>G
NC_020559.1	838915	C	G	1	30	0	30	1	1	20	0	20	1	1	33	0	33	1		non_coding_exon		+	-745	ERDMAN_RS03930		r.1609C>G
NC_020559.1	838923	T	G	1	32	0	32	1	1	21	0	21	1	1	33	0	33	1		non_coding_exon		+	-737	ERDMAN_RS03930		r.1617T>G
NC_020559.1	838927	C	G	1	32	0	32	1	1	21	0	20	0.952381	1	33	0	33	1		non_coding_exon		+	-733	ERDMAN_RS03930		r.1621C>G
NC_020559.1	838928	A	G	1	32	0	32	1	1	21	0	21	1	1	33	0	33	1		non_coding_exon		+	-732	ERDMAN_RS03930		r.1622A>G
NC_020559.1	838936	C	G	1	41	0	41	1	1	26	0	25	0.961538	1	42	2	40	0.952381		non_coding_exon		+	-724	ERDMAN_RS03930		r.1630C>G
NC_020559.1	851633	G	T	1	371	1	369	0.994609	1	299	0	299	1	1	298	1	296	0.993289		CDS	missense	+	124	ERDMAN_RS04005	WP_015456166.1	c.124G>T	p.Val42Phe
NC_020559.1	854154	G	GC	1	291	5	254	0.872852	1	277	4	247	0.891697	1	348	4	314	0.902299		CDS	frameshift	-	10	ERDMAN_RS04015	WP_003918125.1	c.10G[8]	p.Ala6Glyfs*20
NC_020559.1	907305	A	ACT	1	14	0	13	0.928571	1	21	0	20	0.952381	1	19	0	17	0.894737		non_coding_exon		-	110	ERDMAN_RS04300		r.110_111insAG
NC_020559.1	924840	T	C	1	70	1	66	0.942857	1	53	0	49	0.924528	1	67	0	65	0.970149		non_coding_exon		+	-310	ERDMAN_RS04415		r.519T>C
NC_020559.1	926618	T	C	1	97	0	39	0.402062	1	51	0	22	0.431373	1	89	0	46	0.516854		non_coding_exon		-	-1153	ERDMAN_RS04425		r.1302A>G
NC_020559.1	926695	A	C	1	51	0	50	0.980392	1	39	0	38	0.974359	1	59	1	58	0.983051		non_coding_exon		-	1225	ERDMAN_RS04425		r.1225T>G
NC_020559.1	926696	AG	A	1	51	0	50	0.980392	1	39	0	38	0.974359	1	56	0	56	1		non_coding_exon		-	1223	ERDMAN_RS04425		r.1223delC
NC_020559.1	927238	G	GC	1	82	0	79	0.963415	1	94	0	91	0.968085	1	100	0	92	0.92		non_coding_exon		-	679	ERDMAN_RS04425		r.679G[4]
NC_020559.1	974392	T	TG	1	298	5	257	0.862416	1	233	3	197	0.845494	1	297	8	256	0.861953		CDS	frameshift	-	-40	ERDMAN_RS04650	WP_003906460.1	c.1298C[9]	p.Lys436Glnfs*4
NC_020559.1	1090425	T	G	1	74	0	71	0.959459	1	53	0	53	1	1	67	0	64	0.955224		non_coding_exon		+	1200	ERDMAN_RS20755		r.1200T>G
NC_020559.1	1094660	T	G	1	19	0	19	1	1	17	0	17	1	1	19	0	18	0.947368		non_coding_exon		-	-336	ERDMAN_RS21060		r.845A>C
NC_020559.1	1094664	T	C	1	20	0	19	0.95	1	19	0	19	1	1	22	0	22	1		non_coding_exon		-	-340	ERDMAN_RS21060		r.841A>G
NC_020559.1	1094691	CT	C	1	34	0	29	0.852941	1	31	0	30	0.967742	1	31	0	28	0.903226		non_coding_exon		-	-368	ERDMAN_RS21060		r.813delA
NC_020559.1	1094750	CT	C	1	79	0	79	1	1	47	0	47	1	1	58	0	58	1		non_coding_exon		-	-427	ERDMAN_RS21060		r.754delA
NC_020559.1	1095187	CA	C	1	14	0	13	0.928571	1	24	0	18	0.75	1	15	0	13	0.866667		non_coding_exon		-	315	ERDMAN_RS21060		r.315T[2]
NC_020559.1	1095265	A	C	1	21	0	21	1	1	19	0	19	1	1	26	0	26	1		non_coding_exon		-	240	ERDMAN_RS21060		r.240T>G
NC_020559.1	1095270	GA	G	1	27	0	22	0.814815	1	24	0	20	0.833333	1	28	0	26	0.928571		non_coding_exon		-	234	ERDMAN_RS21060		r.234delT
NC_020559.1	1103626	C	CT	1	613	2	591	0.964111	1	538	2	528	0.981413	1	697	1	676	0.969871		non_coding_exon		+	-530	ERDMAN_RS05245		r.2033T[7]
NC_020559.1	1132828	GC	G	1	209	0	203	0.971292	1	191	0	186	0.973822	1	217	1	211	0.97235		non_coding_exon		-	132	ERDMAN_RS22220		r.132G[1]
NC_020559.1	1187612	C	T	1	78	0	76	0.974359	1	56	0	53	0.946429	1	63	0	62	0.984127		non_coding_exon		-	-137	ERDMAN_RS21130		r.1870G>A
NC_020559.1	1187660	C	T	1	82	10	69	0.841463	1	52	9	42	0.807692	1	64	11	52	0.8125		non_coding_exon		-	-185	ERDMAN_RS21130		r.1822G>A
NC_020559.1	1188117	C	CG	1	67	0	63	0.940299	1	72	0	65	0.902778	1	58	0	51	0.87931		non_coding_exon		-	-642	ERDMAN_RS21130		r.1364_1365insC
NC_020559.1	1188138	G	A	1	66	0	66	1	1	75	0	75	1	1	66	0	65	0.984848		non_coding_exon		-	-663	ERDMAN_RS21130		r.1344C>T
NC_020559.1	1188142	G	C	1	71	0	71	1	1	81	0	80	0.987654	1	74	0	74	1		non_coding_exon		-	-667	ERDMAN_RS21130		r.1340C>G
NC_020559.1	1188187	CG	C	1	74	0	74	1	1	81	0	81	1	1	63	1	61	0.968254		non_coding_exon		-	-713	ERDMAN_RS21130		r.1294delC
NC_020559.1	1188196	G	C	1	69	0	69	1	1	80	1	78	0.975	1	62	0	62	1		non_coding_exon		-	-721	ERDMAN_RS21130		r.1286C>G
NC_020559.1	1188544	A	AC	1	44	0	40	0.909091	1	29	0	28	0.965517	1	37	0	36	0.972973		non_coding_exon		-	936	ERDMAN_RS21130		r.936G[3]
NC_020559.1	1188661	A	G	1	42	21	19	0.452381	1	25	15	10	0.4	0	39	23	16	0.410256		non_coding_exon		-	821	ERDMAN_RS21130		r.821T>C
NC_020559.1	1188668	G	A	1	43	22	20	0.465116	1	26	15	11	0.423077	0	40	25	14	0.35		non_coding_exon		-	814	ERDMAN_RS21130		r.814C>T
NC_020559.1	1188694	GC	G	1	40	4	35	0.875	1	38	1	37	0.973684	1	37	1	36	0.972973		non_coding_exon		-	785	ERDMAN_RS21130		r.785G[2]
NC_020559.1	1188829	T	A	0	57	32	25	0.438596	0	53	35	18	0.339623	1	47	22	24	0.510638		non_coding_exon		-	653	ERDMAN_RS21130		r.653A>T
NC_020559.1	1188893	GC	G	1	69	5	64	0.927536	1	68	1	67	0.985294	1	79	0	79	1		non_coding_exon		-	586	ERDMAN_RS21130		r.586G[2]
NC_020559.1	1189074	A	G	1	74	6	68	0.918919	1	71	16	55	0.774648	1	90	16	74	0.822222		non_coding_exon		-	408	ERDMAN_RS21130		r.408T>C
NC_020559.1	1189150	A	C	1	157	3	154	0.980892	1	143	3	140	0.979021	1	199	7	192	0.964824		non_coding_exon		-	332	ERDMAN_RS21130		r.332T>G
NC_020559.1	1210869	A	G	1	44	0	44	1	1	32	0	32	1	1	74	0	73	0.986486		non_coding_exon		+	832	ERDMAN_RS05805		r.832A>G
NC_020559.1	1210881	A	G	1	56	0	56	1	1	51	0	51	1	1	84	0	84	1		non_coding_exon		+	844	ERDMAN_RS05805		r.844A>G
NC_020559.1	1210891	C	G	1	70	0	70	1	1	61	1	60	0.983607	1	94	0	94	1		non_coding_exon		+	854	ERDMAN_RS05805		r.854C>G
NC_020559.1	1211326	G	T	1	83	2	81	0.975904	1	64	3	60	0.9375	1	87	0	87	1		non_coding_exon		+	-1052	ERDMAN_RS05805		r.1289G>T
NC_020559.1	1211444	G	C	1	41	6	35	0.853659	1	45	4	41	0.911111	1	48	4	44	0.916667		non_coding_exon		+	-934	ERDMAN_RS05805		r.1407G>C
NC_020559.1	1215423	CAT	C	1	133	0	131	0.984962	1	120	0	119	0.991667	1	130	0	130	1		non_coding_exon		+	442	ERDMAN_RS05840		r.442_443delAT
NC_020559.1	1215673	T	A	1	111	0	109	0.981982	1	100	0	100	1	1	125	0	125	1		non_coding_exon		+	691	ERDMAN_RS05840		r.691T>A
NC_020559.1	1216234	A	C	1	35	0	35	1	1	31	0	31	1	1	22	0	22	1		non_coding_exon		+	1252	ERDMAN_RS05840		r.1252A>C
NC_020559.1	1216265	T	C	1	21	0	20	0.952381	1	18	0	17	0.944444	1	13	0	13	1		non_coding_exon		+	-1282	ERDMAN_RS05840		r.1283T>C
NC_020559.1	1216285	A	G	1	21	0	21	1	1	18	0	18	1	1	11	0	11	1		non_coding_exon		+	-1262	ERDMAN_RS05840		r.1303A>G
NC_020559.1	1216385	C	G	1	20	0	20	1	1	19	0	19	1	1	12	0	12	1		non_coding_exon		+	-1162	ERDMAN_RS05840		r.1403C>G
NC_020559.1	1216397	T	C	1	21	0	21	1	1	15	0	15	1	1	11	0	11	1		non_coding_exon		+	-1150	ERDMAN_RS05840		r.1415T>C
NC_020559.1	1216400	T	G	1	21	0	21	1	1	15	0	15	1	1	10	0	10	1		non_coding_exon		+	-1147	ERDMAN_RS05840		r.1418T>G
NC_020559.1	1216402	A	C	1	21	0	21	1	1	15	0	15	1	1	10	0	10	1		non_coding_exon		+	-1145	ERDMAN_RS05840		r.1420A>C
NC_020559.1	1216414	G	C	1	24	0	24	1	1	18	0	18	1	1	15	0	15	1		non_coding_exon		+	-1133	ERDMAN_RS05840		r.1432G>C
NC_020559.1	1216555	T	C	1	39	0	39	1	1	27	0	27	1	1	22	0	22	1		non_coding_exon		+	-992	ERDMAN_RS05840		r.1573T>C
NC_020559.1	1216685	G	C	1	62	0	62	1	1	41	0	41	1	1	56	0	56	1		non_coding_exon		+	-862	ERDMAN_RS05840		r.1703G>C
NC_020559.1	1216806	G	A	1	70	1	69	0.985714	1	59	0	57	0.966102	1	81	0	81	1		non_coding_exon		+	-741	ERDMAN_RS05840		r.1824G>A
NC_020559.1	1277157	T	C	1	46	0	46	1	1	50	0	50	1	1	38	0	38	1		non_coding_exon		+	-181	ERDMAN_RS21175		r.748T>C
NC_020559.1	1277206	A	C	1	57	0	57	1	1	58	0	58	1	1	49	0	49	1		non_coding_exon		+	-132	ERDMAN_RS21175		r.797A>C
NC_020559.1	1403391	G	T	1	266	0	264	0.992481	1	214	0	214	1	1	247	0	246	0.995951		CDS	silent	-	-157	ERDMAN_RS06695	WP_003406358.1	c.1212C>A	p.=
NC_020559.1	1479569	C	G	1	168	1	166	0.988095	1	157	0	155	0.987261	1	173	0	173	1		CDS	missense	-	-102	ERDMAN_RS07040	WP_015456240.1	c.1498G>C	p.Val500Leu
NC_020559.1	1479577	C	G	1	158	0	158	1	1	140	0	139	0.992857	1	161	0	161	1		CDS	missense	-	-110	ERDMAN_RS07040	WP_015456240.1	c.1490G>C	p.Trp497Ser
NC_020559.1	1479587	A	G	1	138	0	138	1	1	123	0	123	1	1	145	0	144	0.993103		CDS	silent	-	-120	ERDMAN_RS07040	WP_015456240.1	c.1480T>C	p.=
NC_020559.1	1479776	A	C	1	21	0	21	1	1	32	0	32	1	1	21	1	19	0.904762		CDS	missense	-	-309	ERDMAN_RS07040	WP_015456240.1	c.1291T>G	p.Ser431Ala
NC_020559.1	1527367	C	T	0	318	316	1	0.00314465	0	259	259	0	0	1	318	1	316	0.993711		CDS	missense	+	-500	ERDMAN_RS07250	WP_003898842.1	c.524C>T	p.Thr175Ile
NC_020559.1	1566451	C	G	1	102	1	101	0.990196	1	88	0	88	1	1	116	0	116	1		non_coding_exon		-	-187	ERDMAN_RS07430		r.448G>C
NC_020559.1	1627068	A	G	1	43	0	43	1	1	48	0	48	1	1	31	0	31	1		CDS	silent	-	349	ERDMAN_RS07715	WP_044519833.1	c.349T>C	p.=
NC_020559.1	1630123	T	TC	1	46	0	45	0.978261	1	47	0	45	0.957447	1	51	0	49	0.960784		non_coding_exon		-	882	ERDMAN_RS07725		r.882dupG
NC_020559.1	1630345	T	C	1	27	0	27	1	1	26	0	26	1	1	17	0	17	1		non_coding_exon		-	661	ERDMAN_RS07725		r.661A>G
NC_020559.1	1648667	G	GC	1	125	1	120	0.96	1	91	0	88	0.967033	1	88	0	85	0.965909		non_coding_exon		-	-230	ERDMAN_RS07805		r.882_883insG
NC_020559.1	1772277	A	G	1	65	0	65	1	1	37	0	37	1	1	52	0	52	1		CDS	silent	-	-253	ERDMAN_RS08350	WP_015456276.1	c.705T>C	p.=
NC_020559.1	1772297	T	G	1	52	1	51	0.980769	1	31	0	31	1	1	32	0	32	1		CDS	missense	-	-273	ERDMAN_RS08350	WP_015456276.1	c.685A>C	p.Thr229Pro
NC_020559.1	1772322	A	G	1	32	0	32	1	1	20	0	20	1	1	21	0	21	1		CDS	silent	-	-298	ERDMAN_RS08350	WP_015456276.1	c.660T>C	p.=
NC_020559.1	1982050	GA	G	1	88	1	81	0.920455	1	94	1	84	0.893617	1	88	2	75	0.852273		non_coding_exon		-	-617	ERDMAN_RS20720		r.2130delT
NC_020559.1	1983160	CG	C	1	98	2	91	0.928571	1	95	0	91	0.957895	1	96	1	94	0.979167		non_coding_exon		-	1018	ERDMAN_RS20720		r.1018C[2]
NC_020559.1	1983188	G	C	1	102	0	102	1	1	96	3	93	0.96875	1	109	1	108	0.990826		non_coding_exon		-	993	ERDMAN_RS20720		r.993C>G
NC_020559.1	1983189	C	G	1	102	1	101	0.990196	1	96	4	92	0.958333	1	107	2	105	0.981308		non_coding_exon		-	992	ERDMAN_RS20720		r.992G>C
NC_020559.1	1983228	G	GC	1	85	0	71	0.835294	1	83	0	73	0.879518	1	89	0	83	0.932584		non_coding_exon		-	952	ERDMAN_RS20720		r.952dupG
NC_020559.1	2045871	G	GC	1	235	0	230	0.978723	1	216	1	212	0.981481	1	234	0	228	0.974359		non_coding_exon		-	-512	ERDMAN_RS09525		r.690G[3]
NC_020559.1	2052777	G	C	1	103	7	96	0.932039	1	71	1	70	0.985915	1	77	5	72	0.935065		non_coding_exon		-	-474	ERDMAN_RS09555		r.717C>G
NC_020559.1	2052834	T	TG	1	178	1	165	0.926966	1	154	5	145	0.941558	1	157	2	151	0.961783		non_coding_exon		-	-531	ERDMAN_RS09555		r.659_660insC
NC_020559.1	2176914	A	G	1	199	0	199	1	1	152	0	152	1	1	155	0	155	1		CDS	silent	-	348	ERDMAN_RS10130	WP_003900438.1	c.348T>C	p.=
NC_020559.1	2188202	A	G	1	40	0	39	0.975	1	42	0	41	0.97619	1	58	0	58	1		CDS	missense	+	-225	ERDMAN_RS10185	WP_044519839.1	c.1141A>G	p.Ile381Val
NC_020559.1	2188315	T	C	1	97	2	93	0.958763	1	63	0	62	0.984127	1	95	0	95	1		CDS	silent	+	-112	ERDMAN_RS10185	WP_044519839.1	c.1254T>C	p.=
NC_020559.1	2291402	G	A	1	155	0	155	1	1	141	0	140	0.992908	1	168	0	168	1		CDS	missense	-	-798	ERDMAN_RS10760	WP_015456344.1	c.11659C>T	p.Arg3887Trp
NC_020559.1	2291440	T	G	1	101	0	101	1	1	87	0	87	1	1	118	0	118	1		CDS	missense	-	-836	ERDMAN_RS10760	WP_015456344.1	c.11621A>C	p.Asp3874Ala
NC_020559.1	2291519	T	C	1	23	0	23	1	1	32	0	29	0.90625	1	38	0	37	0.973684		CDS	missense	-	-915	ERDMAN_RS10760	WP_015456344.1	c.11542A>G	p.Arg3848Gly
NC_020559.1	2291526	T	C	1	26	0	26	1	1	30	0	29	0.966667	1	38	0	38	1		CDS	silent	-	-922	ERDMAN_RS10760	WP_015456344.1	c.11535A>G	p.=
NC_020559.1	2416785	C	G	1	98	0	98	1	1	121	0	121	1	1	105	2	103	0.980952		CDS	missense	-	-540	ERDMAN_RS11375	WP_015456356.1	c.835G>C	p.Val279Leu
NC_020559.1	2430971	G	T	1	92	0	92	1	1	112	0	111	0.991071	1	114	0	114	1		CDS	missense	-	-267	ERDMAN_RS11440	WP_044519843.1	c.400C>A	p.Pro134Thr
NC_020559.1	2431322	T	C	1	240	0	240	1	1	216	0	216	1	1	242	0	242	1		CDS	missense	-	49	ERDMAN_RS11440	WP_044519843.1	c.49A>G	p.Asn17Asp
NC_020559.1	2431322	T	C	1	240	0	240	1	1	216	0	216	1	1	242	0	242	1		CDS	silent	-	-19	ERDMAN_RS21505	WP_003905774.1	c.165A>G	p.=
NC_020559.1	2443440	G	T	1	206	0	206	1	1	186	1	185	0.994624	1	187	0	187	1		CDS	missense	-	4	ERDMAN_RS11500	WP_003411371.1	c.4C>A	p.Arg2Ser
NC_020559.1	2443997	T	TG	1	190	0	180	0.947368	1	147	0	139	0.945578	1	159	0	151	0.949686		non_coding_exon		-	-461	ERDMAN_RS11505		r.695C[4]
NC_020559.1	2623906	G	GA	1	329	1	320	0.972644	1	283	0	278	0.982332	1	439	0	431	0.981777
NC_020559.1	2682180	A	G	1	102	0	102	1	1	60	0	60	1	1	72	0	72	1		CDS	missense	+	455	ERDMAN_RS12605	WP_015456383.1	c.455A>G	p.Asn152Ser
NC_020559.1	2682209	A	G	1	86	0	85	0.988372	1	49	0	49	1	1	62	0	62	1		CDS	missense	+	484	ERDMAN_RS12605	WP_015456383.1	c.484A>G	p.Ile162Val
NC_020559.1	2683392	G	A	1	279	0	278	0.996416	1	304	0	302	0.993421	1	285	0	285	1		CDS	missense	-	500	ERDMAN_RS12610	WP_003412325.1	c.500C>T	p.Ala167Val
NC_020559.1	2751314	A	AC	1	187	0	175	0.935829	1	197	0	186	0.944162	1	215	0	208	0.967442		CDS	frameshift	+	-218	ERDMAN_RS12940	WP_003917001.1	c.1586C[5]	p.Pro531Alafs*3
NC_020559.1	2783560	GGA	G	1	26	0	26	1	1	26	0	26	1	1	25	0	24	0.96		non_coding_exon		-	-674	ERDMAN_RS13095		r.1411_1412delTC
NC_020559.1	2789199	T	TC	1	94	0	87	0.925532	1	90	0	77	0.855556	1	82	0	74	0.902439		non_coding_exon		-	-360	ERDMAN_RS13110		r.4622G[4]
NC_020559.1	2789347	G	GC	1	116	0	112	0.965517	1	104	0	102	0.980769	1	111	0	107	0.963964		non_coding_exon		-	-508	ERDMAN_RS13110		r.4476dupG
NC_020559.1	2789844	TC	T	1	83	4	72	0.86747	1	76	1	70	0.921053	1	65	7	52	0.8		non_coding_exon		-	-1005	ERDMAN_RS13110		r.3977G[2]
NC_020559.1	2792700	AC	A	1	59	0	56	0.949153	1	72	0	68	0.944444	1	68	0	63	0.926471		non_coding_exon		-	1119	ERDMAN_RS13110		r.1119G[4]
NC_020559.1	2968141	T	C	1	239	0	238	0.995816	1	198	0	196	0.989899	1	254	0	254	1		CDS	missense	-	-72	ERDMAN_RS21700	WP_003899422.1	c.319A>G	p.Ile107Val
NC_020559.1	2970495	C	G	1	25	1	24	0.96	1	22	0	22	1	1	22	0	22	1		non_coding_exon		+	-243	ERDMAN_RS14050		r.541C>G
NC_020559.1	3108909	CG	C	1	411	1	397	0.965937	1	302	1	299	0.990066	1	390	2	376	0.964103
NC_020559.1	3124695	A	C	1	103	0	103	1	1	88	0	88	1	1	90	1	89	0.988889		CDS	silent	-	48	ERDMAN_RS14890	WP_003899500.1	c.48T>G	p.=
NC_020559.1	3209370	G	GA	1	228	0	222	0.973684	1	189	0	185	0.978836	1	235	2	231	0.982979		non_coding_exon		-	808	ERDMAN_RS15330		r.808T[5]
NC_020559.1	3228325	GC	G	1	218	0	212	0.972477	1	196	1	188	0.959184	1	183	0	176	0.961749
NC_020559.1	3237065	A	AC	1	64	0	43	0.671875	1	52	0	29	0.557692	1	90	1	49	0.544444	ppsA	non_coding_exon		+	-2769	ERDMAN_RS22385		r.2858C[6]
NC_020559.1	3341982	A	G	1	173	0	173	1	1	183	0	182	0.994536	1	169	0	168	0.994083		CDS	silent	-	132	ERDMAN_RS21820	WP_003899576.1	c.132T>C	p.=
NC_020559.1	3353500	T	TC	1	160	2	151	0.94375	1	192	5	172	0.895833	1	202	5	187	0.925743		non_coding_exon		+	148	ERDMAN_RS15840		r.148C[8]
NC_020559.1	3428082	C	G	1	171	0	169	0.988304	1	195	1	193	0.989744	1	231	0	231	1		CDS	missense	-	-54	ERDMAN_RS16205	WP_015456473.1	c.775G>C	p.Ala259Pro
NC_020559.1	3501981	T	TC	1	245	0	215	0.877551	1	247	0	222	0.898785	1	238	2	221	0.928571	nuoF	non_coding_exon		+	618	ERDMAN_RS16580		r.618C[4]
NC_020559.1	3516940	A	G	1	42	0	42	1	1	48	0	48	1	1	39	0	38	0.974359		CDS	silent	-	325	ERDMAN_RS16630	WP_003902420.1	c.325T>C	p.=
NC_020559.1	3517272	G	GC	1	216	0	212	0.981481	1	206	0	198	0.961165	1	248	0	241	0.971774
NC_020559.1	3517281	T	C	1	262	1	261	0.996183	1	243	1	242	0.995885	1	284	1	283	0.996479
NC_020559.1	3675218	G	GGATC	1	145	0	138	0.951724	1	136	1	132	0.970588	1	125	0	119	0.952		CDS	frameshift	-	-376	ERDMAN_RS17390	WP_003917761.1	c.1038_1041dupGATC	p.Arg348Aspfs*127
NC_020559.1	3737467	C	T	1	101	0	101	1	1	100	0	99	0.99	1	120	0	120	1		CDS	silent	-	-2	ERDMAN_RS17625	WP_003914152.1	c.818G>A	p.=
NC_020559.1	3737467	C	T	1	101	0	101	1	1	100	0	99	0.99	1	120	0	120	1		non_coding_exon		+	24	ERDMAN_RS22465		r.24C>T
NC_020559.1	3830954	T	C	1	120	0	118	0.983333	1	126	2	124	0.984127	1	128	0	127	0.992188		CDS	missense	-	-83	ERDMAN_RS21960	WP_078450940.1	c.281A>G	p.Lys94Arg
NC_020559.1	3869046	G	C	1	174	0	174	1	1	183	0	183	1	1	184	0	184	1		non_coding_exon		+	-39	ERDMAN_RS18235		r.853G>C
NC_020559.1	3923750	T	C	1	72	16	55	0.763889	1	74	23	51	0.689189	1	66	16	50	0.757576		non_coding_exon		+	1353	ERDMAN_RS20795		r.1353T>C
NC_020559.1	3924738	AC	A	1	43	0	41	0.953488	1	40	0	37	0.925	1	52	0	49	0.942308		non_coding_exon		+	-2103	ERDMAN_RS20795		r.2342C[2]
NC_020559.1	3925591	A	ACGG	1	93	0	92	0.989247	1	74	0	68	0.918919	1	64	0	57	0.890625		non_coding_exon		+	-1250	ERDMAN_RS20795		r.3195_3197dupCGG
NC_020559.1	3925607	A	AG	1	91	0	86	0.945055	1	83	0	82	0.987952	1	59	1	57	0.966102		non_coding_exon		+	-1236	ERDMAN_RS20795		r.3211dupG
NC_020559.1	3925618	C	CG	1	81	0	65	0.802469	1	76	0	59	0.776316	0	52	0	34	0.653846		non_coding_exon		+	-1223	ERDMAN_RS20795		r.3222G[4]
NC_020559.1	3926125	C	T	0	187	91	84	0.449198	1	180	64	109	0.605556	1	190	74	107	0.563158		non_coding_exon		+	-719	ERDMAN_RS20795		r.3728C>T
NC_020559.1	3989739	A	G	1	59	0	56	0.949153	1	55	0	53	0.963636	1	57	0	55	0.964912
NC_020559.1	4001892	G	A	1	241	0	241	1	1	220	0	219	0.995455	1	234	0	234	1		CDS	silent	+	-538	ERDMAN_RS18865	WP_003419420.1	c.705G>A	p.=
NC_020559.1	4012573	G	GC	1	108	0	108	1	1	107	0	105	0.981308	1	100	0	94	0.94		non_coding_exon		-	-125	ERDMAN_RS18925		r.1626G[5]
NC_020559.1	4012880	C	CG	1	110	3	104	0.945455	1	108	1	100	0.925926	1	90	1	84	0.933333		non_coding_exon		-	-432	ERDMAN_RS18925		r.1320C[4]
NC_020559.1	4220273	C	G	1	220	0	220	1	1	225	1	224	0.995556	1	191	0	190	0.994764		CDS	silent	+	-499	ERDMAN_RS20005	WP_003900755.1	c.1434C>G	p.=
NC_020559.1	4306113	C	CA	1	268	0	264	0.985075	1	227	2	218	0.960352	1	226	0	220	0.973451		non_coding_exon		+	133	ERDMAN_RS20315		r.133A[7]
Genotype #0 means identical to reference genome
Genotype #1 means identical to alternate base
SNPs were considered signifcantly different when wild type or variant alleles were each greater than 90% of the reads
