# Supplementary material for: Identification of scavenger receptor B1 as the airway microfold cell receptor for Mycobacterium tuberculosis
Source: eLife. 2020 Mar 5;9:e52551. doi: 10.7554/eLife.52551 (PMC7065847; doi:10.7554/eLife.52551)
Supplement: Supplementary file 2. — TriCEPS-labeled transferrin or EsxA were affinity purified after binding to the surface of Caco-2 cells, and bound proteins analyzed by mass spectrometry. [file elife-52551-supp2.xls]

## Sheet: Peptides
Accession	Protein	Description	Charge	m/z	Score	Sequence	Control_1	Control_2	ESAT6_1	ESAT6_2	ESAT6_3
P02751	FINC	Fibronectin OS=Homo sapiens GN=FN1 PE=1 SV=4	2	585.23	1	YQCYCYGR	36905	24574.4	41709.9	33085.1	29934.9
P02751	FINC	Fibronectin OS=Homo sapiens GN=FN1 PE=1 SV=4	2	585.23	1	YQCYCYGR	0	0	38.4742	0	30444.3
P02751	FINC	Fibronectin OS=Homo sapiens GN=FN1 PE=1 SV=4	2	611.264	1	TFYSCTTEGR	34927.7	34978.5	48089	39848.5	43916.2
P02751	FINC	Fibronectin OS=Homo sapiens GN=FN1 PE=1 SV=4	3	355.518	1	VGDTYERPK	10941.5	9061.42	11967	12593	10165.6
P02751	FINC	Fibronectin OS=Homo sapiens GN=FN1 PE=1 SV=4	3	441.91	1	LGVRPSQGGEAPR	87.1224	65.2518	8231.66	9293.06	65175.9
P02751	FINC	Fibronectin OS=Homo sapiens GN=FN1 PE=1 SV=4	3	441.91	1	LGVRPSQGGEAPR	1628.48	179.199	29123.4	2540.68	924.815
P02751	FINC	Fibronectin OS=Homo sapiens GN=FN1 PE=1 SV=4	2	584.277	1	FTNIGPDTMR	15014.6	32222.1	43864.7	34955.8	14089.5
P02751	FINC	Fibronectin OS=Homo sapiens GN=FN1 PE=1 SV=4	2	793.832	1	WCGTTQNYDADQK	26558.9	29251.5	33451.1	31585.9	6345.19
P02751	FINC	Fibronectin OS=Homo sapiens GN=FN1 PE=1 SV=4	2	793.833	1	WCGTTQNYDADQK	105.207	795.603	124.011	27.5928	45568.5
P02751	FINC	Fibronectin OS=Homo sapiens GN=FN1 PE=1 SV=4	2	731.4	1	VPGTSTSATLTGLTR	17126.2	74610	209.349	3410.11	489.606
P02751	FINC	Fibronectin OS=Homo sapiens GN=FN1 PE=1 SV=4	2	731.4	1	VPGTSTSATLTGLTR	5575.06	1766.58	201982	659.81	5357.49
P02751	FINC	Fibronectin OS=Homo sapiens GN=FN1 PE=1 SV=4	2	731.401	1	VPGTSTSATLTGLTR	10575.4	28556.4	892.548	37866.7	200230
P02751	FINC	Fibronectin OS=Homo sapiens GN=FN1 PE=1 SV=4	2	731.401	1	VPGTSTSATLTGLTR	746.286	9280.05	668.436	125481	1799.89
P02751	FINC	Fibronectin OS=Homo sapiens GN=FN1 PE=1 SV=4	2	731.401	1	VPGTSTSATLTGLTR	79830.3	3921.99	2122.86	120.46	483.35
P02751	FINC	Fibronectin OS=Homo sapiens GN=FN1 PE=1 SV=4	2	772.387	1	SYTITGLQPGTDYK	278.533	48628.3	488.74	5576.89	118.242
P02751	FINC	Fibronectin OS=Homo sapiens GN=FN1 PE=1 SV=4	2	772.388	1	SYTITGLQPGTDYK	3704.99	2436.67	2134.27	3143.65	152619
P02751	FINC	Fibronectin OS=Homo sapiens GN=FN1 PE=1 SV=4	2	772.387	1	SYTITGLQPGTDYK	6431.09	3990.77	128970	7265.21	698.431
P02751	FINC	Fibronectin OS=Homo sapiens GN=FN1 PE=1 SV=4	2	772.388	1	SYTITGLQPGTDYK	4823.5	1962.72	4519.64	64821.2	7593.65
P02751	FINC	Fibronectin OS=Homo sapiens GN=FN1 PE=1 SV=4	2	772.388	1	SYTITGLQPGTDYK	59495.6	15936.1	5215.65	8673.3	4183.19
P02751	FINC	Fibronectin OS=Homo sapiens GN=FN1 PE=1 SV=4	3	477.922	1	WSRPQAPITGYR	541.965	23671.5	252.499	167.955	169.478
P02751	FINC	Fibronectin OS=Homo sapiens GN=FN1 PE=1 SV=4	3	431.522	1	WCHDNGVNYK	6530.59	7380.64	2550.24	5537.51	1601.2
P02751	FINC	Fibronectin OS=Homo sapiens GN=FN1 PE=1 SV=4	2	679.348	1	IAWESPQGQVSR	38393.1	36279.5	592.813	848.808	260.123
P02751	FINC	Fibronectin OS=Homo sapiens GN=FN1 PE=1 SV=4	2	679.353	1	IAWESPQGQVSR	14786.2	2369.71	25846.9	1820.1	112.233
P02751	FINC	Fibronectin OS=Homo sapiens GN=FN1 PE=1 SV=4	3	531.275	1	GDSPASSKPISINYR	25425.4	27995.8	16759	5595.9	12244
P02751	FINC	Fibronectin OS=Homo sapiens GN=FN1 PE=1 SV=4	2	690.358	1	GLAFTDVDVDSIK	41285	2860.34	124815	5547.34	9580.38
P02751	FINC	Fibronectin OS=Homo sapiens GN=FN1 PE=1 SV=4	2	690.359	1	GLAFTDVDVDSIK	5556.09	3461.62	15450.6	74972.1	4937.07
P02751	FINC	Fibronectin OS=Homo sapiens GN=FN1 PE=1 SV=4	2	690.356	1	GLAFTDVDVDSIK	5063.11	19518.5	1919.42	2537.16	5439.02
P02751	FINC	Fibronectin OS=Homo sapiens GN=FN1 PE=1 SV=4	2	690.359	1	GLAFTDVDVDSIK	7455.56	31765.6	2653.31	1709.26	3726.45
P02751	FINC	Fibronectin OS=Homo sapiens GN=FN1 PE=1 SV=4	2	690.358	1	GLAFTDVDVDSIK	51834.7	2272.61	10596.7	4645.46	7324.03
P02751	FINC	Fibronectin OS=Homo sapiens GN=FN1 PE=1 SV=4	3	826.742	1	TEIDKPSQMQVTDVQDNSISVK	39.9247	67806.9	0	0	9.1597
P02751	FINC	Fibronectin OS=Homo sapiens GN=FN1 PE=1 SV=4	3	826.742	1	TEIDKPSQMQVTDVQDNSISVK	310.168	234.182	0	58771.8	0
P02751	FINC	Fibronectin OS=Homo sapiens GN=FN1 PE=1 SV=4	3	826.741	1	TEIDKPSQMQVTDVQDNSISVK	36366.4	1106.6	5728.55	164.928	19.3419
P02751	FINC	Fibronectin OS=Homo sapiens GN=FN1 PE=1 SV=4	2	866.979	1	NLQPASEYTVSLVAIK	78.4939	968.044	146581	1657.78	672.123
P02751	FINC	Fibronectin OS=Homo sapiens GN=FN1 PE=1 SV=4	2	866.98	1	NLQPASEYTVSLVAIK	264.203	77295.3	1143.72	74.7935	0
P02751	FINC	Fibronectin OS=Homo sapiens GN=FN1 PE=1 SV=4	2	866.98	1	NLQPASEYTVSLVAIK	366.285	415.508	231.787	114120	175.892
P02751	FINC	Fibronectin OS=Homo sapiens GN=FN1 PE=1 SV=4	2	866.98	1	NLQPASEYTVSLVAIK	89180.4	1109.98	424.998	258.091	164.921
P02751	FINC	Fibronectin OS=Homo sapiens GN=FN1 PE=1 SV=4	2	866.979	1	NLQPASEYTVSLVAIK	1323.62	584.544	3775.98	3976.58	125785
P02751	FINC	Fibronectin OS=Homo sapiens GN=FN1 PE=1 SV=4	2	997.502	1	NTFAEVTGLSPGVTYYFK	3858.49	5724.57	138801	3715.04	3262.65
P02751	FINC	Fibronectin OS=Homo sapiens GN=FN1 PE=1 SV=4	2	997.502	1	NTFAEVTGLSPGVTYYFK	8254.29	63061	11471.5	1063.97	10833.5
P02751	FINC	Fibronectin OS=Homo sapiens GN=FN1 PE=1 SV=4	2	997.503	1	NTFAEVTGLSPGVTYYFK	22016.6	36177.8	3784.05	101076	7439.13
P02751	FINC	Fibronectin OS=Homo sapiens GN=FN1 PE=1 SV=4	2	997.502	1	NTFAEVTGLSPGVTYYFK	75586.9	1712.44	6653.81	713.788	7184.33
P02751	FINC	Fibronectin OS=Homo sapiens GN=FN1 PE=1 SV=4	3	858.119	1	TKTETITGFQVDAVPANGQTPIQR	3626.94	4074.44	5039.68	175017	2981.18
P02751	FINC	Fibronectin OS=Homo sapiens GN=FN1 PE=1 SV=4	3	858.12	1	TKTETITGFQVDAVPANGQTPIQR	102437	5997.72	5808.62	861.755	145.597
P02751	FINC	Fibronectin OS=Homo sapiens GN=FN1 PE=1 SV=4	3	858.12	1	TKTETITGFQVDAVPANGQTPIQR	797.904	87576	188.465	1051.08	96.4
P02751	FINC	Fibronectin OS=Homo sapiens GN=FN1 PE=1 SV=4	2	731.85	1	GNLLQCICTGNGR	8856.7	21319.8	595.085	1440	677.458
P02751	FINC	Fibronectin OS=Homo sapiens GN=FN1 PE=1 SV=4	2	731.85	1	GNLLQCICTGNGR	1610.53	2854.65	15105.5	1327.55	71663.9
P02751	FINC	Fibronectin OS=Homo sapiens GN=FN1 PE=1 SV=4	2	731.849	1	GNLLQCICTGNGR	4074.75	7110.91	45475.1	485.569	4399.51
P02751	FINC	Fibronectin OS=Homo sapiens GN=FN1 PE=1 SV=4	3	884.706	1	FGFCPMAAHEEICTTNEGVMYR	540.511	265.822	149138	1324.86	9841.86
P02751	FINC	Fibronectin OS=Homo sapiens GN=FN1 PE=1 SV=4	3	884.707	1	FGFCPMAAHEEICTTNEGVMYR	849.792	96036.5	685.673	2314.98	643.926
P02751	FINC	Fibronectin OS=Homo sapiens GN=FN1 PE=1 SV=4	3	884.706	1	FGFCPMAAHEEICTTNEGVMYR	6.71918	703.141	1303.01	116826	2721.08
P02751	FINC	Fibronectin OS=Homo sapiens GN=FN1 PE=1 SV=4	3	884.707	1	FGFCPMAAHEEICTTNEGVMYR	291.594	494.108	3015.43	1861.9	76076.9
P02751	FINC	Fibronectin OS=Homo sapiens GN=FN1 PE=1 SV=4	3	884.707	1	FGFCPMAAHEEICTTNEGVMYR	58475.2	239.287	3647.56	4630.63	405.154
P02751	FINC	Fibronectin OS=Homo sapiens GN=FN1 PE=1 SV=4	2	646.841	1	DLQFVEVTDVK	3257.89	1866.42	31729.4	2849.18	2746.71
P02751	FINC	Fibronectin OS=Homo sapiens GN=FN1 PE=1 SV=4	2	646.843	1	DLQFVEVTDVK	3753.29	4390.57	24262	62102.7	41209.1
P02751	FINC	Fibronectin OS=Homo sapiens GN=FN1 PE=1 SV=4	2	957.003	1	SSPVVIDASTAIDAPSNLR	1472.28	64027.5	20750	5483.96	77.1444
P02751	FINC	Fibronectin OS=Homo sapiens GN=FN1 PE=1 SV=4	2	957.005	1	SSPVVIDASTAIDAPSNLR	1274.2	441.252	1215.95	1087.09	170587
P02751	FINC	Fibronectin OS=Homo sapiens GN=FN1 PE=1 SV=4	2	957.003	1	SSPVVIDASTAIDAPSNLR	4077.36	1697.53	143647	260.814	8726.25
P02751	FINC	Fibronectin OS=Homo sapiens GN=FN1 PE=1 SV=4	2	957.002	1	SSPVVIDASTAIDAPSNLR	79388.5	226.191	9276.13	1266.45	14161.8
P02751	FINC	Fibronectin OS=Homo sapiens GN=FN1 PE=1 SV=4	3	638.343	1	SSPVVIDASTAIDAPSNLR	19807	560.093	11287.8	5576.81	9377.79
P02751	FINC	Fibronectin OS=Homo sapiens GN=FN1 PE=1 SV=4	2	957.002	1	SSPVVIDASTAIDAPSNLR	869.321	5214.07	2846.98	97964.9	51306.6
P02751	FINC	Fibronectin OS=Homo sapiens GN=FN1 PE=1 SV=4	3	523.199	1	CDPHEATCYDDGK	4557.95	4037.12	4478.24	2925.08	3908.78
P02751	FINC	Fibronectin OS=Homo sapiens GN=FN1 PE=1 SV=4	3	799.369	1	RPGGEPSPEGTTGQSYNQYSQR	11771.3	19360.6	0	493.673	0
P02751	FINC	Fibronectin OS=Homo sapiens GN=FN1 PE=1 SV=4	3	1014.87	1	VVTPLSPPTNLHLEANPDTGVLTVSWER	1992.55	67254.5	276.011	1365.83	254.623
P02751	FINC	Fibronectin OS=Homo sapiens GN=FN1 PE=1 SV=4	3	1014.87	1	VVTPLSPPTNLHLEANPDTGVLTVSWER	90393.7	4451.14	1715.88	992.962	380.856
P02751	FINC	Fibronectin OS=Homo sapiens GN=FN1 PE=1 SV=4	3	576.281	1	YSFCTDHTVLVQTR	1606.15	242.055	7240.12	50981.2	3471.51
P02751	FINC	Fibronectin OS=Homo sapiens GN=FN1 PE=1 SV=4	3	576.281	1	YSFCTDHTVLVQTR	320.385	568.764	42043	2067.05	2864.34
P02751	FINC	Fibronectin OS=Homo sapiens GN=FN1 PE=1 SV=4	3	576.281	1	YSFCTDHTVLVQTR	600.36	89.3804	1049.08	74.7306	28242.1
P02751	FINC	Fibronectin OS=Homo sapiens GN=FN1 PE=1 SV=4	3	732.982	1	QDGHLWCSTTSNYEQDQK	10335.5	17242.3	210.335	34.1153	2919.29
P02751	FINC	Fibronectin OS=Homo sapiens GN=FN1 PE=1 SV=4	3	821.41	1	TEIDKPSQMQVTDVQDNSISVK	6870.76	4855.5	6990.3	4286.81	128960
P02751	FINC	Fibronectin OS=Homo sapiens GN=FN1 PE=1 SV=4	3	821.408	1	TEIDKPSQMQVTDVQDNSISVK	45819.6	4191.96	780.477	2178.66	1357.29
P02751	FINC	Fibronectin OS=Homo sapiens GN=FN1 PE=1 SV=4	3	898.132	1	FTQVTPTSLSAQWTPPNVQLTGYR	917.409	24478.6	1565.96	5820.32	1700.07
P02751	FINC	Fibronectin OS=Homo sapiens GN=FN1 PE=1 SV=4	3	898.132	1	FTQVTPTSLSAQWTPPNVQLTGYR	2978.12	954.658	8334	1769.29	55642.3
P02751	FINC	Fibronectin OS=Homo sapiens GN=FN1 PE=1 SV=4	3	898.132	1	FTQVTPTSLSAQWTPPNVQLTGYR	39172.1	12497.1	2465.7	37729.5	1840.89
P02751	FINC	Fibronectin OS=Homo sapiens GN=FN1 PE=1 SV=4	2	896.414	1	TYLGNALVCTCYGGSR	532.994	21095.3	466.75	431.958	227.588
P02751	FINC	Fibronectin OS=Homo sapiens GN=FN1 PE=1 SV=4	2	896.414	1	TYLGNALVCTCYGGSR	4140.03	3788.65	1772.12	44491.4	0
P02751	FINC	Fibronectin OS=Homo sapiens GN=FN1 PE=1 SV=4	2	1084.53	1	ITYGETGGNSPVQEFTVPGSK	17207.3	13562	306.821	347.129	110066
P02751	FINC	Fibronectin OS=Homo sapiens GN=FN1 PE=1 SV=4	2	1084.53	1	ITYGETGGNSPVQEFTVPGSK	108.146	31404.7	1794.67	0	162.047
P02751	FINC	Fibronectin OS=Homo sapiens GN=FN1 PE=1 SV=4	2	1084.53	1	ITYGETGGNSPVQEFTVPGSK	31744.2	0.302516	0	0	70.1952
P02751	FINC	Fibronectin OS=Homo sapiens GN=FN1 PE=1 SV=4	2	939.903	1	EYLGAICSCTCFGGQR	13368.6	756.778	50625.9	596.235	475.613
P02751	FINC	Fibronectin OS=Homo sapiens GN=FN1 PE=1 SV=4	2	939.903	1	EYLGAICSCTCFGGQR	40151.9	192.63	883.945	212.808	2080.88
P02751	FINC	Fibronectin OS=Homo sapiens GN=FN1 PE=1 SV=4	2	829.344	1	DSMIWDCTCIGAGR	195.575	321.049	48578.2	180.122	1.13283
P02751	FINC	Fibronectin OS=Homo sapiens GN=FN1 PE=1 SV=4	2	829.344	1	DSMIWDCTCIGAGR	767.914	323.956	156.233	23813.8	219.186
P02751	FINC	Fibronectin OS=Homo sapiens GN=FN1 PE=1 SV=4	3	642.69	1	VTWAPPPSIDLTNFLVR	81.9102	6472.98	336.316	681.589	2552.18
P02751	FINC	Fibronectin OS=Homo sapiens GN=FN1 PE=1 SV=4	2	978.008	1	EESPLLIGQQSTVSDVPR	10887.1	2830.59	42299.1	72.6844	1320.7
P02751	FINC	Fibronectin OS=Homo sapiens GN=FN1 PE=1 SV=4	2	978.009	1	EESPLLIGQQSTVSDVPR	218.97	18608.8	10494.4	142.909	18.6553
P02751	FINC	Fibronectin OS=Homo sapiens GN=FN1 PE=1 SV=4	4	700.627	1	GLKPGVVYEGQLISIQQYGHQEVTR	61.9071	3.58028	164.191	14995.5	168.495
P02751	FINC	Fibronectin OS=Homo sapiens GN=FN1 PE=1 SV=4	2	1262.69	1	DLEVVAATPTSLLISWDAPAVTVR	8502.77	37.2107	159.125	590.178	200.137
P02787	TRFE	Serotransferrin OS=Homo sapiens GN=TF PE=1 SV=3	3	606.608	1	EGTCPEAPTDECKPVK	4.76762e+06	2.34054e+06	2544.47	2068.94	1020.2
P02787	TRFE	Serotransferrin OS=Homo sapiens GN=TF PE=1 SV=3	2	909.407	1	EGTCPEAPTDECKPVK	1.36807e+06	628739	35.3705	123.71	57.9997
P02787	TRFE	Serotransferrin OS=Homo sapiens GN=TF PE=1 SV=3	3	439.869	1	WCAVSEHEATK	1.36234e+06	787962	2285.14	1733.62	4607.58
P02787	TRFE	Serotransferrin OS=Homo sapiens GN=TF PE=1 SV=3	2	659.299	1	WCAVSEHEATK	1.13533e+06	630100	157.74	109.57	390.117
P02787	TRFE	Serotransferrin OS=Homo sapiens GN=TF PE=1 SV=3	3	439.869	1	WCAVSEHEATK	143068	364.862	169.492	5.29745	234.857
P02787	TRFE	Serotransferrin OS=Homo sapiens GN=TF PE=1 SV=3	2	659.3	1	WCAVSEHEATK	15366.9	9432.05	251.631	248.566	871.923
P02787	TRFE	Serotransferrin OS=Homo sapiens GN=TF PE=1 SV=3	3	439.869	1	WCAVSEHEATK	122561	4060.2	731.101	350.52	1612.35
P02787	TRFE	Serotransferrin OS=Homo sapiens GN=TF PE=1 SV=3	2	659.299	1	WCAVSEHEATK	127902	4588.26	1669.03	2863.02	6606.62
P02787	TRFE	Serotransferrin OS=Homo sapiens GN=TF PE=1 SV=3	2	606.278	1	DSGFQMNQLR	1.48432e+06	1.59903e+06	1211.85	2165.26	2059.5
P02787	TRFE	Serotransferrin OS=Homo sapiens GN=TF PE=1 SV=3	2	500.754	1	YLGEEYVK	1.23266e+06	651788	8228.51	1680.65	4589.91
P02787	TRFE	Serotransferrin OS=Homo sapiens GN=TF PE=1 SV=3	3	529.596	1	KPVEEYANCHLAR	1.23291e+06	849285	9889.33	8924.4	14820.2
P02787	TRFE	Serotransferrin OS=Homo sapiens GN=TF PE=1 SV=3	4	397.45	1	KPVEEYANCHLAR	415785	266790	157.126	424.072	99.0911
P02787	TRFE	Serotransferrin OS=Homo sapiens GN=TF PE=1 SV=3	2	793.892	1	KPVEEYANCHLAR	269876	224082	0	2143.04	0
P02787	TRFE	Serotransferrin OS=Homo sapiens GN=TF PE=1 SV=3	3	529.597	1	KPVEEYANCHLAR	682312	5321.47	7015.01	7719.83	60499.1
P02787	TRFE	Serotransferrin OS=Homo sapiens GN=TF PE=1 SV=3	4	397.45	1	KPVEEYANCHLAR	145222	443.12	983.999	771.171	1771.24
P02787	TRFE	Serotransferrin OS=Homo sapiens GN=TF PE=1 SV=3	3	529.597	1	KPVEEYANCHLAR	5213.9	88293.5	617.702	1511.69	823.514
P02787	TRFE	Serotransferrin OS=Homo sapiens GN=TF PE=1 SV=3	2	598.282	1	DSGFQMNQLR	550799	14474.2	4939.15	5261.9	33252.1
P02787	TRFE	Serotransferrin OS=Homo sapiens GN=TF PE=1 SV=3	2	482.771	1	APNHAVVTR	361140	176490	818.207	724.43	693.137
P02787	TRFE	Serotransferrin OS=Homo sapiens GN=TF PE=1 SV=3	2	863.389	1	IECVSAETTEDCIAK	1.75308e+06	979208	345.511	145.864	19.0384
P02787	TRFE	Serotransferrin OS=Homo sapiens GN=TF PE=1 SV=3	3	575.929	1	IECVSAETTEDCIAK	96187.7	51594.5	111.864	29.7603	95.4776
P02787	TRFE	Serotransferrin OS=Homo sapiens GN=TF PE=1 SV=3	3	575.929	1	IECVSAETTEDCIAK	25849.1	2754.44	88.3161	382.292	423.3
P02787	TRFE	Serotransferrin OS=Homo sapiens GN=TF PE=1 SV=3	2	708.365	1	SVIPSDGPSVACVK	41653.7	1.1577e+06	458.764	2362	1746.89
P02787	TRFE	Serotransferrin OS=Homo sapiens GN=TF PE=1 SV=3	2	708.365	1	SVIPSDGPSVACVK	1.33508e+06	74922.1	2267.1	1714.3	1938.1
P02787	TRFE	Serotransferrin OS=Homo sapiens GN=TF PE=1 SV=3	2	789.335	1	FDEFFSEGCAPGSK	17929.6	1.65861e+06	4951.85	10908.2	5373.25
P02787	TRFE	Serotransferrin OS=Homo sapiens GN=TF PE=1 SV=3	2	789.334	1	FDEFFSEGCAPGSK	4.17669e+06	39989.2	38203.1	8096.46	13540.3
P02787	TRFE	Serotransferrin OS=Homo sapiens GN=TF PE=1 SV=3	3	526.559	1	FDEFFSEGCAPGSK	16710.1	22541.4	183.171	242.71	96.5796
P02787	TRFE	Serotransferrin OS=Homo sapiens GN=TF PE=1 SV=3	2	642.29	1	EGYYGYTGAFR	290662	755100	6932.74	12851.2	905.093
P02787	TRFE	Serotransferrin OS=Homo sapiens GN=TF PE=1 SV=3	2	642.29	1	EGYYGYTGAFR	1.85926e+06	20488.2	60073	25494.2	26250.4
P02787	TRFE	Serotransferrin OS=Homo sapiens GN=TF PE=1 SV=3	4	638.081	1	KPVDEYKDCHLAQVPSHTVVAR	5283.79	829494	1268.9	1884.63	1870.16
P02787	TRFE	Serotransferrin OS=Homo sapiens GN=TF PE=1 SV=3	5	510.666	1	KPVDEYKDCHLAQVPSHTVVAR	1.34807e+06	4281.45	8741.32	15486.6	10031.7
P02787	TRFE	Serotransferrin OS=Homo sapiens GN=TF PE=1 SV=3	4	638.081	1	KPVDEYKDCHLAQVPSHTVVAR	1.01278e+06	14545.4	43555.5	28828.3	61175.1
P02787	TRFE	Serotransferrin OS=Homo sapiens GN=TF PE=1 SV=3	3	850.438	1	KPVDEYKDCHLAQVPSHTVVAR	55.1174	157948	8.93568	0	21.1015
P02787	TRFE	Serotransferrin OS=Homo sapiens GN=TF PE=1 SV=3	3	850.437	1	KPVDEYKDCHLAQVPSHTVVAR	132551	8766.89	9482.27	13157	21996.9
P02787	TRFE	Serotransferrin OS=Homo sapiens GN=TF PE=1 SV=3	2	637.331	1	HSTIFENLANK	19412.4	598317	1181.3	2314.31	495.035
P02787	TRFE	Serotransferrin OS=Homo sapiens GN=TF PE=1 SV=3	2	637.331	1	HSTIFENLANK	1.04108e+06	12721.2	2365.87	1475.89	238.703
P02787	TRFE	Serotransferrin OS=Homo sapiens GN=TF PE=1 SV=3	3	425.224	1	HSTIFENLANK	1278.57	86931.5	422.762	300.223	139.566
P02787	TRFE	Serotransferrin OS=Homo sapiens GN=TF PE=1 SV=3	3	425.224	1	HSTIFENLANK	158275	1739.63	531.249	609.135	628.251
P02787	TRFE	Serotransferrin OS=Homo sapiens GN=TF PE=1 SV=3	2	637.331	1	HSTIFENLANK	574320	167108	153699	100514	509605
P02787	TRFE	Serotransferrin OS=Homo sapiens GN=TF PE=1 SV=3	3	425.223	1	HSTIFENLANK	67564.2	4644.07	2779.23	10113.9	28699.3
P02787	TRFE	Serotransferrin OS=Homo sapiens GN=TF PE=1 SV=3	2	637.332	1	HSTIFENLANK	14454.8	68217.5	55970.5	19712.7	7538.45
P02787	TRFE	Serotransferrin OS=Homo sapiens GN=TF PE=1 SV=3	2	861.885	1	LCMGSGLNLCEPNNK	1.37954e+06	1.06271e+06	20.5649	20.0493	181.227
P02787	TRFE	Serotransferrin OS=Homo sapiens GN=TF PE=1 SV=3	3	574.926	1	LCMGSGLNLCEPNNK	85452.3	74497.9	12.7099	54.181	692.978
P02787	TRFE	Serotransferrin OS=Homo sapiens GN=TF PE=1 SV=3	2	861.886	1	LCMGSGLNLCEPNNK	301442	47393.7	5699.1	8671.36	1109.16
P02787	TRFE	Serotransferrin OS=Homo sapiens GN=TF PE=1 SV=3	2	625.308	1	SASDLTWDNLK	873487	415267	77416	1221.84	25043.5
P02787	TRFE	Serotransferrin OS=Homo sapiens GN=TF PE=1 SV=3	2	625.307	1	SASDLTWDNLK	370207	20059.7	54057.8	58503.3	30977.9
P02787	TRFE	Serotransferrin OS=Homo sapiens GN=TF PE=1 SV=3	2	815.414	1	EDPQTFYYAVAVVK	4.12912e+06	52541.5	98951.8	387960	30949.2
P02787	TRFE	Serotransferrin OS=Homo sapiens GN=TF PE=1 SV=3	2	815.414	1	EDPQTFYYAVAVVK	24362.5	984783	11432.6	42877.6	10012.1
P02787	TRFE	Serotransferrin OS=Homo sapiens GN=TF PE=1 SV=3	3	543.944	1	EDPQTFYYAVAVVK	205739	7325.4	24363.4	45395.7	25094.4
P02787	TRFE	Serotransferrin OS=Homo sapiens GN=TF PE=1 SV=3	3	543.945	1	EDPQTFYYAVAVVK	10084.8	46391.2	9445.34	10668.1	16927.5
P02787	TRFE	Serotransferrin OS=Homo sapiens GN=TF PE=1 SV=3	3	364.882	1	APNHAVVTRK	151273	81377.6	313.136	387.385	62.5066
P02787	TRFE	Serotransferrin OS=Homo sapiens GN=TF PE=1 SV=3	2	546.819	1	APNHAVVTRK	87971.5	57205.8	146.858	682.418	204.233
P02787	TRFE	Serotransferrin OS=Homo sapiens GN=TF PE=1 SV=3	3	399.187	1	WCALSHHER	123587	153058	613.651	428.038	1011.2
P02787	TRFE	Serotransferrin OS=Homo sapiens GN=TF PE=1 SV=3	2	598.276	1	WCALSHHER	32109.9	48940.8	1645.23	663.574	967.774
P02787	TRFE	Serotransferrin OS=Homo sapiens GN=TF PE=1 SV=3	2	766.35	1	CSTSSLLEACTFR	5579.71	851060	8304.69	8194.01	1734
P02787	TRFE	Serotransferrin OS=Homo sapiens GN=TF PE=1 SV=3	2	766.35	1	CSTSSLLEACTFR	2.11942e+06	25043.1	28530.5	30586.7	19330
P02787	TRFE	Serotransferrin OS=Homo sapiens GN=TF PE=1 SV=3	3	511.235	1	CSTSSLLEACTFR	355.062	27469.3	1740.89	5265.21	428.184
P02787	TRFE	Serotransferrin OS=Homo sapiens GN=TF PE=1 SV=3	3	511.236	1	CSTSSLLEACTFR	69067.7	3733.91	359.582	203.138	2457.88
P02787	TRFE	Serotransferrin OS=Homo sapiens GN=TF PE=1 SV=3	2	747.87	1	MYLGYEYVTAIR	2.59198e+06	19932.7	19861.9	15067.2	34748.9
P02787	TRFE	Serotransferrin OS=Homo sapiens GN=TF PE=1 SV=3	2	747.871	1	MYLGYEYVTAIR	20892	1.39539e+06	126818	19713.1	18654.6
P02787	TRFE	Serotransferrin OS=Homo sapiens GN=TF PE=1 SV=3	2	747.871	1	MYLGYEYVTAIR	1648.31	163887	28686.2	5672.91	3200.31
P02787	TRFE	Serotransferrin OS=Homo sapiens GN=TF PE=1 SV=3	3	498.916	1	MYLGYEYVTAIR	62785.8	314.572	3603.67	2651.35	2260.8
P02787	TRFE	Serotransferrin OS=Homo sapiens GN=TF PE=1 SV=3	3	498.916	1	MYLGYEYVTAIR	7717.83	34245.4	2319.4	3759.36	3025.67
P02787	TRFE	Serotransferrin OS=Homo sapiens GN=TF PE=1 SV=3	3	522.606	1	DLLFRDDTVCLAK	2039.39	375411	3601.09	3970.23	6625.5
P02787	TRFE	Serotransferrin OS=Homo sapiens GN=TF PE=1 SV=3	3	522.606	1	DLLFRDDTVCLAK	1.68404e+06	2594.83	18985.7	23605	154756
P02787	TRFE	Serotransferrin OS=Homo sapiens GN=TF PE=1 SV=3	2	783.406	1	DLLFRDDTVCLAK	1.30453e+06	8391.9	18792.5	12289.8	95717.7
P02787	TRFE	Serotransferrin OS=Homo sapiens GN=TF PE=1 SV=3	3	627.966	1	ADRDQYELLCLDNTR	947.727	589499	1281.61	403.965	2717.71
P02787	TRFE	Serotransferrin OS=Homo sapiens GN=TF PE=1 SV=3	3	627.965	1	ADRDQYELLCLDNTR	1.70583e+06	14345.4	15439.4	45584.7	18789.8
P02787	TRFE	Serotransferrin OS=Homo sapiens GN=TF PE=1 SV=3	2	941.444	1	ADRDQYELLCLDNTR	31.9041	74668.7	175.765	278.286	65.7088
P02787	TRFE	Serotransferrin OS=Homo sapiens GN=TF PE=1 SV=3	3	627.965	1	ADRDQYELLCLDNTR	34623.2	171389	5390.14	11232.4	4987.36
P02787	TRFE	Serotransferrin OS=Homo sapiens GN=TF PE=1 SV=3	2	941.444	1	ADRDQYELLCLDNTR	291160	10348.6	3152.76	2213.93	1002.48
P02787	TRFE	Serotransferrin OS=Homo sapiens GN=TF PE=1 SV=3	3	658.999	1	HQTVPQNTGGKNPDPWAK	695674	370512	1968.39	7237.13	903.953
P02787	TRFE	Serotransferrin OS=Homo sapiens GN=TF PE=1 SV=3	3	658.999	1	HQTVPQNTGGKNPDPWAK	226315	7323.91	4985.99	6869.52	5760.18
P02787	TRFE	Serotransferrin OS=Homo sapiens GN=TF PE=1 SV=3	2	761.373	1	LKCDEWSVNSVGK	344162	160118	7426.72	831.72	1462.25
P02787	TRFE	Serotransferrin OS=Homo sapiens GN=TF PE=1 SV=3	3	507.918	1	LKCDEWSVNSVGK	107742	1878.84	366.003	1006.96	564.359
P02787	TRFE	Serotransferrin OS=Homo sapiens GN=TF PE=1 SV=3	3	569.257	1	FDEFFSEGCAPGSKK	54113.4	347611	6582.93	2579.09	749.348
P02787	TRFE	Serotransferrin OS=Homo sapiens GN=TF PE=1 SV=3	3	569.257	1	FDEFFSEGCAPGSKK	933179	2692.82	20178.2	7385.59	1326.86
P02787	TRFE	Serotransferrin OS=Homo sapiens GN=TF PE=1 SV=3	2	853.382	1	FDEFFSEGCAPGSKK	30185.4	90427.4	115.051	226.273	891.517
P02787	TRFE	Serotransferrin OS=Homo sapiens GN=TF PE=1 SV=3	2	853.382	1	FDEFFSEGCAPGSKK	219555	7453.13	11479.9	3785.3	17608.8
P02787	TRFE	Serotransferrin OS=Homo sapiens GN=TF PE=1 SV=3	2	739.875	1	MYLGYEYVTAIR	2.00311e+06	17314.4	23426.6	90766.2	32861.9
P02787	TRFE	Serotransferrin OS=Homo sapiens GN=TF PE=1 SV=3	2	739.874	1	MYLGYEYVTAIR	33262.2	584267	28618.6	52001.5	32165.6
P02787	TRFE	Serotransferrin OS=Homo sapiens GN=TF PE=1 SV=3	3	493.585	1	MYLGYEYVTAIR	53741.1	2577.86	1357.11	1826.66	1406.83
P02787	TRFE	Serotransferrin OS=Homo sapiens GN=TF PE=1 SV=3	3	493.584	1	MYLGYEYVTAIR	417.734	14747.3	5946.45	322.068	1625.28
P02787	TRFE	Serotransferrin OS=Homo sapiens GN=TF PE=1 SV=3	2	797.41	1	TAGWNIPMGLLYNK	2.02951e+06	103218	40502.6	27992.6	31520.3
P02787	TRFE	Serotransferrin OS=Homo sapiens GN=TF PE=1 SV=3	2	797.41	1	TAGWNIPMGLLYNK	164267	980242	31056.2	40387.6	88333.3
P02787	TRFE	Serotransferrin OS=Homo sapiens GN=TF PE=1 SV=3	3	531.943	1	TAGWNIPMGLLYNK	9638.84	30678.7	9952.99	3034.61	3321.41
P02787	TRFE	Serotransferrin OS=Homo sapiens GN=TF PE=1 SV=3	2	770.361	1	DQYELLCLDNTR	37175.8	479354	9238.06	4714.82	17887.3
P02787	TRFE	Serotransferrin OS=Homo sapiens GN=TF PE=1 SV=3	2	770.362	1	DQYELLCLDNTR	1.62344e+06	21180.9	21554	15925.5	16379
P02787	TRFE	Serotransferrin OS=Homo sapiens GN=TF PE=1 SV=3	3	513.91	1	DQYELLCLDNTR	55.8572	16650.3	731.98	798.65	302.562
P02787	TRFE	Serotransferrin OS=Homo sapiens GN=TF PE=1 SV=3	3	513.91	1	DQYELLCLDNTR	58867	65.7734	199.279	2536.14	1598.45
P02787	TRFE	Serotransferrin OS=Homo sapiens GN=TF PE=1 SV=3	3	441.889	1	KDSGFQMNQLR	227984	49741.9	1445.19	2013.09	1166.43
P02787	TRFE	Serotransferrin OS=Homo sapiens GN=TF PE=1 SV=3	2	662.329	1	KDSGFQMNQLR	162503	36767.9	888.524	3173.35	175.098
P02787	TRFE	Serotransferrin OS=Homo sapiens GN=TF PE=1 SV=3	3	441.888	1	KDSGFQMNQLR	36930.5	296.881	15512.3	9516.75	280.073
P02787	TRFE	Serotransferrin OS=Homo sapiens GN=TF PE=1 SV=3	3	651.653	1	NLNEKDYELLCLDGTR	1.65478e+06	10759	6858.05	10613.7	35078
P02787	TRFE	Serotransferrin OS=Homo sapiens GN=TF PE=1 SV=3	3	651.653	1	NLNEKDYELLCLDGTR	12494.7	689129	77467.3	27323.8	54669.3
P02787	TRFE	Serotransferrin OS=Homo sapiens GN=TF PE=1 SV=3	3	651.653	1	NLNEKDYELLCLDGTR	1182.97	45342.4	2464.51	3110.39	5666.26
P02787	TRFE	Serotransferrin OS=Homo sapiens GN=TF PE=1 SV=3	2	976.976	1	NLNEKDYELLCLDGTR	2729	94009.1	1032.17	19118.8	1059.23
P02787	TRFE	Serotransferrin OS=Homo sapiens GN=TF PE=1 SV=3	3	724.372	1	SAGWNIPIGLLYCDLPEPR	1.20912e+06	3949.69	7337.64	8884	9986.25
P02787	TRFE	Serotransferrin OS=Homo sapiens GN=TF PE=1 SV=3	2	1086.05	1	SAGWNIPIGLLYCDLPEPR	2.15513e+06	8587.99	842.092	3118.71	573.465
P02787	TRFE	Serotransferrin OS=Homo sapiens GN=TF PE=1 SV=3	3	724.373	1	SAGWNIPIGLLYCDLPEPR	42287.1	577627	7920.64	7152.32	5809.59
P02787	TRFE	Serotransferrin OS=Homo sapiens GN=TF PE=1 SV=3	2	1086.05	1	SAGWNIPIGLLYCDLPEPR	13995.8	890778	2190	3108.24	12893.1
P02787	TRFE	Serotransferrin OS=Homo sapiens GN=TF PE=1 SV=3	2	563.291	1	KASYLDCIR	63610.6	5658.77	2237.57	16285.4	3529.41
P02787	TRFE	Serotransferrin OS=Homo sapiens GN=TF PE=1 SV=3	2	853.889	1	LCMGSGLNLCEPNNK	1.99939e+06	424925	20606.3	160939	11448.1
P02787	TRFE	Serotransferrin OS=Homo sapiens GN=TF PE=1 SV=3	2	853.888	1	LCMGSGLNLCEPNNK	19822.7	247579	443.525	1403	3745.84
P02787	TRFE	Serotransferrin OS=Homo sapiens GN=TF PE=1 SV=3	3	460.572	1	CLKDGAGDVAFVK	156178	92996.1	19.2571	78.2817	14.2814
P02787	TRFE	Serotransferrin OS=Homo sapiens GN=TF PE=1 SV=3	2	690.354	1	CLKDGAGDVAFVK	92090.7	60213.4	1326.28	161.166	22.4509
P02787	TRFE	Serotransferrin OS=Homo sapiens GN=TF PE=1 SV=3	3	460.572	1	CLKDGAGDVAFVK	49912.3	441.979	1547.7	997.905	999.672
P02787	TRFE	Serotransferrin OS=Homo sapiens GN=TF PE=1 SV=3	2	879.462	1	EDPQTFYYAVAVVKK	282.179	11627.5	0	257.845	38.8518
P02787	TRFE	Serotransferrin OS=Homo sapiens GN=TF PE=1 SV=3	3	539.281	1	HSTIFENLANKADR	7586.68	151815	1265.59	865.623	600.071
P02787	TRFE	Serotransferrin OS=Homo sapiens GN=TF PE=1 SV=3	3	539.279	1	HSTIFENLANKADR	271794	704.451	32440.3	7556.27	13241.2
P02787	TRFE	Serotransferrin OS=Homo sapiens GN=TF PE=1 SV=3	3	539.279	1	HSTIFENLANKADR	7424.98	52237.2	12730.8	2510.17	38583.3
P02787	TRFE	Serotransferrin OS=Homo sapiens GN=TF PE=1 SV=3	3	497.926	1	SKEFQLFSSPHGK	177431	120341	1070.91	758.3	1094.31
P02787	TRFE	Serotransferrin OS=Homo sapiens GN=TF PE=1 SV=3	3	497.926	1	SKEFQLFSSPHGK	100765	117.887	1876.7	1236.98	10846.5
P02787	TRFE	Serotransferrin OS=Homo sapiens GN=TF PE=1 SV=3	2	746.384	1	SKEFQLFSSPHGK	18664.5	18535.5	64.4429	253.539	365.142
P02787	TRFE	Serotransferrin OS=Homo sapiens GN=TF PE=1 SV=3	3	497.926	1	SKEFQLFSSPHGK	369.934	15465.7	1956.52	841.4	0
P02787	TRFE	Serotransferrin OS=Homo sapiens GN=TF PE=1 SV=3	2	640.784	1	CDEWSVNSVGK	128051	44097.5	301.729	423.143	1901.26
P02787	TRFE	Serotransferrin OS=Homo sapiens GN=TF PE=1 SV=3	3	996.445	1	LCMGSGLNLCEPNNKEGYYGYTGAFR	4229.27	1.27464e+06	59526.6	7599.41	544.938
P02787	TRFE	Serotransferrin OS=Homo sapiens GN=TF PE=1 SV=3	3	996.445	1	LCMGSGLNLCEPNNKEGYYGYTGAFR	1.7194e+06	10864	4083.75	5383.16	56744.7
P02787	TRFE	Serotransferrin OS=Homo sapiens GN=TF PE=1 SV=3	3	563.954	1	DCHLAQVPSHTVVAR	97523.1	54238.2	542.849	1341.01	448.801
P02787	TRFE	Serotransferrin OS=Homo sapiens GN=TF PE=1 SV=3	2	789.413	1	TAGWNIPMGLLYNK	715500	12773.4	9224	35455.1	40455.4
P02787	TRFE	Serotransferrin OS=Homo sapiens GN=TF PE=1 SV=3	2	789.412	1	TAGWNIPMGLLYNK	6333.44	122615	2329.55	7676.16	4415.95
P02787	TRFE	Serotransferrin OS=Homo sapiens GN=TF PE=1 SV=3	3	526.611	1	TAGWNIPMGLLYNK	15348	35.7661	1856.15	1282.27	8149.99
P02787	TRFE	Serotransferrin OS=Homo sapiens GN=TF PE=1 SV=3	3	991.114	1	LCMGSGLNLCEPNNKEGYYGYTGAFR	1.09171e+06	5714.26	4537.14	13159.7	152969
P02787	TRFE	Serotransferrin OS=Homo sapiens GN=TF PE=1 SV=3	3	991.114	1	LCMGSGLNLCEPNNKEGYYGYTGAFR	3760.31	194281	11811.4	1848.15	3143.78
P02787	TRFE	Serotransferrin OS=Homo sapiens GN=TF PE=1 SV=3	2	689.356	1	KSASDLTWDNLK	61771.2	32122	867.434	1090.41	1390.7
P02787	TRFE	Serotransferrin OS=Homo sapiens GN=TF PE=1 SV=3	2	1080.01	1	IMNGEADAMSLDGGFVYIAGK	1.04255e+06	11508.3	4829.72	8159.88	11819.1
P02787	TRFE	Serotransferrin OS=Homo sapiens GN=TF PE=1 SV=3	3	720.346	1	IMNGEADAMSLDGGFVYIAGK	217424	5193.47	26290.8	2937.32	10963.9
P02787	TRFE	Serotransferrin OS=Homo sapiens GN=TF PE=1 SV=3	2	1080.01	1	IMNGEADAMSLDGGFVYIAGK	21012.5	47071.2	2489.95	7217.78	172.489
P02787	TRFE	Serotransferrin OS=Homo sapiens GN=TF PE=1 SV=3	2	772.413	1	SVIPSDGPSVACVKK	85968.8	54422.3	1474	1665.93	3953.08
P02787	TRFE	Serotransferrin OS=Homo sapiens GN=TF PE=1 SV=3	2	1096.01	1	IMNGEADAMSLDGGFVYIAGK	3996.3	699971	2548.25	5320.43	28265.4
P02787	TRFE	Serotransferrin OS=Homo sapiens GN=TF PE=1 SV=3	3	731.009	1	IMNGEADAMSLDGGFVYIAGK	18625.1	332711	12695.1	22931.5	9592.42
P02787	TRFE	Serotransferrin OS=Homo sapiens GN=TF PE=1 SV=3	2	1096.01	1	IMNGEADAMSLDGGFVYIAGK	469445	30459.3	1166.16	889.448	645.418
P02787	TRFE	Serotransferrin OS=Homo sapiens GN=TF PE=1 SV=3	3	731.008	1	IMNGEADAMSLDGGFVYIAGK	174840	12578.7	10107.6	25955.7	3692.2
P02787	TRFE	Serotransferrin OS=Homo sapiens GN=TF PE=1 SV=3	3	553.935	1	KCSTSSLLEACTFR	187068	1151.57	7861.05	22839.4	24576
P02787	TRFE	Serotransferrin OS=Homo sapiens GN=TF PE=1 SV=3	2	830.404	1	KCSTSSLLEACTFR	200.01	21337.8	5361.36	6556.01	41588.4
P02787	TRFE	Serotransferrin OS=Homo sapiens GN=TF PE=1 SV=3	2	830.398	1	KCSTSSLLEACTFR	54949.5	6619.22	3361.57	22997.7	910.44
P02787	TRFE	Serotransferrin OS=Homo sapiens GN=TF PE=1 SV=3	3	1076.84	1	LKCDEWSVNSVGKIECVSAETTEDCIAK	152989	29402.4	758.125	3128.89	2253.61
P02787	TRFE	Serotransferrin OS=Homo sapiens GN=TF PE=1 SV=3	3	1076.84	1	LKCDEWSVNSVGKIECVSAETTEDCIAK	2229.81	89283.5	392.502	4760.43	7521.47
P02787	TRFE	Serotransferrin OS=Homo sapiens GN=TF PE=1 SV=3	2	1088.01	1	IMNGEADAMSLDGGFVYIAGK	622653	44115.2	9806.12	7830.72	8615.04
P02787	TRFE	Serotransferrin OS=Homo sapiens GN=TF PE=1 SV=3	2	1088.01	1	IMNGEADAMSLDGGFVYIAGK	641398	134511	4313.56	1771.91	2247.07
P02787	TRFE	Serotransferrin OS=Homo sapiens GN=TF PE=1 SV=3	3	725.677	1	IMNGEADAMSLDGGFVYIAGK	200378	43911.5	4434.16	5611.64	73961.8
P02787	TRFE	Serotransferrin OS=Homo sapiens GN=TF PE=1 SV=3	3	725.677	1	IMNGEADAMSLDGGFVYIAGK	170295	5788.48	6778.36	20002.2	6846.15
P02787	TRFE	Serotransferrin OS=Homo sapiens GN=TF PE=1 SV=3	2	1088.01	1	IMNGEADAMSLDGGFVYIAGK	641398	134511	4313.56	1771.91	2247.07
P02787	TRFE	Serotransferrin OS=Homo sapiens GN=TF PE=1 SV=3	2	1088.01	1	IMNGEADAMSLDGGFVYIAGK	12013.7	151547	4339.92	14904.1	246309
P02787	TRFE	Serotransferrin OS=Homo sapiens GN=TF PE=1 SV=3	3	725.677	1	IMNGEADAMSLDGGFVYIAGK	2371.16	23876.3	484.498	2384.88	0
P02787	TRFE	Serotransferrin OS=Homo sapiens GN=TF PE=1 SV=3	3	734.35	1	NLREGTCPEAPTDECKPVK	48734.5	54813.6	173.908	137.166	0
Q9P2E9	RRBP1	Ribosome-binding protein 1 OS=Homo sapiens GN=RRBP1 PE=1 SV=4	2	695.846	1	DALNQATSQVESK	32362.8	51282.5	287.106	2379.37	349.905
Q9P2E9	RRBP1	Ribosome-binding protein 1 OS=Homo sapiens GN=RRBP1 PE=1 SV=4	2	695.846	1	DALNQATSQVESK	98840.3	19761.2	58941.2	5401.51	928.856
Q9P2E9	RRBP1	Ribosome-binding protein 1 OS=Homo sapiens GN=RRBP1 PE=1 SV=4	2	524.258	1	AENSQLTER	10351.1	17710.9	15818.6	12290.8	14471.2
Q9P2E9	RRBP1	Ribosome-binding protein 1 OS=Homo sapiens GN=RRBP1 PE=1 SV=4	2	437.742	1	RLDEVSR	7557.68	9742.39	4753.32	6180.07	2388.55
Q9P2E9	RRBP1	Ribosome-binding protein 1 OS=Homo sapiens GN=RRBP1 PE=1 SV=4	3	454.241	1	LKGELESSDQVR	10516.7	13353.5	5938.62	7815.27	3315.29
Q9P2E9	RRBP1	Ribosome-binding protein 1 OS=Homo sapiens GN=RRBP1 PE=1 SV=4	3	557.931	1	AQEQQQQMAELHSK	7944.48	17274.6	13561.7	10704.6	6920.18
Q9P2E9	RRBP1	Ribosome-binding protein 1 OS=Homo sapiens GN=RRBP1 PE=1 SV=4	2	679.86	1	LLATEQEDAAVAK	2248.71	4049	41809	15695.3	479.307
Q9P2E9	RRBP1	Ribosome-binding protein 1 OS=Homo sapiens GN=RRBP1 PE=1 SV=4	2	730.405	1	LKELESQVSGLEK	1907.77	14927.2	25.0403	51.5377	349.766
Q9P2E9	RRBP1	Ribosome-binding protein 1 OS=Homo sapiens GN=RRBP1 PE=1 SV=4	2	772.422	1	QLLLESQSQLDAAK	1520.48	40118.2	238.633	70.5712	27.7131
Q9P2E9	RRBP1	Ribosome-binding protein 1 OS=Homo sapiens GN=RRBP1 PE=1 SV=4	2	772.422	1	QLLLESQSQLDAAK	873.093	1460.22	2634.15	2988.79	39770.4
Q9P2E9	RRBP1	Ribosome-binding protein 1 OS=Homo sapiens GN=RRBP1 PE=1 SV=4	3	663.636	1	DAQDVQASQAEADQQQTR	14695.4	18236.6	13685.5	13077.2	6013.56
Q9P2E9	RRBP1	Ribosome-binding protein 1 OS=Homo sapiens GN=RRBP1 PE=1 SV=4	2	994.951	1	DAQDVQASQAEADQQQTR	14333.3	17081.1	11846.8	9609.65	4195.08
Q9P2E9	RRBP1	Ribosome-binding protein 1 OS=Homo sapiens GN=RRBP1 PE=1 SV=4	2	629.345	1	SIEALLEAGQAR	11487.6	161.291	25568.1	404.606	3516.27
Q9P2E9	RRBP1	Ribosome-binding protein 1 OS=Homo sapiens GN=RRBP1 PE=1 SV=4	2	645.804	1	SVEEEEQVWR	16256	18471.6	852.845	1464.23	93.3847
Q9P2E9	RRBP1	Ribosome-binding protein 1 OS=Homo sapiens GN=RRBP1 PE=1 SV=4	2	705.324	1	AMEALATAEQACK	14309.5	25953.5	15423.3	15039.3	2015.48
Q9P2E9	RRBP1	Ribosome-binding protein 1 OS=Homo sapiens GN=RRBP1 PE=1 SV=4	2	628.811	1	NTDVAQSPEAPK	4971.53	9974.94	7217.72	4055.16	7257.67
Q9P2E9	RRBP1	Ribosome-binding protein 1 OS=Homo sapiens GN=RRBP1 PE=1 SV=4	2	906.468	1	TLQEQLENGPNTQLAR	786.696	26297.9	103.07	0	0
Q9P2E9	RRBP1	Ribosome-binding protein 1 OS=Homo sapiens GN=RRBP1 PE=1 SV=4	3	971.468	1	SHVEDGDIAGAPASSPEAPPAEQDPVQLK	2.1577	24645.1	3776.93	1881.61	2815.81
Q9P2E9	RRBP1	Ribosome-binding protein 1 OS=Homo sapiens GN=RRBP1 PE=1 SV=4	2	888.931	1	TAGPLESSETEEASQLK	1699.49	21740.6	40.5184	0	0
Q9P2E9	RRBP1	Ribosome-binding protein 1 OS=Homo sapiens GN=RRBP1 PE=1 SV=4	2	888.929	1	TAGPLESSETEEASQLK	6211.27	1112.07	20076.2	430.927	360.33
Q9P2E9	RRBP1	Ribosome-binding protein 1 OS=Homo sapiens GN=RRBP1 PE=1 SV=4	2	929.023	1	VEPAVSSVVNSIQVLTSK	2511.36	41474.3	2757.61	7899.31	104.282
Q9P2E9	RRBP1	Ribosome-binding protein 1 OS=Homo sapiens GN=RRBP1 PE=1 SV=4	3	619.683	1	VEPAVSSVVNSIQVLTSK	747.039	18468.5	2800.17	4170.3	977.937
P07237	PDIA1	Protein disulfide-isomerase OS=Homo sapiens GN=P4HB PE=1 SV=3	2	655.302	1	MDSTANEVEAVK	59410.6	88118.9	139008	102683	71925.5
P07237	PDIA1	Protein disulfide-isomerase OS=Homo sapiens GN=P4HB PE=1 SV=3	3	484.573	1	YKPESEELTAER	40266.8	26201.3	1236.21	30800.5	138.688
P07237	PDIA1	Protein disulfide-isomerase OS=Homo sapiens GN=P4HB PE=1 SV=3	2	726.355	1	YKPESEELTAER	28147.1	21573.1	358.046	18698.5	0
P07237	PDIA1	Protein disulfide-isomerase OS=Homo sapiens GN=P4HB PE=1 SV=3	3	484.573	1	YKPESEELTAER	247.979	56.8972	84935.9	973.667	11791.1
P07237	PDIA1	Protein disulfide-isomerase OS=Homo sapiens GN=P4HB PE=1 SV=3	3	386.869	1	SNFAEALAAHK	8286.51	4242.69	2735.44	3836.08	2430.82
P07237	PDIA1	Protein disulfide-isomerase OS=Homo sapiens GN=P4HB PE=1 SV=3	2	603.819	1	LITLEEEMTK	15161.7	4501.21	14261.5	3423.16	123877
P07237	PDIA1	Protein disulfide-isomerase OS=Homo sapiens GN=P4HB PE=1 SV=3	2	890.923	1	VDATEESDLAQQYGVR	0	67890.9	149.24	49.6721	50.1837
P07237	PDIA1	Protein disulfide-isomerase OS=Homo sapiens GN=P4HB PE=1 SV=3	2	890.922	1	VDATEESDLAQQYGVR	29017.1	11152.2	6155.89	2467.02	196365
P07237	PDIA1	Protein disulfide-isomerase OS=Homo sapiens GN=P4HB PE=1 SV=3	2	890.924	1	VDATEESDLAQQYGVR	4574.7	1774.68	8154.43	117459	1076.39
P07237	PDIA1	Protein disulfide-isomerase OS=Homo sapiens GN=P4HB PE=1 SV=3	2	890.924	1	VDATEESDLAQQYGVR	5355.16	11545.5	200785	12999	9298.55
P07237	PDIA1	Protein disulfide-isomerase OS=Homo sapiens GN=P4HB PE=1 SV=3	3	594.284	1	VDATEESDLAQQYGVR	30915.7	1295.11	2952.88	89.5203	418.739
P07237	PDIA1	Protein disulfide-isomerase OS=Homo sapiens GN=P4HB PE=1 SV=3	3	594.284	1	VDATEESDLAQQYGVR	1527.49	2690.69	49707.3	2112.27	1571.51
P07237	PDIA1	Protein disulfide-isomerase OS=Homo sapiens GN=P4HB PE=1 SV=3	3	594.285	1	VDATEESDLAQQYGVR	576.753	307.409	232.873	30880.9	1980.21
P07237	PDIA1	Protein disulfide-isomerase OS=Homo sapiens GN=P4HB PE=1 SV=3	3	429.567	1	KSNFAEALAAHK	9777	8535.58	31.9101	5270.72	5.27922
P07237	PDIA1	Protein disulfide-isomerase OS=Homo sapiens GN=P4HB PE=1 SV=3	3	577.308	1	LGETYKDHENIVIAK	14022.9	26959.4	926.414	859.779	480.108
P07237	PDIA1	Protein disulfide-isomerase OS=Homo sapiens GN=P4HB PE=1 SV=3	3	655.688	1	HNQLPLVIEFTEQTAPK	106462	2303.86	7744.65	1143.02	1618.48
P07237	PDIA1	Protein disulfide-isomerase OS=Homo sapiens GN=P4HB PE=1 SV=3	2	601.808	1	EADDIVNWLK	12727.2	17.4884	59894.4	5.99859	1743.71
P07237	PDIA1	Protein disulfide-isomerase OS=Homo sapiens GN=P4HB PE=1 SV=3	2	601.808	1	EADDIVNWLK	54.4024	236.623	4018.43	1014.55	48546.3
P07237	PDIA1	Protein disulfide-isomerase OS=Homo sapiens GN=P4HB PE=1 SV=3	2	601.808	1	EADDIVNWLK	235.751	12318.6	2723.7	777	186.298
P07237	PDIA1	Protein disulfide-isomerase OS=Homo sapiens GN=P4HB PE=1 SV=3	3	905.12	1	QFLQAAEAIDDIPFGITSNSDVFSK	97781.1	5871.97	75231.3	11297.7	27263
P07237	PDIA1	Protein disulfide-isomerase OS=Homo sapiens GN=P4HB PE=1 SV=3	3	905.121	1	QFLQAAEAIDDIPFGITSNSDVFSK	13045.2	42738.5	8300.22	9663.83	16731.8
P07237	PDIA1	Protein disulfide-isomerase OS=Homo sapiens GN=P4HB PE=1 SV=3	3	670.68	1	NNFEGEVTKENLLDFIK	36651.7	42.7222	2697.15	357.353	1745.37
P07237	PDIA1	Protein disulfide-isomerase OS=Homo sapiens GN=P4HB PE=1 SV=3	3	670.679	1	NNFEGEVTKENLLDFIK	133.443	19409.6	1466.78	4650.82	608.966
P07237	PDIA1	Protein disulfide-isomerase OS=Homo sapiens GN=P4HB PE=1 SV=3	3	361.231	1	THILLFLPK	0.528598	2011.85	0	0	0.403796
P07237	PDIA1	Protein disulfide-isomerase OS=Homo sapiens GN=P4HB PE=1 SV=3	3	361.233	1	THILLFLPK	510.307	223.61	256.599	4034.45	288.145
P07237	PDIA1	Protein disulfide-isomerase OS=Homo sapiens GN=P4HB PE=1 SV=3	3	475.599	1	YQLDKDGVVLFK	0	0.0434434	14406.3	62.8908	75.5852
P07237	PDIA1	Protein disulfide-isomerase OS=Homo sapiens GN=P4HB PE=1 SV=3	3	518.297	1	YQLDKDGVVLFKK	3185.1	4907.93	52.0712	234.455	518.631
P07237	PDIA1	Protein disulfide-isomerase OS=Homo sapiens GN=P4HB PE=1 SV=3	3	1258.49	1	FLESGGQDGAGDDDDLEDLEEAEEPDMEEDDDQK	0	352.03	122750	233.279	285.406
P07237	PDIA1	Protein disulfide-isomerase OS=Homo sapiens GN=P4HB PE=1 SV=3	3	1258.49	1	FLESGGQDGAGDDDDLEDLEEAEEPDMEEDDDQK	2623.79	47033	187.703	91.1281	307.274
P07237	PDIA1	Protein disulfide-isomerase OS=Homo sapiens GN=P4HB PE=1 SV=3	3	1258.49	1	FLESGGQDGAGDDDDLEDLEEAEEPDMEEDDDQK	1860.43	31.876	358.957	65693	0
P07237	PDIA1	Protein disulfide-isomerase OS=Homo sapiens GN=P4HB PE=1 SV=3	3	1253.16	1	FLESGGQDGAGDDDDLEDLEEAEEPDMEEDDDQK	56101.7	414.759	713.47	559.49	110.668
P05023	AT1A1	Sodium\potassium-transporting ATPase subunit alpha-1 OS=Homo sapiens GN=ATP1A1 PE=1 SV=1	2	490.266	1	GIVVYTGDR	28185	24743.9	29087.5	24718.8	26318.7
P05023	AT1A1	Sodium\potassium-transporting ATPase subunit alpha-1 OS=Homo sapiens GN=ATP1A1 PE=1 SV=1	2	810.381	1	VDNSSLTGESEPQTR	31538.9	47430.5	43194.9	31967.8	22000.3
P05023	AT1A1	Sodium\potassium-transporting ATPase subunit alpha-1 OS=Homo sapiens GN=ATP1A1 PE=1 SV=1	2	616.331	1	AVAGDASESALLK	22220.9	35233.3	44.0661	16950.2	222.311
P05023	AT1A1	Sodium\potassium-transporting ATPase subunit alpha-1 OS=Homo sapiens GN=ATP1A1 PE=1 SV=1	2	616.333	1	AVAGDASESALLK	3345.56	406.214	10539.2	1211.62	1593.78
P05023	AT1A1	Sodium\potassium-transporting ATPase subunit alpha-1 OS=Homo sapiens GN=ATP1A1 PE=1 SV=1	2	631.344	1	IVEIPFNSTNK	9166.35	2688.72	5786.27	28547	83355.7
P05023	AT1A1	Sodium\potassium-transporting ATPase subunit alpha-1 OS=Homo sapiens GN=ATP1A1 PE=1 SV=1	2	760.357	1	SPDFTNENPLETR	2031.71	63853.3	5209.13	4177.96	1456.32
P05023	AT1A1	Sodium\potassium-transporting ATPase subunit alpha-1 OS=Homo sapiens GN=ATP1A1 PE=1 SV=1	2	760.357	1	SPDFTNENPLETR	3147.47	1964.57	95253.1	11016.5	8270.56
P05023	AT1A1	Sodium\potassium-transporting ATPase subunit alpha-1 OS=Homo sapiens GN=ATP1A1 PE=1 SV=1	2	760.357	1	SPDFTNENPLETR	5417.83	3466.86	3775.76	821.632	97258
P05023	AT1A1	Sodium\potassium-transporting ATPase subunit alpha-1 OS=Homo sapiens GN=ATP1A1 PE=1 SV=1	2	760.357	1	SPDFTNENPLETR	3064.23	1308.12	6224.9	57184.1	1580.69
P05023	AT1A1	Sodium\potassium-transporting ATPase subunit alpha-1 OS=Homo sapiens GN=ATP1A1 PE=1 SV=1	2	553.306	1	TSATWLALSR	2915.97	13975.4	147904	3093.34	4216.7
P05023	AT1A1	Sodium\potassium-transporting ATPase subunit alpha-1 OS=Homo sapiens GN=ATP1A1 PE=1 SV=1	2	527.753	1	NSVFQQGMK	3702.22	6043.66	6646.45	5711.73	5030.74
P05023	AT1A1	Sodium\potassium-transporting ATPase subunit alpha-1 OS=Homo sapiens GN=ATP1A1 PE=1 SV=1	2	906.481	1	QGAIVAVTGDGVNDSPALK	10.3755	26939.2	0	0.718365	0
P05023	AT1A1	Sodium\potassium-transporting ATPase subunit alpha-1 OS=Homo sapiens GN=ATP1A1 PE=1 SV=1	2	906.481	1	QGAIVAVTGDGVNDSPALK	663.463	1158.45	37059.5	40.3438	213.395
P05023	AT1A1	Sodium\potassium-transporting ATPase subunit alpha-1 OS=Homo sapiens GN=ATP1A1 PE=1 SV=1	2	753.883	1	ADIGVAMGIAGSDVSK	7041.91	24750	2037.7	1562.87	2206.44
P05023	AT1A1	Sodium\potassium-transporting ATPase subunit alpha-1 OS=Homo sapiens GN=ATP1A1 PE=1 SV=1	2	915.468	1	GVGIISEGNETVEDIAAR	16111.3	62186.2	3219.76	5309.97	1957.88
P05023	AT1A1	Sodium\potassium-transporting ATPase subunit alpha-1 OS=Homo sapiens GN=ATP1A1 PE=1 SV=1	2	915.467	1	GVGIISEGNETVEDIAAR	1921.46	2812.58	6259.66	2421.94	68241.1
P05023	AT1A1	Sodium\potassium-transporting ATPase subunit alpha-1 OS=Homo sapiens GN=ATP1A1 PE=1 SV=1	2	792.944	1	AVFQANQENLPILK	1687.59	16280.2	0	414.434	0
P05023	AT1A1	Sodium\potassium-transporting ATPase subunit alpha-1 OS=Homo sapiens GN=ATP1A1 PE=1 SV=1	2	1240.61	1	QAADMILLDDNFASIVTGVEEGR	1374.52	10258.8	0	415.512	0
P02649	APOE	Apolipoprotein E OS=Homo sapiens GN=APOE PE=1 SV=1	2	484.781	1	LGPLVEQGR	18304.7	15673.2	67924.2	64653.9	50246.8
P02649	APOE	Apolipoprotein E OS=Homo sapiens GN=APOE PE=1 SV=1	2	484.781	1	LGPLVEQGR	5528.38	1148.53	54079	1799	10838.2
P02649	APOE	Apolipoprotein E OS=Homo sapiens GN=APOE PE=1 SV=1	2	474.767	1	LAVYQAGAR	5417.1	5442.62	35948.6	31182	46038.1
P02649	APOE	Apolipoprotein E OS=Homo sapiens GN=APOE PE=1 SV=1	2	474.769	1	LAVYQAGAR	931.185	6392.05	20923.6	4042.77	215.292
P02649	APOE	Apolipoprotein E OS=Homo sapiens GN=APOE PE=1 SV=1	3	438.578	1	AKLEEQAQQIR	4799.69	2929.8	17864.1	22934	8418.37
P02649	APOE	Apolipoprotein E OS=Homo sapiens GN=APOE PE=1 SV=1	3	438.579	1	AKLEEQAQQIR	1349.62	0	433.478	28.7577	68788.6
P02649	APOE	Apolipoprotein E OS=Homo sapiens GN=APOE PE=1 SV=1	3	698.353	1	AYKSELEEQLTPVAEETR	10054.2	1889.72	97511.1	1284.54	1246.03
P02649	APOE	Apolipoprotein E OS=Homo sapiens GN=APOE PE=1 SV=1	2	865.928	1	SELEEQLTPVAEETR	4121.34	2958.54	126536	1744.01	1166.3
P02649	APOE	Apolipoprotein E OS=Homo sapiens GN=APOE PE=1 SV=1	2	865.927	1	SELEEQLTPVAEETR	2524.05	2106.64	840.781	7943.62	143550
P02649	APOE	Apolipoprotein E OS=Homo sapiens GN=APOE PE=1 SV=1	2	832.404	1	GEVQAMLGQSTEELR	17690.4	10080.6	115425	1911.01	14409.9
P02649	APOE	Apolipoprotein E OS=Homo sapiens GN=APOE PE=1 SV=1	2	832.404	1	GEVQAMLGQSTEELR	4290.77	9674.41	793.377	6680.8	98005
P02649	APOE	Apolipoprotein E OS=Homo sapiens GN=APOE PE=1 SV=1	2	832.404	1	GEVQAMLGQSTEELR	2412.67	1842.99	8746.49	66889.5	1506.84
P02649	APOE	Apolipoprotein E OS=Homo sapiens GN=APOE PE=1 SV=1	3	910.801	1	WVQTLSEQVQEELLSSQVTQELR	1308.22	5944.46	917.586	59020.3	9804.34
P02649	APOE	Apolipoprotein E OS=Homo sapiens GN=APOE PE=1 SV=1	3	910.804	1	WVQTLSEQVQEELLSSQVTQELR	1449.27	1184.73	35296.5	1260.91	1999.98
P02649	APOE	Apolipoprotein E OS=Homo sapiens GN=APOE PE=1 SV=1	3	910.806	1	WVQTLSEQVQEELLSSQVTQELR	14455	633.853	1109.02	1907.79	720.381
P02649	APOE	Apolipoprotein E OS=Homo sapiens GN=APOE PE=1 SV=1	2	810.904	1	VQAAVGTSAAPVPSDNH	1593.33	14157.5	1132.73	1301.21	80736.8
P02649	APOE	Apolipoprotein E OS=Homo sapiens GN=APOE PE=1 SV=1	2	810.902	1	VQAAVGTSAAPVPSDNH	586.864	3369.42	68841.2	177.338	17987.3
P02649	APOE	Apolipoprotein E OS=Homo sapiens GN=APOE PE=1 SV=1	2	810.904	1	VQAAVGTSAAPVPSDNH	1041.92	614.046	38.678	28538.7	44.097
Q15084	PDIA6	Protein disulfide-isomerase A6 OS=Homo sapiens GN=PDIA6 PE=1 SV=1	2	576.253	1	GESPVDYDGGR	113507	67353.9	97487.7	75331.8	91680.8
Q15084	PDIA6	Protein disulfide-isomerase A6 OS=Homo sapiens GN=PDIA6 PE=1 SV=1	2	808.427	1	GSTAPVGGGAFPTIVER	1196.24	226701	26806	1464.15	6233.33
Q15084	PDIA6	Protein disulfide-isomerase A6 OS=Homo sapiens GN=PDIA6 PE=1 SV=1	2	808.427	1	GSTAPVGGGAFPTIVER	367740	4537.93	5420.89	2345.71	939.923
Q15084	PDIA6	Protein disulfide-isomerase A6 OS=Homo sapiens GN=PDIA6 PE=1 SV=1	2	764.428	1	LAAVDATVNQVLASR	59019.1	8547.43	555818	1464.09	705.502
Q15084	PDIA6	Protein disulfide-isomerase A6 OS=Homo sapiens GN=PDIA6 PE=1 SV=1	2	764.43	1	LAAVDATVNQVLASR	3251.74	3942.52	29130.3	14047	524013
Q15084	PDIA6	Protein disulfide-isomerase A6 OS=Homo sapiens GN=PDIA6 PE=1 SV=1	2	764.43	1	LAAVDATVNQVLASR	4453.29	3142.5	7012.53	382859	16041.4
Q15084	PDIA6	Protein disulfide-isomerase A6 OS=Homo sapiens GN=PDIA6 PE=1 SV=1	2	764.43	1	LAAVDATVNQVLASR	400230	15917.4	102357	18760.5	69578.5
Q15084	PDIA6	Protein disulfide-isomerase A6 OS=Homo sapiens GN=PDIA6 PE=1 SV=1	2	764.43	1	LAAVDATVNQVLASR	589.184	193663	5253.09	24754	24970.9
Q15084	PDIA6	Protein disulfide-isomerase A6 OS=Homo sapiens GN=PDIA6 PE=1 SV=1	3	509.955	1	LAAVDATVNQVLASR	738.2	100.304	50909	125.696	1488.79
Q15084	PDIA6	Protein disulfide-isomerase A6 OS=Homo sapiens GN=PDIA6 PE=1 SV=1	3	509.956	1	LAAVDATVNQVLASR	1541.12	2.43633	264.858	3838.53	55721
Q15084	PDIA6	Protein disulfide-isomerase A6 OS=Homo sapiens GN=PDIA6 PE=1 SV=1	3	509.956	1	LAAVDATVNQVLASR	35440.7	3457.09	3259.71	5268.99	8246.35
Q15084	PDIA6	Protein disulfide-isomerase A6 OS=Homo sapiens GN=PDIA6 PE=1 SV=1	3	509.956	1	LAAVDATVNQVLASR	861.865	20299.6	3874.66	696.486	5448.21
Q15084	PDIA6	Protein disulfide-isomerase A6 OS=Homo sapiens GN=PDIA6 PE=1 SV=1	2	693.885	1	TGEAIVDAALSALR	181.147	95.8665	497.997	207046	1294.5
Q15084	PDIA6	Protein disulfide-isomerase A6 OS=Homo sapiens GN=PDIA6 PE=1 SV=1	2	693.886	1	TGEAIVDAALSALR	198510	4178.77	32953.3	422.931	14967.3
Q15084	PDIA6	Protein disulfide-isomerase A6 OS=Homo sapiens GN=PDIA6 PE=1 SV=1	2	693.886	1	TGEAIVDAALSALR	4095.42	117756	3238.5	12288.6	6988.98
Q15084	PDIA6	Protein disulfide-isomerase A6 OS=Homo sapiens GN=PDIA6 PE=1 SV=1	2	693.884	1	TGEAIVDAALSALR	146.646	9.82403	109756	0	269.289
Q15084	PDIA6	Protein disulfide-isomerase A6 OS=Homo sapiens GN=PDIA6 PE=1 SV=1	3	462.927	1	TGEAIVDAALSALR	56.8095	11523.5	999.607	6849.16	4778.76
Q15084	PDIA6	Protein disulfide-isomerase A6 OS=Homo sapiens GN=PDIA6 PE=1 SV=1	3	462.926	1	TGEAIVDAALSALR	5.65009	0	0	18826.5	0
Q15084	PDIA6	Protein disulfide-isomerase A6 OS=Homo sapiens GN=PDIA6 PE=1 SV=1	2	596.28	1	NRPEDYQGGR	16195.6	11091.8	12685.6	13682	7671.36
Q15084	PDIA6	Protein disulfide-isomerase A6 OS=Homo sapiens GN=PDIA6 PE=1 SV=1	3	397.856	1	NRPEDYQGGR	9025.59	5550.39	6996.93	8664.08	5376.04
Q15084	PDIA6	Protein disulfide-isomerase A6 OS=Homo sapiens GN=PDIA6 PE=1 SV=1	2	742.364	1	GSFSEQGINEFLR	2606.63	4317.74	261834	11918	48362.5
Q15084	PDIA6	Protein disulfide-isomerase A6 OS=Homo sapiens GN=PDIA6 PE=1 SV=1	2	742.364	1	GSFSEQGINEFLR	10050.2	4179	2801.17	214913	8576.51
Q15084	PDIA6	Protein disulfide-isomerase A6 OS=Homo sapiens GN=PDIA6 PE=1 SV=1	2	742.365	1	GSFSEQGINEFLR	4527.86	2073.2	16435.1	6895.47	185475
Q15084	PDIA6	Protein disulfide-isomerase A6 OS=Homo sapiens GN=PDIA6 PE=1 SV=1	2	742.365	1	GSFSEQGINEFLR	216733	10084.7	20693.4	3833.1	17787.7
Q15084	PDIA6	Protein disulfide-isomerase A6 OS=Homo sapiens GN=PDIA6 PE=1 SV=1	2	742.364	1	GSFSEQGINEFLR	22966.7	100536	2563.05	9201.29	357.85
Q15084	PDIA6	Protein disulfide-isomerase A6 OS=Homo sapiens GN=PDIA6 PE=1 SV=1	2	742.365	1	GSFSEQGINEFLR	636.27	13535.1	1288.46	829.433	22.0335
Q15084	PDIA6	Protein disulfide-isomerase A6 OS=Homo sapiens GN=PDIA6 PE=1 SV=1	2	508.311	1	AATALKDVVK	23603.8	19612.4	12960.1	21321.3	7773.59
Q15084	PDIA6	Protein disulfide-isomerase A6 OS=Homo sapiens GN=PDIA6 PE=1 SV=1	2	539.812	1	NSYLEVLLK	60.8035	2.07584	83782.3	158.104	1565.79
Q15084	PDIA6	Protein disulfide-isomerase A6 OS=Homo sapiens GN=PDIA6 PE=1 SV=1	2	539.812	1	NSYLEVLLK	1337.55	24008.8	3538.77	576.091	106.947
Q15084	PDIA6	Protein disulfide-isomerase A6 OS=Homo sapiens GN=PDIA6 PE=1 SV=1	2	539.812	1	NSYLEVLLK	2328.2	86.3661	4913.56	85351.7	220.841
Q15084	PDIA6	Protein disulfide-isomerase A6 OS=Homo sapiens GN=PDIA6 PE=1 SV=1	2	539.812	1	NSYLEVLLK	82999.7	693.345	1926.75	8574.52	3273.71
Q15084	PDIA6	Protein disulfide-isomerase A6 OS=Homo sapiens GN=PDIA6 PE=1 SV=1	2	539.812	1	NSYLEVLLK	119.072	48.9042	151.434	763.249	87345
Q15084	PDIA6	Protein disulfide-isomerase A6 OS=Homo sapiens GN=PDIA6 PE=1 SV=1	3	556.606	1	IFQKGESPVDYDGGR	38443.2	33814.5	502.585	256.766	921.056
Q15084	PDIA6	Protein disulfide-isomerase A6 OS=Homo sapiens GN=PDIA6 PE=1 SV=1	3	556.608	1	IFQKGESPVDYDGGR	441.848	221.562	15309.4	764.342	72923.2
Q15084	PDIA6	Protein disulfide-isomerase A6 OS=Homo sapiens GN=PDIA6 PE=1 SV=1	3	556.607	1	IFQKGESPVDYDGGR	1636.83	693.369	6991.73	70200.8	1522.07
Q15084	PDIA6	Protein disulfide-isomerase A6 OS=Homo sapiens GN=PDIA6 PE=1 SV=1	3	556.607	1	IFQKGESPVDYDGGR	142.422	0	43086.7	272.324	1563.76
Q15084	PDIA6	Protein disulfide-isomerase A6 OS=Homo sapiens GN=PDIA6 PE=1 SV=1	5	517.071	1	VGAVDADKHHSLGGQYGVQGFPTIK	2676.51	28219.6	829.562	2336.15	905.955
Q15084	PDIA6	Protein disulfide-isomerase A6 OS=Homo sapiens GN=PDIA6 PE=1 SV=1	3	920.098	1	DGELPVEDDIDLSDVELDDLGKDEL	2422.52	55357.6	15671.3	4233.09	10016.2
Q15084	PDIA6	Protein disulfide-isomerase A6 OS=Homo sapiens GN=PDIA6 PE=1 SV=1	3	920.098	1	DGELPVEDDIDLSDVELDDLGKDEL	71609	915.986	2643.85	1065.75	1766.25
Q15084	PDIA6	Protein disulfide-isomerase A6 OS=Homo sapiens GN=PDIA6 PE=1 SV=1	3	920.097	1	DGELPVEDDIDLSDVELDDLGKDEL	1080.8	577.377	2125.68	73211.6	1949.68
Q15084	PDIA6	Protein disulfide-isomerase A6 OS=Homo sapiens GN=PDIA6 PE=1 SV=1	2	1379.64	1	DGELPVEDDIDLSDVELDDLGKDEL	285.812	512.304	93062.4	401.781	0
Q15084	PDIA6	Protein disulfide-isomerase A6 OS=Homo sapiens GN=PDIA6 PE=1 SV=1	2	1379.64	1	DGELPVEDDIDLSDVELDDLGKDEL	795.66	48472.7	0	16.7985	0
Q15084	PDIA6	Protein disulfide-isomerase A6 OS=Homo sapiens GN=PDIA6 PE=1 SV=1	2	1379.64	1	DGELPVEDDIDLSDVELDDLGKDEL	77583.6	474.38	276.483	0	200.475
Q15084	PDIA6	Protein disulfide-isomerase A6 OS=Homo sapiens GN=PDIA6 PE=1 SV=1	2	1379.64	1	DGELPVEDDIDLSDVELDDLGKDEL	880.792	497.804	424.79	72494.9	276.866
Q15084	PDIA6	Protein disulfide-isomerase A6 OS=Homo sapiens GN=PDIA6 PE=1 SV=1	2	1379.64	1	DGELPVEDDIDLSDVELDDLGKDEL	475.069	144.788	403.623	237.126	80917.6
Q15084	PDIA6	Protein disulfide-isomerase A6 OS=Homo sapiens GN=PDIA6 PE=1 SV=1	2	757.882	1	NLEPEWAAAASEVK	3480.05	515.859	49262.1	4271.56	1571.61
Q15084	PDIA6	Protein disulfide-isomerase A6 OS=Homo sapiens GN=PDIA6 PE=1 SV=1	3	1166.87	1	EPWDGRDGELPVEDDIDLSDVELDDLGKDEL	3770.97	23035.2	27248.5	15422.1	35561.4
Q15084	PDIA6	Protein disulfide-isomerase A6 OS=Homo sapiens GN=PDIA6 PE=1 SV=1	3	882.782	1	TCEEHQLCVVAVLPHILDTGAAGR	46718	1287.25	907.998	1400.6	2522.6
P27824	CALX	Calnexin OS=Homo sapiens GN=CANX PE=1 SV=2	3	450.226	1	AKKDDTDDEIAK	14390.4	9230.56	14081.9	15823.4	8419
P27824	CALX	Calnexin OS=Homo sapiens GN=CANX PE=1 SV=2	2	885.923	1	APVPTGEVYFADSFDR	631542	9958.17	4781.24	24488.6	6742.54
P27824	CALX	Calnexin OS=Homo sapiens GN=CANX PE=1 SV=2	2	885.922	1	APVPTGEVYFADSFDR	18400.7	300456	10050	117549	7617.16
P27824	CALX	Calnexin OS=Homo sapiens GN=CANX PE=1 SV=2	2	885.923	1	APVPTGEVYFADSFDR	1526.75	5263.5	13564.1	5818.59	610230
P27824	CALX	Calnexin OS=Homo sapiens GN=CANX PE=1 SV=2	2	885.921	1	APVPTGEVYFADSFDR	2003.14	2177.87	620496	2762.85	8588.45
P27824	CALX	Calnexin OS=Homo sapiens GN=CANX PE=1 SV=2	2	885.923	1	APVPTGEVYFADSFDR	2506.88	7725.52	17332.9	484764	12926.1
P27824	CALX	Calnexin OS=Homo sapiens GN=CANX PE=1 SV=2	3	590.951	1	APVPTGEVYFADSFDR	229.861	671.442	745.943	30112.7	8414.92
P27824	CALX	Calnexin OS=Homo sapiens GN=CANX PE=1 SV=2	3	590.951	1	APVPTGEVYFADSFDR	213.723	16654.9	1421.22	1493	274.717
P27824	CALX	Calnexin OS=Homo sapiens GN=CANX PE=1 SV=2	3	590.951	1	APVPTGEVYFADSFDR	37.1747	55.4252	5282.55	1162.44	32248.8
P27824	CALX	Calnexin OS=Homo sapiens GN=CANX PE=1 SV=2	2	531.304	1	GTLSGWILSK	198.681	31452.9	2240.73	7034.34	1654.32
P27824	CALX	Calnexin OS=Homo sapiens GN=CANX PE=1 SV=2	2	531.305	1	GTLSGWILSK	4412.21	111.737	82722.3	565.069	902.922
P27824	CALX	Calnexin OS=Homo sapiens GN=CANX PE=1 SV=2	2	531.304	1	GTLSGWILSK	6210.03	978.728	4107.72	71006.2	5796.49
P27824	CALX	Calnexin OS=Homo sapiens GN=CANX PE=1 SV=2	2	531.304	1	GTLSGWILSK	82563	1087.04	199.409	68.1548	512.521
P27824	CALX	Calnexin OS=Homo sapiens GN=CANX PE=1 SV=2	2	544.766	1	AEEDEILNR	18297.1	12971.9	16764.2	12868	15234.8
P27824	CALX	Calnexin OS=Homo sapiens GN=CANX PE=1 SV=2	3	486.241	1	TPELNLDQFHDK	0	19567.4	217.386	47.965	70.9965
P27824	CALX	Calnexin OS=Homo sapiens GN=CANX PE=1 SV=2	3	486.242	1	TPELNLDQFHDK	69.0987	0	55598.1	1141.85	19527.3
P27824	CALX	Calnexin OS=Homo sapiens GN=CANX PE=1 SV=2	3	486.242	1	TPELNLDQFHDK	45512.8	233.517	4805.04	9457.2	515.435
P27824	CALX	Calnexin OS=Homo sapiens GN=CANX PE=1 SV=2	3	816.384	1	CESAPGCGVWQRPVIDNPNYK	2055.96	38071.5	2828	1512.22	15223.7
P27824	CALX	Calnexin OS=Homo sapiens GN=CANX PE=1 SV=2	3	816.381	1	CESAPGCGVWQRPVIDNPNYK	9857.06	612.698	145406	3281.87	16077.8
P27824	CALX	Calnexin OS=Homo sapiens GN=CANX PE=1 SV=2	3	816.383	1	CESAPGCGVWQRPVIDNPNYK	20070.6	3752.78	9828.51	131130	630.597
P27824	CALX	Calnexin OS=Homo sapiens GN=CANX PE=1 SV=2	3	631.614	1	DKGDEEEEGEEKLEEK	18629.2	17174.7	810.995	6410.56	699.684
P27824	CALX	Calnexin OS=Homo sapiens GN=CANX PE=1 SV=2	3	703.335	1	IPDPEAVKPDDWDEDAPAK	2050.5	1342.57	155304	12726.2	5348.87
P27824	CALX	Calnexin OS=Homo sapiens GN=CANX PE=1 SV=2	3	703.335	1	IPDPEAVKPDDWDEDAPAK	993.426	24936.3	2640.01	913.512	641.51
P27824	CALX	Calnexin OS=Homo sapiens GN=CANX PE=1 SV=2	3	703.335	1	IPDPEAVKPDDWDEDAPAK	105790	17582.9	5106.45	8948.45	5786.22
P27824	CALX	Calnexin OS=Homo sapiens GN=CANX PE=1 SV=2	3	703.334	1	IPDPEAVKPDDWDEDAPAK	444.352	1993.62	2767.36	4224.38	48202.2
P27824	CALX	Calnexin OS=Homo sapiens GN=CANX PE=1 SV=2	3	621.983	1	KIPNPDFFEDLEPFR	3908.33	38171.6	37904.9	7108.91	7828.71
P27824	CALX	Calnexin OS=Homo sapiens GN=CANX PE=1 SV=2	3	621.982	1	KIPNPDFFEDLEPFR	124.234	35.1077	128.501	23072.8	10472.8
P27824	CALX	Calnexin OS=Homo sapiens GN=CANX PE=1 SV=2	3	434.581	1	LPGDKGLVLMSR	591.906	52.2203	867.923	27054.4	2239.29
P50454	SERPH	Serpin H1 OS=Homo sapiens GN=SERPINH1 PE=1 SV=2	2	647.345	1	DTQSGSLLFIGR	127308	12076.5	23067.2	26283.4	11196.4
P50454	SERPH	Serpin H1 OS=Homo sapiens GN=SERPINH1 PE=1 SV=2	2	612.833	1	GVVEVTHDLQK	76758.6	75522.1	12726	74868.4	105.899
P50454	SERPH	Serpin H1 OS=Homo sapiens GN=SERPINH1 PE=1 SV=2	2	612.834	1	GVVEVTHDLQK	647.26	504.1	8523.47	698.628	208892
P50454	SERPH	Serpin H1 OS=Homo sapiens GN=SERPINH1 PE=1 SV=2	2	612.834	1	GVVEVTHDLQK	9379.2	1063.38	146796	1297.16	3497.94
P50454	SERPH	Serpin H1 OS=Homo sapiens GN=SERPINH1 PE=1 SV=2	3	546.584	1	TGLYNYYDDEKEK	69550	57479	386.134	1395.39	639.047
P50454	SERPH	Serpin H1 OS=Homo sapiens GN=SERPINH1 PE=1 SV=2	3	546.584	1	TGLYNYYDDEKEK	2514.16	194.031	963.377	134768	297.086
P50454	SERPH	Serpin H1 OS=Homo sapiens GN=SERPINH1 PE=1 SV=2	2	819.372	1	TGLYNYYDDEKEK	12637.5	13183.8	114.68	46.7596	88.8615
P50454	SERPH	Serpin H1 OS=Homo sapiens GN=SERPINH1 PE=1 SV=2	2	830.407	1	LYGPSSVSFADDFVR	3284.82	2642.83	697936	3631.25	2155.86
P50454	SERPH	Serpin H1 OS=Homo sapiens GN=SERPINH1 PE=1 SV=2	2	830.407	1	LYGPSSVSFADDFVR	30100.7	9332.94	38535.3	515643	18011.8
P50454	SERPH	Serpin H1 OS=Homo sapiens GN=SERPINH1 PE=1 SV=2	2	830.407	1	LYGPSSVSFADDFVR	3624.39	2799.96	8707.49	16116.2	600925
P50454	SERPH	Serpin H1 OS=Homo sapiens GN=SERPINH1 PE=1 SV=2	2	830.408	1	LYGPSSVSFADDFVR	23817	218916	12567.9	4159.89	38128.3
P50454	SERPH	Serpin H1 OS=Homo sapiens GN=SERPINH1 PE=1 SV=2	2	830.407	1	LYGPSSVSFADDFVR	300194	3961.18	25257.2	8705.51	15356.4
P50454	SERPH	Serpin H1 OS=Homo sapiens GN=SERPINH1 PE=1 SV=2	3	829.765	1	SALQSINEWAAQTTDGKLPEVTK	4794.65	353.385	14318	277895	12634.4
P50454	SERPH	Serpin H1 OS=Homo sapiens GN=SERPINH1 PE=1 SV=2	3	829.766	1	SALQSINEWAAQTTDGKLPEVTK	2554.71	884.526	296249	2839.93	2699.55
P50454	SERPH	Serpin H1 OS=Homo sapiens GN=SERPINH1 PE=1 SV=2	3	829.765	1	SALQSINEWAAQTTDGKLPEVTK	7384.21	142143	3534.63	22196.8	16751.7
P50454	SERPH	Serpin H1 OS=Homo sapiens GN=SERPINH1 PE=1 SV=2	3	829.765	1	SALQSINEWAAQTTDGKLPEVTK	170530	1501.56	11979	4224.23	16892.7
P50454	SERPH	Serpin H1 OS=Homo sapiens GN=SERPINH1 PE=1 SV=2	2	463.806	1	KAVAISLPK	23858.5	20364.8	13146.8	25250.5	824.944
P50454	SERPH	Serpin H1 OS=Homo sapiens GN=SERPINH1 PE=1 SV=2	2	463.807	1	KAVAISLPK	0	0	22.3122	51.4455	54105.8
P50454	SERPH	Serpin H1 OS=Homo sapiens GN=SERPINH1 PE=1 SV=2	2	463.806	1	KAVAISLPK	28.3882	9.0264	41859.8	0	0
P50454	SERPH	Serpin H1 OS=Homo sapiens GN=SERPINH1 PE=1 SV=2	2	737.375	1	SAGLAFSLYQAMAK	9390.4	2755.36	331984	6026.34	8121.35
P50454	SERPH	Serpin H1 OS=Homo sapiens GN=SERPINH1 PE=1 SV=2	2	737.376	1	SAGLAFSLYQAMAK	3325.17	60854.3	7120.03	43174.2	323669
P50454	SERPH	Serpin H1 OS=Homo sapiens GN=SERPINH1 PE=1 SV=2	2	737.377	1	SAGLAFSLYQAMAK	1529.15	45569.9	5768.12	880.123	6235.41
P50454	SERPH	Serpin H1 OS=Homo sapiens GN=SERPINH1 PE=1 SV=2	2	737.376	1	SAGLAFSLYQAMAK	4805.39	20285.2	5190.48	218846	2680.54
P50454	SERPH	Serpin H1 OS=Homo sapiens GN=SERPINH1 PE=1 SV=2	2	737.376	1	SAGLAFSLYQAMAK	104160	3502.34	21312.4	5916.61	10612.2
P50454	SERPH	Serpin H1 OS=Homo sapiens GN=SERPINH1 PE=1 SV=2	3	527.299	1	HLAGLGLTEAIDKNK	1251.3	50241.6	1166.9	37.5191	39.5678
P50454	SERPH	Serpin H1 OS=Homo sapiens GN=SERPINH1 PE=1 SV=2	3	527.3	1	HLAGLGLTEAIDKNK	1405.78	149.56	17756.9	122241	4283.71
P50454	SERPH	Serpin H1 OS=Homo sapiens GN=SERPINH1 PE=1 SV=2	3	527.3	1	HLAGLGLTEAIDKNK	82648.4	1395.01	11986.8	5859.47	4893.49
P50454	SERPH	Serpin H1 OS=Homo sapiens GN=SERPINH1 PE=1 SV=2	3	527.3	1	HLAGLGLTEAIDKNK	62.0886	378.566	33497.8	270.363	113.438
P50454	SERPH	Serpin H1 OS=Homo sapiens GN=SERPINH1 PE=1 SV=2	3	527.298	1	HLAGLGLTEAIDKNK	727.962	16501.8	6233.2	7117.5	858378
P50454	SERPH	Serpin H1 OS=Homo sapiens GN=SERPINH1 PE=1 SV=2	2	591.829	1	KPAAAAAPGTAEK	4064.83	4212.22	13541.3	8775.14	13880.6
P50454	SERPH	Serpin H1 OS=Homo sapiens GN=SERPINH1 PE=1 SV=2	2	493.786	1	AVLSAEQLR	13409.4	7437.72	12451.5	10193.1	137.565
P50454	SERPH	Serpin H1 OS=Homo sapiens GN=SERPINH1 PE=1 SV=2	2	669.377	1	HLAGLGLTEAIDK	107.735	26.9367	39.4805	5307.8	48364.8
P50454	SERPH	Serpin H1 OS=Homo sapiens GN=SERPINH1 PE=1 SV=2	3	667.373	1	LSSLIILMPHHVEPLER	179.846	883.859	2310.48	74551	7590.66
P50454	SERPH	Serpin H1 OS=Homo sapiens GN=SERPINH1 PE=1 SV=2	3	667.373	1	LSSLIILMPHHVEPLER	3957.9	46887.5	4230.98	3129.96	1600.51
P50454	SERPH	Serpin H1 OS=Homo sapiens GN=SERPINH1 PE=1 SV=2	3	426.912	1	LQIVEMPLAHK	40.5074	9.11879	15558.6	1.34989	28816.4
P50454	SERPH	Serpin H1 OS=Homo sapiens GN=SERPINH1 PE=1 SV=2	3	426.914	1	LQIVEMPLAHK	36.0237	0	0	6276.52	0
P50454	SERPH	Serpin H1 OS=Homo sapiens GN=SERPINH1 PE=1 SV=2	3	802.446	1	AVLSAEQLRDEEVHAGLGELLR	5604.49	480.17	8947.14	53583.2	49170
P50454	SERPH	Serpin H1 OS=Homo sapiens GN=SERPINH1 PE=1 SV=2	3	802.428	1	AVLSAEQLRDEEVHAGLGELLR	16473.1	51357.7	692.28	36937.1	19072.4
P50454	SERPH	Serpin H1 OS=Homo sapiens GN=SERPINH1 PE=1 SV=2	3	802.437	1	AVLSAEQLRDEEVHAGLGELLR	34905.6	4391.41	10900.4	1616.08	367.985
P50454	SERPH	Serpin H1 OS=Homo sapiens GN=SERPINH1 PE=1 SV=2	2	729.378	1	SAGLAFSLYQAMAK	2077.35	490.685	6061.07	23870.2	2740.51
P14625	ENPL	Endoplasmin OS=Homo sapiens GN=HSP90B1 PE=1 SV=1	2	497.267	1	SGYLLPDTK	33550.1	20834.3	18392.8	26118.7	2296.29
P14625	ENPL	Endoplasmin OS=Homo sapiens GN=HSP90B1 PE=1 SV=1	2	743.383	1	GVVDSDDLPLNVSR	312.176	57719.2	397.708	1416.82	356.993
P14625	ENPL	Endoplasmin OS=Homo sapiens GN=HSP90B1 PE=1 SV=1	2	743.381	1	GVVDSDDLPLNVSR	9286.23	14465.5	2429.69	81129.4	3113.86
P14625	ENPL	Endoplasmin OS=Homo sapiens GN=HSP90B1 PE=1 SV=1	2	743.382	1	GVVDSDDLPLNVSR	66735.8	3565.59	26741	1492.93	2201.13
P14625	ENPL	Endoplasmin OS=Homo sapiens GN=HSP90B1 PE=1 SV=1	2	645.305	1	DISTNYYASQK	18363.9	13683.6	17627.6	12896.2	6800.01
P14625	ENPL	Endoplasmin OS=Homo sapiens GN=HSP90B1 PE=1 SV=1	2	594.343	1	SILFVPTSAPR	845.66	30.8303	54234.6	406.318	34701.6
P14625	ENPL	Endoplasmin OS=Homo sapiens GN=HSP90B1 PE=1 SV=1	2	594.344	1	SILFVPTSAPR	872.27	579.272	5422.02	1052.72	64115.4
P14625	ENPL	Endoplasmin OS=Homo sapiens GN=HSP90B1 PE=1 SV=1	2	594.344	1	SILFVPTSAPR	4440.22	5406.97	4266.47	51552.8	4312.31
P14625	ENPL	Endoplasmin OS=Homo sapiens GN=HSP90B1 PE=1 SV=1	2	638.327	1	ELISNASDALDK	30382.1	20501.7	820.025	1860.98	751.873
P14625	ENPL	Endoplasmin OS=Homo sapiens GN=HSP90B1 PE=1 SV=1	2	541.276	1	FAFQAEVNR	10057.3	2696.97	19710.2	6899.85	49952.1
P14625	ENPL	Endoplasmin OS=Homo sapiens GN=HSP90B1 PE=1 SV=1	2	541.279	1	FAFQAEVNR	8142.39	104.635	16483.9	1121.63	526.797
P14625	ENPL	Endoplasmin OS=Homo sapiens GN=HSP90B1 PE=1 SV=1	2	516.253	1	IYFMAGSSR	7582.72	2781.34	2441.1	2126.86	638.759
P14625	ENPL	Endoplasmin OS=Homo sapiens GN=HSP90B1 PE=1 SV=1	3	791.365	1	LTESPCALVASQYGWSGNMER	805.152	13052.5	15294	1409.32	1551.77
Q9Y4L1	HYOU1	Hypoxia up-regulated protein 1 OS=Homo sapiens GN=HYOU1 PE=1 SV=1	3	432.604	1	LPATEKPVLLSK	15799.1	12112.3	0.140175	43.654	11.0841
Q9Y4L1	HYOU1	Hypoxia up-regulated protein 1 OS=Homo sapiens GN=HYOU1 PE=1 SV=1	2	524.283	1	LAGLFNEQR	280.049	61.6986	2260.7	3186.66	30885.7
Q9Y4L1	HYOU1	Hypoxia up-regulated protein 1 OS=Homo sapiens GN=HYOU1 PE=1 SV=1	3	575.013	1	VAIVKPGVPMEIVLNK	270.639	778.528	377.133	981.144	39685.6
Q9Y4L1	HYOU1	Hypoxia up-regulated protein 1 OS=Homo sapiens GN=HYOU1 PE=1 SV=1	2	643.831	1	EAGMQPQLQIR	4492.86	5178.41	6161.87	8825.56	543.469
Q9Y4L1	HYOU1	Hypoxia up-regulated protein 1 OS=Homo sapiens GN=HYOU1 PE=1 SV=1	3	699.01	1	NINADEAAAMGAVYQAAALSK	382.593	2036.21	23189.1	15856.2	2994.12
Q9Y4L1	HYOU1	Hypoxia up-regulated protein 1 OS=Homo sapiens GN=HYOU1 PE=1 SV=1	2	761.422	1	DAVVYPILVEFTR	1488.41	12689.6	7535.14	7888.16	3807.07
Q9Y4L1	HYOU1	Hypoxia up-regulated protein 1 OS=Homo sapiens GN=HYOU1 PE=1 SV=1	3	699.046	1	VLQLINDNTATALSYGVFR	245.963	606.68	602.213	13540.1	10866.2
Q9Y4L1	HYOU1	Hypoxia up-regulated protein 1 OS=Homo sapiens GN=HYOU1 PE=1 SV=1	2	1048.07	1	VLQLINDNTATALSYGVFR	745.362	503.138	50.9973	18074.4	23.2489
Q92896	GSLG1	Golgi apparatus protein 1 OS=Homo sapiens GN=GLG1 PE=1 SV=2	2	634.771	1	FCENTQAGEGR	7307.55	7603.05	10632.8	8050.59	10396.6
Q92896	GSLG1	Golgi apparatus protein 1 OS=Homo sapiens GN=GLG1 PE=1 SV=2	3	501.909	1	VAELSSDDFHLDR	58.3631	0	849.763	71.5233	12360.7
Q92896	GSLG1	Golgi apparatus protein 1 OS=Homo sapiens GN=GLG1 PE=1 SV=2	2	847.399	1	ALNEACESVIQTACK	152.998	13191.9	470.047	142.883	113.838
Q92896	GSLG1	Golgi apparatus protein 1 OS=Homo sapiens GN=GLG1 PE=1 SV=2	2	847.411	1	ALNEACESVIQTACK	782.534	2925.14	809.869	28926.2	2002.91
Q92896	GSLG1	Golgi apparatus protein 1 OS=Homo sapiens GN=GLG1 PE=1 SV=2	2	641.362	1	LLELQYFISR	5485.4	588.981	3633.33	358.039	11377.6
Q92896	GSLG1	Golgi apparatus protein 1 OS=Homo sapiens GN=GLG1 PE=1 SV=2	3	887.074	1	TETGQELECLQDHLDDLVVECR	9400.46	151.78	973.849	512.304	983.488
P02786	TFR1	Transferrin receptor protein 1 OS=Homo sapiens GN=TFRC PE=1 SV=2	3	737.709	1	EAGSQKDENLALYVENQFR	109610	12576.8	88307	2.31329e+06	19848.3
P02786	TFR1	Transferrin receptor protein 1 OS=Homo sapiens GN=TFRC PE=1 SV=2	2	602.821	1	LLNENSYVPR	42787.7	31928.2	464.139	1587.33	191.684
P02786	TFR1	Transferrin receptor protein 1 OS=Homo sapiens GN=TFRC PE=1 SV=2	2	781.354	1	LAVDEEENADNNTK	46179.2	29908.1	14854.5	9539.09	14872.8
P02786	TFR1	Transferrin receptor protein 1 OS=Homo sapiens GN=TFRC PE=1 SV=2	2	734.912	1	SSGLPNIPVQTISR	7315.21	54638.9	672.043	223.076	3051.44
P02786	TFR1	Transferrin receptor protein 1 OS=Homo sapiens GN=TFRC PE=1 SV=2	2	734.911	1	SSGLPNIPVQTISR	81943	2052.97	7482.68	877.785	3072.05
P02786	TFR1	Transferrin receptor protein 1 OS=Homo sapiens GN=TFRC PE=1 SV=2	3	558.288	1	GFVEPDHYVVVGAQR	145.575	21943.8	81.5416	203.22	185.274
P02786	TFR1	Transferrin receptor protein 1 OS=Homo sapiens GN=TFRC PE=1 SV=2	3	558.289	1	GFVEPDHYVVVGAQR	40842.9	549.256	6607.46	6955.83	2082.63
P02786	TFR1	Transferrin receptor protein 1 OS=Homo sapiens GN=TFRC PE=1 SV=2	2	717.417	1	VSASPLLYTLIEK	49304.6	4759.24	6190.54	249.43	2270.6
P02786	TFR1	Transferrin receptor protein 1 OS=Homo sapiens GN=TFRC PE=1 SV=2	2	873.431	1	SAFSNLFGGEPLSYTR	16006.4	1648.04	14146.2	10612.6	1937.86
P02786	TFR1	Transferrin receptor protein 1 OS=Homo sapiens GN=TFRC PE=1 SV=2	2	873.431	1	SAFSNLFGGEPLSYTR	2399.43	23025.4	2140.15	2370.66	2495.77
P02786	TFR1	Transferrin receptor protein 1 OS=Homo sapiens GN=TFRC PE=1 SV=2	2	886.47	1	LVYLVENPGGYVAYSK	24829.9	0.855253	0	1629.19	0
Q14247	SRC8	Src substrate cortactin OS=Homo sapiens GN=CTTN PE=1 SV=2	2	536.26	1	SAVGFDYQGK	16284.3	14006.1	14822.7	11143.8	5917.23
Q14247	SRC8	Src substrate cortactin OS=Homo sapiens GN=CTTN PE=1 SV=2	2	544.253	1	HCSQVDSVR	6583.07	5172.96	8231.51	6591.52	5907.08
Q14247	SRC8	Src substrate cortactin OS=Homo sapiens GN=CTTN PE=1 SV=2	2	714.346	1	VDKSAVGFEYQGK	34064.4	22162.5	667.095	460.725	1336.67
Q14247	SRC8	Src substrate cortactin OS=Homo sapiens GN=CTTN PE=1 SV=2	2	553.269	1	SAVGHEYQSK	5064.14	3907.83	5452.79	4415.83	3820.72
Q14247	SRC8	Src substrate cortactin OS=Homo sapiens GN=CTTN PE=1 SV=2	3	724.328	1	GPVSGTEPEPVYSMEAADYR	671.082	585.668	20341.6	1777.45	266.269
Q14247	SRC8	Src substrate cortactin OS=Homo sapiens GN=CTTN PE=1 SV=2	2	937.944	1	NASTFEDVTQVSSAYQK	24405.6	185.781	409.678	168.513	96.472
P00505	AATM	Aspartate aminotransferase, mitochondrial OS=Homo sapiens GN=GOT2 PE=1 SV=3	2	577.767	1	DAGMQLQGYR	7808.5	11708.7	22438.8	17777.4	19494.6
P00505	AATM	Aspartate aminotransferase, mitochondrial OS=Homo sapiens GN=GOT2 PE=1 SV=3	2	725.404	1	FVTVQTISGTGALR	10082.9	4204.6	22874.9	10543.8	222144
P00505	AATM	Aspartate aminotransferase, mitochondrial OS=Homo sapiens GN=GOT2 PE=1 SV=3	2	725.407	1	FVTVQTISGTGALR	6472.96	1327.66	96308.9	1429.03	5770.8
P00505	AATM	Aspartate aminotransferase, mitochondrial OS=Homo sapiens GN=GOT2 PE=1 SV=3	2	725.407	1	FVTVQTISGTGALR	66136.2	11517.3	24587.6	4643.92	14378.2
P00505	AATM	Aspartate aminotransferase, mitochondrial OS=Homo sapiens GN=GOT2 PE=1 SV=3	2	446.257	1	IGASFLQR	5129.59	232.331	57342.8	19035.9	57507
P00505	AATM	Aspartate aminotransferase, mitochondrial OS=Homo sapiens GN=GOT2 PE=1 SV=3	2	506.753	1	VGAFTMVCK	2450.56	58.9794	1478.87	321.499	50777.3
P00505	AATM	Aspartate aminotransferase, mitochondrial OS=Homo sapiens GN=GOT2 PE=1 SV=3	2	634.373	1	IAAAILNTPDLR	1471.32	46.3109	70.3748	10353	53698.9
P00505	AATM	Aspartate aminotransferase, mitochondrial OS=Homo sapiens GN=GOT2 PE=1 SV=3	2	634.374	1	IAAAILNTPDLR	514.712	9889.37	29.5613	49.2785	53.0354
P00505	AATM	Aspartate aminotransferase, mitochondrial OS=Homo sapiens GN=GOT2 PE=1 SV=3	2	634.374	1	IAAAILNTPDLR	709.482	1422.24	31526.9	822.247	1698.07
P07355	ANXA2	Annexin A2 OS=Homo sapiens GN=ANXA2 PE=1 SV=2	2	611.802	1	TPAQYDASELK	60222.4	52076	64455.7	49815.1	32070.9
P07355	ANXA2	Annexin A2 OS=Homo sapiens GN=ANXA2 PE=1 SV=2	2	611.804	1	TPAQYDASELK	5170.01	13711.1	10150.4	45933.3	77862
P07355	ANXA2	Annexin A2 OS=Homo sapiens GN=ANXA2 PE=1 SV=2	2	622.815	1	TNQELQEINR	42730.3	43320.7	46308.4	43786.1	49102.9
P07355	ANXA2	Annexin A2 OS=Homo sapiens GN=ANXA2 PE=1 SV=2	2	556.282	1	QDIAFAYQR	23678.3	26923.6	251.139	4673.93	201.117
P07355	ANXA2	Annexin A2 OS=Homo sapiens GN=ANXA2 PE=1 SV=2	2	556.282	1	QDIAFAYQR	645.638	574.824	45420.2	989.472	1858.98
P07355	ANXA2	Annexin A2 OS=Homo sapiens GN=ANXA2 PE=1 SV=2	3	647.327	1	TDLEKDIISDTSGDFRK	20755.1	27491.9	12931.6	2721.93	14693.2
P07355	ANXA2	Annexin A2 OS=Homo sapiens GN=ANXA2 PE=1 SV=2	3	647.325	1	TDLEKDIISDTSGDFRK	558.619	3824.85	559.217	25494.5	112034
P07355	ANXA2	Annexin A2 OS=Homo sapiens GN=ANXA2 PE=1 SV=2	2	889.436	1	GLGTDEDSLIEIICSR	9097.65	17701.1	25569.2	18152.4	4478.7
P07355	ANXA2	Annexin A2 OS=Homo sapiens GN=ANXA2 PE=1 SV=2	2	889.44	1	GLGTDEDSLIEIICSR	340.704	1221.13	26947	1640.11	578.76
P07355	ANXA2	Annexin A2 OS=Homo sapiens GN=ANXA2 PE=1 SV=2	3	514.956	1	GVDEVTIVNILTNR	30.3103	14.3153	4531.89	8.26184	0.00406591
P07355	ANXA2	Annexin A2 OS=Homo sapiens GN=ANXA2 PE=1 SV=2	3	514.956	1	GVDEVTIVNILTNR	5959.41	33.7273	320.476	128.36	2204.2
P07355	ANXA2	Annexin A2 OS=Homo sapiens GN=ANXA2 PE=1 SV=2	3	689.002	1	RAEDGSVIDYELIDQDAR	2343.51	386.177	34019	1978.74	6952.95
P08195	4F2	4F2 cell-surface antigen heavy chain OS=Homo sapiens GN=SLC3A2 PE=1 SV=3	2	623.303	1	VAEDEAEAAAAAK	28800.1	22673.2	47871.3	31448	51493.7
P08195	4F2	4F2 cell-surface antigen heavy chain OS=Homo sapiens GN=SLC3A2 PE=1 SV=3	2	623.303	1	VAEDEAEAAAAAK	475.762	650.924	4055.48	53.7273	2.63324
P08195	4F2	4F2 cell-surface antigen heavy chain OS=Homo sapiens GN=SLC3A2 PE=1 SV=3	3	623	1	IGDLQAFQGHGAGNLAGLK	2295.54	366.051	1092.26	487.514	83981.5
P08195	4F2	4F2 cell-surface antigen heavy chain OS=Homo sapiens GN=SLC3A2 PE=1 SV=3	3	623	1	IGDLQAFQGHGAGNLAGLK	1902.33	30398.6	367.082	3813.18	4743.23
P08195	4F2	4F2 cell-surface antigen heavy chain OS=Homo sapiens GN=SLC3A2 PE=1 SV=3	3	770.739	1	ADLLLSTQPGREEGSPLELER	1233.49	17357.8	212479	4923.61	8423.65
P08195	4F2	4F2 cell-surface antigen heavy chain OS=Homo sapiens GN=SLC3A2 PE=1 SV=3	3	770.738	1	ADLLLSTQPGREEGSPLELER	217.689	2986.46	13527	160130	3597.2
P08195	4F2	4F2 cell-surface antigen heavy chain OS=Homo sapiens GN=SLC3A2 PE=1 SV=3	3	770.738	1	ADLLLSTQPGREEGSPLELER	76.2731	194.206	9.51732	60338.2	2309.49
P08195	4F2	4F2 cell-surface antigen heavy chain OS=Homo sapiens GN=SLC3A2 PE=1 SV=3	3	770.739	1	ADLLLSTQPGREEGSPLELER	4316.12	1013.22	76703.3	8896.36	227920
P08195	4F2	4F2 cell-surface antigen heavy chain OS=Homo sapiens GN=SLC3A2 PE=1 SV=3	3	770.739	1	ADLLLSTQPGREEGSPLELER	3555.37	57469.7	1401.46	259.585	204.397
P08195	4F2	4F2 cell-surface antigen heavy chain OS=Homo sapiens GN=SLC3A2 PE=1 SV=3	3	496.264	1	IKVAEDEAEAAAAAK	12437.4	12973.6	452.918	426.77	152.177
P08195	4F2	4F2 cell-surface antigen heavy chain OS=Homo sapiens GN=SLC3A2 PE=1 SV=3	2	743.893	1	IKVAEDEAEAAAAAK	11125.8	13697.9	7.92107	1045.23	90.728
P08195	4F2	4F2 cell-surface antigen heavy chain OS=Homo sapiens GN=SLC3A2 PE=1 SV=3	3	496.264	1	IKVAEDEAEAAAAAK	688.327	1324.74	2436.91	541.537	46736.5
P08195	4F2	4F2 cell-surface antigen heavy chain OS=Homo sapiens GN=SLC3A2 PE=1 SV=3	3	496.264	1	IKVAEDEAEAAAAAK	1287.66	502.785	6140.21	33474.4	1636.33
P08195	4F2	4F2 cell-surface antigen heavy chain OS=Homo sapiens GN=SLC3A2 PE=1 SV=3	2	686.424	1	LLTSFLPAQLLR	294.75	34550.8	134.439	1.7394	208.373
P08195	4F2	4F2 cell-surface antigen heavy chain OS=Homo sapiens GN=SLC3A2 PE=1 SV=3	2	686.424	1	LLTSFLPAQLLR	60272.8	28.7651	190.267	19.2768	179.075
P08195	4F2	4F2 cell-surface antigen heavy chain OS=Homo sapiens GN=SLC3A2 PE=1 SV=3	2	753.386	1	GQSEDPGSLLSLFR	3749.67	33096.1	4146.06	17107.7	15627.6
P08195	4F2	4F2 cell-surface antigen heavy chain OS=Homo sapiens GN=SLC3A2 PE=1 SV=3	2	753.386	1	GQSEDPGSLLSLFR	36745	13230.1	3578.24	543.807	4590.28
P08195	4F2	4F2 cell-surface antigen heavy chain OS=Homo sapiens GN=SLC3A2 PE=1 SV=3	2	469.765	1	LDYLSSLK	10267.6	10048	125.316	43.3222	141.955
P08195	4F2	4F2 cell-surface antigen heavy chain OS=Homo sapiens GN=SLC3A2 PE=1 SV=3	2	469.764	1	LDYLSSLK	344.232	124.056	496.664	14259.2	0
P08195	4F2	4F2 cell-surface antigen heavy chain OS=Homo sapiens GN=SLC3A2 PE=1 SV=3	4	895.694	1	NQKDDVAQTDLLQIDPNFGSKEDFDSLLQSAK	357.53	200.834	877.683	51368.7	69.5184
P08195	4F2	4F2 cell-surface antigen heavy chain OS=Homo sapiens GN=SLC3A2 PE=1 SV=3	3	1070.53	1	DDVAQTDLLQIDPNFGSKEDFDSLLQSAK	14300.4	136.194	0	0	218.335
Q12864	CAD17	Cadherin-17 OS=Homo sapiens GN=CDH17 PE=2 SV=3	2	509.775	1	VSEDVAIGTK	17193.8	16764.4	33047.5	31120.2	38309.1
Q12864	CAD17	Cadherin-17 OS=Homo sapiens GN=CDH17 PE=2 SV=3	3	876.098	1	FPFSIDQEGDIYVTQPLDREEK	9826.28	37329.3	45803.9	97544.3	352145
Q12864	CAD17	Cadherin-17 OS=Homo sapiens GN=CDH17 PE=2 SV=3	3	962.134	1	VKDINDNPPTCPSPVTVFEVQENER	3434.41	3388.08	224633	3292.61	2663.31
Q12864	CAD17	Cadherin-17 OS=Homo sapiens GN=CDH17 PE=2 SV=3	3	962.134	1	VKDINDNPPTCPSPVTVFEVQENER	3363.71	2089.81	9391.09	20710.5	274651
Q12864	CAD17	Cadherin-17 OS=Homo sapiens GN=CDH17 PE=2 SV=3	3	962.134	1	VKDINDNPPTCPSPVTVFEVQENER	2275.54	2334.69	40253.5	193430	2960.72
Q12864	CAD17	Cadherin-17 OS=Homo sapiens GN=CDH17 PE=2 SV=3	3	962.134	1	VKDINDNPPTCPSPVTVFEVQENER	129434	7302.77	10658.4	16116	10381.3
Q12864	CAD17	Cadherin-17 OS=Homo sapiens GN=CDH17 PE=2 SV=3	3	614.993	1	LGVDTDPHTNTGYVIIK	7578.4	13619.6	6521.14	76711.8	15913.1
Q12864	CAD17	Cadherin-17 OS=Homo sapiens GN=CDH17 PE=2 SV=3	3	614.993	1	LGVDTDPHTNTGYVIIK	755.197	19643.1	12760.5	833.589	501.831
Q12864	CAD17	Cadherin-17 OS=Homo sapiens GN=CDH17 PE=2 SV=3	3	630.003	1	DEYGKPLSYPLEIHVK	107.043	144.26	38991.7	2763.04	1968.15
Q12864	CAD17	Cadherin-17 OS=Homo sapiens GN=CDH17 PE=2 SV=3	3	630.001	1	DEYGKPLSYPLEIHVK	1479.47	7453.55	119.078	1757.86	57.2955
Q12864	CAD17	Cadherin-17 OS=Homo sapiens GN=CDH17 PE=2 SV=3	2	617.348	1	NPSYNLVISVK	7512.81	2540.45	67250.9	4102.99	7103.19
Q12864	CAD17	Cadherin-17 OS=Homo sapiens GN=CDH17 PE=2 SV=3	2	617.347	1	NPSYNLVISVK	972.097	1469.29	1064.91	35032.3	997.734
Q12864	CAD17	Cadherin-17 OS=Homo sapiens GN=CDH17 PE=2 SV=3	2	650.351	1	AENPEPLVFGVK	6557.67	19217.8	4662.95	7132.59	3615.96
Q12864	CAD17	Cadherin-17 OS=Homo sapiens GN=CDH17 PE=2 SV=3	3	593.663	1	KPLDFETAAVSNIVFK	400.098	307.281	894.715	22413.7	3451.02
Q12864	CAD17	Cadherin-17 OS=Homo sapiens GN=CDH17 PE=2 SV=3	3	593.662	1	KPLDFETAAVSNIVFK	3246.82	11057.1	6266.78	4692.27	5233.88
Q12864	CAD17	Cadherin-17 OS=Homo sapiens GN=CDH17 PE=2 SV=3	2	573.797	1	DAYVFYAVAK	305.874	766.999	10230.5	1196.17	25527.4
Q12864	CAD17	Cadherin-17 OS=Homo sapiens GN=CDH17 PE=2 SV=3	2	573.796	1	DAYVFYAVAK	9077.26	264.761	1812.22	512.133	121.284
Q12864	CAD17	Cadherin-17 OS=Homo sapiens GN=CDH17 PE=2 SV=3	2	573.797	1	DAYVFYAVAK	2573.98	979.908	26735.4	4712.81	19103.8
Q12864	CAD17	Cadherin-17 OS=Homo sapiens GN=CDH17 PE=2 SV=3	3	1012.52	1	FSGPLKPMTFSIYEGQEPSQIIFQFK	574.977	145.283	2093.49	27367.9	1507.23
Q12864	CAD17	Cadherin-17 OS=Homo sapiens GN=CDH17 PE=2 SV=3	3	1012.52	1	FSGPLKPMTFSIYEGQEPSQIIFQFK	11608.1	3216.61	0	251.127	356.546
Q12864	CAD17	Cadherin-17 OS=Homo sapiens GN=CDH17 PE=2 SV=3	3	752.4	1	LPMDGLFLIQTYAGMLQLAK	923.536	3922.73	1904.4	536.84	1294.05
P08174	DAF	Complement decay-accelerating factor OS=Homo sapiens GN=CD55 PE=1 SV=4	2	564.264	1	WSTAVEFCK	12498.1	8628.78	2060.08	248.993	157.83
P08174	DAF	Complement decay-accelerating factor OS=Homo sapiens GN=CD55 PE=1 SV=4	2	700.851	1	TSFPEDTVITYK	9751.19	11360.7	242389	42964.4	15855.5
P08174	DAF	Complement decay-accelerating factor OS=Homo sapiens GN=CD55 PE=1 SV=4	3	724.027	1	EIYCPAPPQIDNGIIQGER	2288.07	5328.45	109832	8593.5	3153.63
P08174	DAF	Complement decay-accelerating factor OS=Homo sapiens GN=CD55 PE=1 SV=4	3	724.027	1	EIYCPAPPQIDNGIIQGER	4134.68	4890.45	3347.7	51313.5	794.832
P08174	DAF	Complement decay-accelerating factor OS=Homo sapiens GN=CD55 PE=1 SV=4	2	1085.54	1	EIYCPAPPQIDNGIIQGER	544.891	577.18	80.0773	421.045	75958
P08174	DAF	Complement decay-accelerating factor OS=Homo sapiens GN=CD55 PE=1 SV=4	2	1085.54	1	EIYCPAPPQIDNGIIQGER	272.17	1267.99	83350.3	0	2493.29
P08174	DAF	Complement decay-accelerating factor OS=Homo sapiens GN=CD55 PE=1 SV=4	2	1085.54	1	EIYCPAPPQIDNGIIQGER	23249.8	63.3852	106.065	2.54117	0.00040129
P08174	DAF	Complement decay-accelerating factor OS=Homo sapiens GN=CD55 PE=1 SV=4	2	1085.54	1	EIYCPAPPQIDNGIIQGER	0	457.852	257.878	33603.7	15.2219
P08174	DAF	Complement decay-accelerating factor OS=Homo sapiens GN=CD55 PE=1 SV=4	3	1119.14	1	GFTMIGEHSIYCTVNNDEGEWSGPPPECR	694.774	544.995	761.98	84525.1	4306.8
P08174	DAF	Complement decay-accelerating factor OS=Homo sapiens GN=CD55 PE=1 SV=4	3	1119.14	1	GFTMIGEHSIYCTVNNDEGEWSGPPPECR	1165.86	535.415	72773.9	5.03671	63.2742
P08174	DAF	Complement decay-accelerating factor OS=Homo sapiens GN=CD55 PE=1 SV=4	3	1119.14	1	GFTMIGEHSIYCTVNNDEGEWSGPPPECR	100.092	34747.3	305.862	0	797.683
P04843	RPN1	Dolichyl-diphosphooligosaccharide--protein glycosyltransferase subunit 1 OS=Homo sapiens GN=RPN1 PE=1 SV=1	2	718.358	1	NIEIDSPYEISR	890.263	41831.8	12253.5	304.25	451.622
P04843	RPN1	Dolichyl-diphosphooligosaccharide--protein glycosyltransferase subunit 1 OS=Homo sapiens GN=RPN1 PE=1 SV=1	2	718.371	1	NIEIDSPYEISR	17922.8	19586.3	19541.4	57228.7	61937.7
P04843	RPN1	Dolichyl-diphosphooligosaccharide--protein glycosyltransferase subunit 1 OS=Homo sapiens GN=RPN1 PE=1 SV=1	2	716.814	1	GEDEEENNLEVR	3550.72	25755.2	5317.26	4153.16	4607.67
P04843	RPN1	Dolichyl-diphosphooligosaccharide--protein glycosyltransferase subunit 1 OS=Homo sapiens GN=RPN1 PE=1 SV=1	2	651.375	1	ALTSEIALLQSR	5127.08	23232.5	4030.95	3082.13	12975.2
P04843	RPN1	Dolichyl-diphosphooligosaccharide--protein glycosyltransferase subunit 1 OS=Homo sapiens GN=RPN1 PE=1 SV=1	2	830.454	1	ATSFLLALEPELEAR	1553.98	42820.8	19682.3	581.22	1002.74
P04843	RPN1	Dolichyl-diphosphooligosaccharide--protein glycosyltransferase subunit 1 OS=Homo sapiens GN=RPN1 PE=1 SV=1	3	551.97	1	VTAEVVLAHLGGGSTSR	1843.9	20069.9	326.93	3925.72	864.023
P16422	EPCAM	Epithelial cell adhesion molecule OS=Homo sapiens GN=EPCAM PE=1 SV=2	3	537.587	1	RTDKDTEITCSER	20614	20199.6	23976.2	41427.5	16002.7
P16422	EPCAM	Epithelial cell adhesion molecule OS=Homo sapiens GN=EPCAM PE=1 SV=2	3	454.877	1	AEIKEMGEMHR	1655.46	2173.31	3734.44	4633.38	1541.34
P16422	EPCAM	Epithelial cell adhesion molecule OS=Homo sapiens GN=EPCAM PE=1 SV=2	3	485.554	1	TDKDTEITCSER	4774.58	3155.91	7594.51	6245.11	6843.74
P16422	EPCAM	Epithelial cell adhesion molecule OS=Homo sapiens GN=EPCAM PE=1 SV=2	2	945.945	1	TQNDVDIADVAYYFEK	1173.62	1330.7	89483.8	4933.71	2251.21
P16422	EPCAM	Epithelial cell adhesion molecule OS=Homo sapiens GN=EPCAM PE=1 SV=2	2	945.944	1	TQNDVDIADVAYYFEK	4759.08	1778.89	382.719	66340.5	662.767
P16422	EPCAM	Epithelial cell adhesion molecule OS=Homo sapiens GN=EPCAM PE=1 SV=2	2	945.944	1	TQNDVDIADVAYYFEK	910.559	280.159	1073.4	4216.8	99290.3
P16422	EPCAM	Epithelial cell adhesion molecule OS=Homo sapiens GN=EPCAM PE=1 SV=2	2	945.944	1	TQNDVDIADVAYYFEK	6526.71	33412.1	961.37	1117.78	3726.72
P16422	EPCAM	Epithelial cell adhesion molecule OS=Homo sapiens GN=EPCAM PE=1 SV=2	2	945.943	1	TQNDVDIADVAYYFEK	25310.3	1585.67	1238.83	1327.53	2087.98
P16422	EPCAM	Epithelial cell adhesion molecule OS=Homo sapiens GN=EPCAM PE=1 SV=2	3	630.966	1	TQNDVDIADVAYYFEK	727.828	69.7068	685.086	9405.87	961.975
P16422	EPCAM	Epithelial cell adhesion molecule OS=Homo sapiens GN=EPCAM PE=1 SV=2	3	647.627	1	QCQCTSVGAQNTVICSK	22608.7	13452.4	59.4068	6058.62	126.205
P16422	EPCAM	Epithelial cell adhesion molecule OS=Homo sapiens GN=EPCAM PE=1 SV=2	3	918.419	1	AKPEGALQNNDGLYDPDCDESGLFK	1240.43	465.724	74275.7	546.716	1131.95
P16422	EPCAM	Epithelial cell adhesion molecule OS=Homo sapiens GN=EPCAM PE=1 SV=2	3	918.42	1	AKPEGALQNNDGLYDPDCDESGLFK	4220.24	405.849	2088.6	2850.77	69589.2
P16422	EPCAM	Epithelial cell adhesion molecule OS=Homo sapiens GN=EPCAM PE=1 SV=2	4	728.092	1	RAKPEGALQNNDGLYDPDCDESGLFK	1037.69	14568.4	364.94	690.857	928.54
P16422	EPCAM	Epithelial cell adhesion molecule OS=Homo sapiens GN=EPCAM PE=1 SV=2	3	1005.17	1	KMDLTVNGEQLDLDPGQTLIYYVDEK	24443.7	5030.92	512.141	267.078	1900.16
P16422	EPCAM	Epithelial cell adhesion molecule OS=Homo sapiens GN=EPCAM PE=1 SV=2	3	1005.17	1	KMDLTVNGEQLDLDPGQTLIYYVDEK	649.374	67.7094	25254.1	1299.47	977.215
Q06481	APLP2	Amyloid-like protein 2 OS=Homo sapiens GN=APLP2 PE=1 SV=2	3	499.887	1	MQNHGYENPTYK	5288.41	5962.41	8810.26	8262.77	5179.63
Q06481	APLP2	Amyloid-like protein 2 OS=Homo sapiens GN=APLP2 PE=1 SV=2	2	616.794	1	EWEEAELQAK	15635	12554.1	225.649	12963.1	7668.15
Q06481	APLP2	Amyloid-like protein 2 OS=Homo sapiens GN=APLP2 PE=1 SV=2	2	741.812	1	AVCSQEAMTGPCR	6583.76	6565.68	16135	10602.8	15240.1
Q06481	APLP2	Amyloid-like protein 2 OS=Homo sapiens GN=APLP2 PE=1 SV=2	2	902.481	1	CLVGEFVSDVLLVPEK	56466.3	757.283	1809.82	3633.34	430.515
Q06481	APLP2	Amyloid-like protein 2 OS=Homo sapiens GN=APLP2 PE=1 SV=2	2	902.482	1	CLVGEFVSDVLLVPEK	8777.12	23726.4	6520.45	7472.73	485.949
Q06481	APLP2	Amyloid-like protein 2 OS=Homo sapiens GN=APLP2 PE=1 SV=2	2	999.464	1	ADMDQFTASISETPVDVR	33090.9	1669.8	10244.5	10971	1741.36
P30533	AMRP	Alpha-2-macroglobulin receptor-associated protein OS=Homo sapiens GN=LRPAP1 PE=1 SV=1	3	622.615	1	VSHQGYSTEAEFEEPR	19852.2	21191	27.8694	0	232.064
P30533	AMRP	Alpha-2-macroglobulin receptor-associated protein OS=Homo sapiens GN=LRPAP1 PE=1 SV=1	3	622.617	1	VSHQGYSTEAEFEEPR	118.118	78.7764	433.359	237.164	38782
P30533	AMRP	Alpha-2-macroglobulin receptor-associated protein OS=Homo sapiens GN=LRPAP1 PE=1 SV=1	3	622.617	1	VSHQGYSTEAEFEEPR	486.544	523.675	42661.7	50935.9	1243.72
P30533	AMRP	Alpha-2-macroglobulin receptor-associated protein OS=Homo sapiens GN=LRPAP1 PE=1 SV=1	3	797.056	1	QVTSNSLSGTQEDGLDDPRLEK	74.9282	15058.3	101.575	0	0
P30533	AMRP	Alpha-2-macroglobulin receptor-associated protein OS=Homo sapiens GN=LRPAP1 PE=1 SV=1	3	563.288	1	LKLDGLDEDGEKEAR	6669.05	8542.56	269.424	8031.91	78.9031
P30533	AMRP	Alpha-2-macroglobulin receptor-associated protein OS=Homo sapiens GN=LRPAP1 PE=1 SV=1	3	524.953	1	VHEYNVLLETLSR	22.0814	43.1213	52.1316	9127.3	3592.22
Q14315	FLNC	Filamin-C OS=Homo sapiens GN=FLNC PE=1 SV=3	2	594.824	1	GPGLSQAFVGQK	7805.62	11377.8	118.565	2332.15	795.496
Q14315	FLNC	Filamin-C OS=Homo sapiens GN=FLNC PE=1 SV=3	2	801.414	1	SPFEVQVSPEAGVQK	0	10950.9	536.98	3.26561	5.00813
Q14315	FLNC	Filamin-C OS=Homo sapiens GN=FLNC PE=1 SV=3	2	792.917	1	GAGTGGLGLAIEGPSEAK	202.487	13550.6	12.1141	292.058	0
Q14315	FLNC	Filamin-C OS=Homo sapiens GN=FLNC PE=1 SV=3	2	730.397	1	GGLVGTPAPFSIDTK	5063.73	9121.93	295.657	885.542	2334.31
Q14315	FLNC	Filamin-C OS=Homo sapiens GN=FLNC PE=1 SV=3	2	791.948	1	SPFVVNVAPPLDLSK	1616.66	12446.2	2263.66	886.635	3949.8
Q07157	ZO1	Tight junction protein ZO-1 OS=Homo sapiens GN=TJP1 PE=1 SV=3	2	685.818	1	GGPAEGQLQENDR	7977.39	18452	11760.6	13530.3	13868.5
Q07157	ZO1	Tight junction protein ZO-1 OS=Homo sapiens GN=TJP1 PE=1 SV=3	2	1050.55	1	LAGGNDVGIFVAGVLEDSPAAK	710.378	5276.55	8562.76	8557.9	11.7554
Q07157	ZO1	Tight junction protein ZO-1 OS=Homo sapiens GN=TJP1 PE=1 SV=3	3	700.707	1	LAGGNDVGIFVAGVLEDSPAAK	160.742	3.78889	76.3203	4352.9	1.13466
Q07157	ZO1	Tight junction protein ZO-1 OS=Homo sapiens GN=TJP1 PE=1 SV=3	3	677.048	1	EAGFLRPVTIFGPIADVAR	3175.3	7800.06	1224.17	582.765	788.784
P62937	PPIA	Peptidyl-prolyl cis-trans isomerase A OS=Homo sapiens GN=PPIA PE=1 SV=2	2	624.32	1	KITIADCGQLE	134318	125327	1544.48	1072.05	1905.42
P62937	PPIA	Peptidyl-prolyl cis-trans isomerase A OS=Homo sapiens GN=PPIA PE=1 SV=2	2	624.32	1	KITIADCGQLE	8467.3	9457.11	26323.9	7693.15	479527
P62937	PPIA	Peptidyl-prolyl cis-trans isomerase A OS=Homo sapiens GN=PPIA PE=1 SV=2	3	513.251	1	VKEGMNIVEAMER	14844.8	83107.7	45048.7	58886.4	6498.19
P62937	PPIA	Peptidyl-prolyl cis-trans isomerase A OS=Homo sapiens GN=PPIA PE=1 SV=2	2	769.372	1	VKEGMNIVEAMER	5462.56	38858.1	20272	24200.1	4764.01
P62937	PPIA	Peptidyl-prolyl cis-trans isomerase A OS=Homo sapiens GN=PPIA PE=1 SV=2	3	936.449	1	HTGPGILSMANAGPNTNGSQFFICTAK	1485.21	1215.16	499334	2519.91	1721.69
P62937	PPIA	Peptidyl-prolyl cis-trans isomerase A OS=Homo sapiens GN=PPIA PE=1 SV=2	3	936.449	1	HTGPGILSMANAGPNTNGSQFFICTAK	6641.76	520378	3854.44	2833.11	12763.4
P62937	PPIA	Peptidyl-prolyl cis-trans isomerase A OS=Homo sapiens GN=PPIA PE=1 SV=2	3	936.448	1	HTGPGILSMANAGPNTNGSQFFICTAK	2224.95	3300.75	759.083	6332.23	593802
P62937	PPIA	Peptidyl-prolyl cis-trans isomerase A OS=Homo sapiens GN=PPIA PE=1 SV=2	3	936.449	1	HTGPGILSMANAGPNTNGSQFFICTAK	12752.1	3144.04	12035.1	439415	4077.28
P62937	PPIA	Peptidyl-prolyl cis-trans isomerase A OS=Homo sapiens GN=PPIA PE=1 SV=2	3	936.449	1	HTGPGILSMANAGPNTNGSQFFICTAK	450611	3077.24	6063.99	18790.4	779.148
P62937	PPIA	Peptidyl-prolyl cis-trans isomerase A OS=Homo sapiens GN=PPIA PE=1 SV=2	3	460.591	1	VSFELFADKVPK	6472	88010	3673.03	19466.2	9021.51
P62937	PPIA	Peptidyl-prolyl cis-trans isomerase A OS=Homo sapiens GN=PPIA PE=1 SV=2	3	460.592	1	VSFELFADKVPK	113269	16.0155	286.548	2587.84	550.969
P62937	PPIA	Peptidyl-prolyl cis-trans isomerase A OS=Homo sapiens GN=PPIA PE=1 SV=2	3	460.592	1	VSFELFADKVPK	51.3724	14.0379	80154.7	28.6751	0
P62937	PPIA	Peptidyl-prolyl cis-trans isomerase A OS=Homo sapiens GN=PPIA PE=1 SV=2	3	460.591	1	VSFELFADKVPK	135.978	74.3672	11086.1	118022	24201
P62937	PPIA	Peptidyl-prolyl cis-trans isomerase A OS=Homo sapiens GN=PPIA PE=1 SV=2	2	690.383	1	VSFELFADKVPK	10906.1	50300.7	9354.3	22342	20111.2
P62937	PPIA	Peptidyl-prolyl cis-trans isomerase A OS=Homo sapiens GN=PPIA PE=1 SV=2	2	690.381	1	VSFELFADKVPK	767.88	1377.01	6641.47	80697.6	40502.7
P62937	PPIA	Peptidyl-prolyl cis-trans isomerase A OS=Homo sapiens GN=PPIA PE=1 SV=2	2	577.792	1	FEDENFILK	9008.88	14.5676	1359.01	1022.79	87731.5
P62937	PPIA	Peptidyl-prolyl cis-trans isomerase A OS=Homo sapiens GN=PPIA PE=1 SV=2	3	502.588	1	VKEGMNIVEAMER	0	0	0	282.088	69971.4
P62937	PPIA	Peptidyl-prolyl cis-trans isomerase A OS=Homo sapiens GN=PPIA PE=1 SV=2	3	502.587	1	VKEGMNIVEAMER	69818.2	50.6687	1711	3764.7	3782.56
P62937	PPIA	Peptidyl-prolyl cis-trans isomerase A OS=Homo sapiens GN=PPIA PE=1 SV=2	2	528.275	1	VSFELFADK	617.983	20678.5	159.432	750.533	982.779
P62937	PPIA	Peptidyl-prolyl cis-trans isomerase A OS=Homo sapiens GN=PPIA PE=1 SV=2	3	649.341	1	VNPTVFFDIAVDGEPLGR	1261.6	49048.4	30371.3	2161.31	23716.7
P62937	PPIA	Peptidyl-prolyl cis-trans isomerase A OS=Homo sapiens GN=PPIA PE=1 SV=2	3	649.34	1	VNPTVFFDIAVDGEPLGR	79597.9	334.574	42378.7	1928.92	31331.9
P62937	PPIA	Peptidyl-prolyl cis-trans isomerase A OS=Homo sapiens GN=PPIA PE=1 SV=2	2	973.507	1	VNPTVFFDIAVDGEPLGR	132347	1978.29	12471.6	2400.18	12917.7
P62937	PPIA	Peptidyl-prolyl cis-trans isomerase A OS=Homo sapiens GN=PPIA PE=1 SV=2	2	973.508	1	VNPTVFFDIAVDGEPLGR	2006.12	75721.9	7541.71	10111.8	2886.98
P62937	PPIA	Peptidyl-prolyl cis-trans isomerase A OS=Homo sapiens GN=PPIA PE=1 SV=2	2	973.507	1	VNPTVFFDIAVDGEPLGR	1535.03	350.991	2582.51	142303	2347.29
P62937	PPIA	Peptidyl-prolyl cis-trans isomerase A OS=Homo sapiens GN=PPIA PE=1 SV=2	2	560.272	1	ITIADCGQLE	25037.1	17898.2	2370.06	9688.86	4833.52
P62937	PPIA	Peptidyl-prolyl cis-trans isomerase A OS=Homo sapiens GN=PPIA PE=1 SV=2	3	931.118	1	HTGPGILSMANAGPNTNGSQFFICTAK	236936	1545.12	2760.3	1547.82	1719.91
P62937	PPIA	Peptidyl-prolyl cis-trans isomerase A OS=Homo sapiens GN=PPIA PE=1 SV=2	3	931.118	1	HTGPGILSMANAGPNTNGSQFFICTAK	1095.3	421.95	6282.47	14593.1	205761
P62937	PPIA	Peptidyl-prolyl cis-trans isomerase A OS=Homo sapiens GN=PPIA PE=1 SV=2	3	931.118	1	HTGPGILSMANAGPNTNGSQFFICTAK	1746.58	334.102	38492.4	1595.28	500.964
P62937	PPIA	Peptidyl-prolyl cis-trans isomerase A OS=Homo sapiens GN=PPIA PE=1 SV=2	3	931.118	1	HTGPGILSMANAGPNTNGSQFFICTAK	2293.54	3446.21	1721.16	71677.1	1663.32
P62937	PPIA	Peptidyl-prolyl cis-trans isomerase A OS=Homo sapiens GN=PPIA PE=1 SV=2	2	639.796	1	EGMNIVEAMER	71.6596	88.5281	249.301	1261.46	86440.3
P27797	CALR	Calreticulin OS=Homo sapiens GN=CALR PE=1 SV=1	3	696.329	1	FYGDEEKDKGLQTSQDAR	17302.9	22465.8	510.602	787.521	760.539
P27797	CALR	Calreticulin OS=Homo sapiens GN=CALR PE=1 SV=1	2	705.82	1	EQFLDGDGWTSR	213.078	996.626	1739.25	6821.1	54323.5
P27797	CALR	Calreticulin OS=Homo sapiens GN=CALR PE=1 SV=1	3	840.406	1	IDNSQVESGSLEDDWDFLPPKK	28130.3	92117.9	20900	47358	7971.37
P27797	CALR	Calreticulin OS=Homo sapiens GN=CALR PE=1 SV=1	3	840.406	1	IDNSQVESGSLEDDWDFLPPKK	1585.16	1135.58	12834.1	5995.63	164962
P27797	CALR	Calreticulin OS=Homo sapiens GN=CALR PE=1 SV=1	3	840.407	1	IDNSQVESGSLEDDWDFLPPKK	72235.9	825.337	2567.62	7653.26	4731.04
P27797	CALR	Calreticulin OS=Homo sapiens GN=CALR PE=1 SV=1	2	804.401	1	FYALSASFEPFSNK	1080.44	1581.69	59286.1	10529.8	23161.3
P27797	CALR	Calreticulin OS=Homo sapiens GN=CALR PE=1 SV=1	2	804.396	1	FYALSASFEPFSNK	48777.9	3706.27	3699.17	4893.85	6335.09
P27797	CALR	Calreticulin OS=Homo sapiens GN=CALR PE=1 SV=1	2	804.395	1	FYALSASFEPFSNK	15247.4	794.583	4949.7	36831.2	4003.54
P27797	CALR	Calreticulin OS=Homo sapiens GN=CALR PE=1 SV=1	2	610.358	1	GQTLVVQFTVK	596.938	512.871	2010.39	446.278	27426.5
P27797	CALR	Calreticulin OS=Homo sapiens GN=CALR PE=1 SV=1	3	1163.51	1	LFPNSLDQTDMHGDSEYNIMFGPDICGPGTK	10868.1	67047.4	1130.98	350.142	1356.15
P14314	GLU2B	Glucosidase 2 subunit beta OS=Homo sapiens GN=PRKCSH PE=1 SV=2	2	654.318	1	ESLQQMAEVTR	17574	23520.9	26319.2	33484.3	335.687
P14314	GLU2B	Glucosidase 2 subunit beta OS=Homo sapiens GN=PRKCSH PE=1 SV=2	2	669.815	1	ETMVTSTTEPSR	16212.7	4820.8	8946.01	4731.12	20512.2
P14314	GLU2B	Glucosidase 2 subunit beta OS=Homo sapiens GN=PRKCSH PE=1 SV=2	2	579.813	1	LWEEQLAAAK	2936.28	1148.76	28082.9	2982.77	84463.4
P14314	GLU2B	Glucosidase 2 subunit beta OS=Homo sapiens GN=PRKCSH PE=1 SV=2	2	579.812	1	LWEEQLAAAK	1625.3	1417.98	65079	3407.4	59988.5
P14314	GLU2B	Glucosidase 2 subunit beta OS=Homo sapiens GN=PRKCSH PE=1 SV=2	2	677.813	1	ETMVTSTTEPSR	7723.15	11513.4	25024.4	13037.3	14920
P14314	GLU2B	Glucosidase 2 subunit beta OS=Homo sapiens GN=PRKCSH PE=1 SV=2	2	618.304	1	SLEDQVEMLR	77.2342	15806.8	975.324	188.934	4198.89
P14314	GLU2B	Glucosidase 2 subunit beta OS=Homo sapiens GN=PRKCSH PE=1 SV=2	2	618.304	1	SLEDQVEMLR	8584.94	3402.02	11501.1	50551.8	1692.03
P14314	GLU2B	Glucosidase 2 subunit beta OS=Homo sapiens GN=PRKCSH PE=1 SV=2	2	776.834	1	YEQGTGCWQGPNR	19640.8	13066	452.105	14971.7	972.799
P14314	GLU2B	Glucosidase 2 subunit beta OS=Homo sapiens GN=PRKCSH PE=1 SV=2	3	1014.39	1	VNDGVCDCCDGTDEYNSGVICENTCK	104.861	24419.3	0	1.1902	63.6168
P14314	GLU2B	Glucosidase 2 subunit beta OS=Homo sapiens GN=PRKCSH PE=1 SV=2	3	1014.38	1	VNDGVCDCCDGTDEYNSGVICENTCK	50040.3	0.00380642	97.5401	61.2668	78.8746
P14314	GLU2B	Glucosidase 2 subunit beta OS=Homo sapiens GN=PRKCSH PE=1 SV=2	3	1014.39	1	VNDGVCDCCDGTDEYNSGVICENTCK	9.29562	84.3863	52064.1	165.755	482.412
P14314	GLU2B	Glucosidase 2 subunit beta OS=Homo sapiens GN=PRKCSH PE=1 SV=2	3	1014.38	1	VNDGVCDCCDGTDEYNSGVICENTCK	0	24.2279	73.2666	8.26422	62795.8
P27487	DPP4	Dipeptidyl peptidase 4 OS=Homo sapiens GN=DPP4 PE=1 SV=2	2	515.28	1	CGIAVAPVSR	12831.9	9859.28	11747.2	7403.62	3008.44
P27487	DPP4	Dipeptidyl peptidase 4 OS=Homo sapiens GN=DPP4 PE=1 SV=2	3	648.99	1	CSGPGLPLYTLHSSVNDK	26940.6	2112.84	5792.66	4238.4	3751.22
P27487	DPP4	Dipeptidyl peptidase 4 OS=Homo sapiens GN=DPP4 PE=1 SV=2	2	739.344	1	VTCLSCELNPER	2749.67	703.276	21982.1	1496.89	694.561
P27487	DPP4	Dipeptidyl peptidase 4 OS=Homo sapiens GN=DPP4 PE=1 SV=2	3	615.966	1	HSYTASYDIYDLNKR	407.994	8836.56	29.6629	335.74	691.821
P27487	DPP4	Dipeptidyl peptidase 4 OS=Homo sapiens GN=DPP4 PE=1 SV=2	2	789.397	1	LGTFEVEDQIEAAR	439.519	1028.16	681.984	361.7	41645.2
P27487	DPP4	Dipeptidyl peptidase 4 OS=Homo sapiens GN=DPP4 PE=1 SV=2	2	789.398	1	LGTFEVEDQIEAAR	6984.15	10915.8	49664.5	11512.6	22596.3
P05556	ITB1	Integrin beta-1 OS=Homo sapiens GN=ITGB1 PE=1 SV=2	3	673.727	1	LKPEDITQIQPQQLVLR	258.772	1974.99	90532.4	1955.62	413.536
P05556	ITB1	Integrin beta-1 OS=Homo sapiens GN=ITGB1 PE=1 SV=2	3	673.727	1	LKPEDITQIQPQQLVLR	673.554	317.584	2366.41	941.32	97355.3
P05556	ITB1	Integrin beta-1 OS=Homo sapiens GN=ITGB1 PE=1 SV=2	3	673.725	1	LKPEDITQIQPQQLVLR	468.859	32365.1	5742.96	24296.4	8109.37
P05556	ITB1	Integrin beta-1 OS=Homo sapiens GN=ITGB1 PE=1 SV=2	3	673.727	1	LKPEDITQIQPQQLVLR	35567.5	1331.52	1281.02	2750.87	96.1818
Q07065	CKAP4	Cytoskeleton-associated protein 4 OS=Homo sapiens GN=CKAP4 PE=1 SV=2	2	681.332	1	IETNENNLESAK	15670.3	8842.11	25366.4	17265.7	27326
Q07065	CKAP4	Cytoskeleton-associated protein 4 OS=Homo sapiens GN=CKAP4 PE=1 SV=2	3	674.685	1	VQEQVHTLLSQDQAQAAR	1135.99	12915.7	71	82.4298	45.4262
Q07065	CKAP4	Cytoskeleton-associated protein 4 OS=Homo sapiens GN=CKAP4 PE=1 SV=2	3	674.683	1	VQEQVHTLLSQDQAQAAR	1188.86	11550	38074.2	5606.12	4446.9
Q07065	CKAP4	Cytoskeleton-associated protein 4 OS=Homo sapiens GN=CKAP4 PE=1 SV=2	2	626.843	1	TAVDSLVAYSVK	390.413	652.038	973.131	8196	38369.8
P21912	SDHB	Succinate dehydrogenase [ubiquinone] iron-sulfur subunit, mitochondrial OS=Homo sapiens GN=SDHB PE=1 SV=3	2	699.367	1	YLGPAVLMQAYR	43972.7	13260.1	33607.5	3354.79	15390.3
P21912	SDHB	Succinate dehydrogenase [ubiquinone] iron-sulfur subunit, mitochondrial OS=Homo sapiens GN=SDHB PE=1 SV=3	2	836.918	1	DLVPDLSNFYAQYK	32549.6	1761	7017.61	3419.61	1583.73
P21912	SDHB	Succinate dehydrogenase [ubiquinone] iron-sulfur subunit, mitochondrial OS=Homo sapiens GN=SDHB PE=1 SV=3	2	836.918	1	DLVPDLSNFYAQYK	837.785	17353.4	1408.37	3938	3214.44
Q9Y624	JAM1	Junctional adhesion molecule A OS=Homo sapiens GN=F11R PE=1 SV=1	2	692.319	1	NGYGTPMTSNAVR	7786.75	12414.1	23962.4	16832	20714.2
Q9Y624	JAM1	Junctional adhesion molecule A OS=Homo sapiens GN=F11R PE=1 SV=1	2	666.307	1	LSCAYSGFSSPR	14121.1	10303.3	0	0.388375	1.02944
Q9Y624	JAM1	Junctional adhesion molecule A OS=Homo sapiens GN=F11R PE=1 SV=1	2	666.306	1	LSCAYSGFSSPR	21796.5	3507.33	45560.5	7729.64	2756.88
Q9Y624	JAM1	Junctional adhesion molecule A OS=Homo sapiens GN=F11R PE=1 SV=1	2	666.308	1	LSCAYSGFSSPR	4491.11	1241.85	2784.88	1394.03	47169.5
Q9Y624	JAM1	Junctional adhesion molecule A OS=Homo sapiens GN=F11R PE=1 SV=1	3	791.803	1	LIVLVPPSKPTVNIPSSATIGNR	352.243	104.98	118978	3708.53	740.046
Q9Y624	JAM1	Junctional adhesion molecule A OS=Homo sapiens GN=F11R PE=1 SV=1	3	791.803	1	LIVLVPPSKPTVNIPSSATIGNR	635.523	2937.88	298.433	96644.2	51.2458
Q9Y624	JAM1	Junctional adhesion molecule A OS=Homo sapiens GN=F11R PE=1 SV=1	3	791.803	1	LIVLVPPSKPTVNIPSSATIGNR	418.212	30.9104	157.331	235.787	113174
Q9Y624	JAM1	Junctional adhesion molecule A OS=Homo sapiens GN=F11R PE=1 SV=1	3	791.803	1	LIVLVPPSKPTVNIPSSATIGNR	44478	755.045	177.045	1151.7	16.5487
Q9Y624	JAM1	Junctional adhesion molecule A OS=Homo sapiens GN=F11R PE=1 SV=1	2	612.357	1	VTFLPTGITFK	65.5622	32.8949	234.457	1455.89	22594.8
Q9Y624	JAM1	Junctional adhesion molecule A OS=Homo sapiens GN=F11R PE=1 SV=1	3	720.387	1	ITASYEDRVTFLPTGITFK	377.447	154.318	0	17199.4	992.027
O95994	AGR2	Anterior gradient protein 2 homolog OS=Homo sapiens GN=AGR2 PE=1 SV=1	3	695.694	1	LYAYEPADTALLLDNMKK	978.362	884.129	507362	27114.8	19945.6
O95994	AGR2	Anterior gradient protein 2 homolog OS=Homo sapiens GN=AGR2 PE=1 SV=1	2	647.344	1	IMFVDPSLTVR	23201	45407.1	79028.4	17316.3	86014.8
O95994	AGR2	Anterior gradient protein 2 homolog OS=Homo sapiens GN=AGR2 PE=1 SV=1	3	690.359	1	LYAYEPADTALLLDNMKK	152583	6289.1	9010.72	20312.1	78310.9
O95994	AGR2	Anterior gradient protein 2 homolog OS=Homo sapiens GN=AGR2 PE=1 SV=1	2	1101.03	1	GWGDQLIWTQTYEEALYK	1313.05	14956.1	276.945	175.182	0
O95994	AGR2	Anterior gradient protein 2 homolog OS=Homo sapiens GN=AGR2 PE=1 SV=1	2	647.349	1	IMFVDPSLTVR	129405	3519.27	1359.42	9884.37	2502.18
O95994	AGR2	Anterior gradient protein 2 homolog OS=Homo sapiens GN=AGR2 PE=1 SV=1	2	639.358	1	IMFVDPSLTVR	981.878	794.105	381461	3965.63	14440.1
O95994	AGR2	Anterior gradient protein 2 homolog OS=Homo sapiens GN=AGR2 PE=1 SV=1	2	639.357	1	IMFVDPSLTVR	738.683	588.987	41929.2	121522	526948
O95994	AGR2	Anterior gradient protein 2 homolog OS=Homo sapiens GN=AGR2 PE=1 SV=1	2	639.352	1	IMFVDPSLTVR	173480	1713	1698.84	1379.79	2760.05
O95994	AGR2	Anterior gradient protein 2 homolog OS=Homo sapiens GN=AGR2 PE=1 SV=1	2	639.351	1	IMFVDPSLTVR	8345.56	12432.3	18098	90397.2	5152.66
Q96AG4	LRC59	Leucine-rich repeat-containing protein 59 OS=Homo sapiens GN=LRRC59 PE=1 SV=1	2	503.73	1	VAGDCLDEK	5168.34	4901.83	9614.67	6805.58	11997.7
P46977	STT3A	Dolichyl-diphosphooligosaccharide--protein glycosyltransferase subunit STT3A OS=Homo sapiens GN=STT3A PE=1 SV=2	2	521.765	1	FGQVYTEAK	3903.16	13488.1	4697.21	4584.58	4503.78
P46977	STT3A	Dolichyl-diphosphooligosaccharide--protein glycosyltransferase subunit STT3A OS=Homo sapiens GN=STT3A PE=1 SV=2	2	746.325	1	ENDYYTPTGEFR	2584.41	11317.6	58.4735	447.935	159.102
P16615	AT2A2	Sarcoplasmic\endoplasmic reticulum calcium ATPase 2 OS=Homo sapiens GN=ATP2A2 PE=1 SV=1	2	653.309	1	EFDELNPSAQR	8414.34	25890.3	395.297	2282.91	618.262
P16615	AT2A2	Sarcoplasmic\endoplasmic reticulum calcium ATPase 2 OS=Homo sapiens GN=ATP2A2 PE=1 SV=1	4	598.339	1	AKDIVPGDIVEIAVGDKVPADIR	422.173	18988.6	939.082	327.204	295.853
P16615	AT2A2	Sarcoplasmic\endoplasmic reticulum calcium ATPase 2 OS=Homo sapiens GN=ATP2A2 PE=1 SV=1	3	814.392	1	TASEMVLADDNFSTIVAAVEEGR	5544.08	11921.6	12957.7	9052.19	6991.75
P16615	AT2A2	Sarcoplasmic\endoplasmic reticulum calcium ATPase 2 OS=Homo sapiens GN=ATP2A2 PE=1 SV=1	3	933.129	1	IVEFLQSFDEITAMTGDGVNDAPALK	2207.94	22282.5	7919.15	29924.6	6694.47
P10599	THIO	Thioredoxin OS=Homo sapiens GN=TXN PE=1 SV=3	2	668.825	1	TAFQEALDAAGDK	2177.56	656.822	28712.7	14064.9	67112.3
P10599	THIO	Thioredoxin OS=Homo sapiens GN=TXN PE=1 SV=3	2	668.825	1	TAFQEALDAAGDK	3989.68	14647.8	1243.25	860.519	1703.81
P10599	THIO	Thioredoxin OS=Homo sapiens GN=TXN PE=1 SV=3	2	668.825	1	TAFQEALDAAGDK	579.47	1172.2	44576.3	919.904	3346.01
P53621	COPA	Coatomer subunit alpha OS=Homo sapiens GN=COPA PE=1 SV=2	2	914.955	1	ASNLENSTYDLYTIPK	1052.93	13656.4	410.286	378.715	945.237
P53621	COPA	Coatomer subunit alpha OS=Homo sapiens GN=COPA PE=1 SV=2	3	820.792	1	LLQPPAPIMPLDTNWPLLTVSK	797.911	6892.15	262.63	1934.18	927.284
O94907	DKK1	Dickkopf-related protein 1 OS=Homo sapiens GN=DKK1 PE=1 SV=1	2	503.244	1	GQEGSVCLR	24259.6	15383	36902.1	30390.3	38957.3
O94907	DKK1	Dickkopf-related protein 1 OS=Homo sapiens GN=DKK1 PE=1 SV=1	2	672.261	1	SSDCASGLCCAR	37890	19905.6	68958.3	46435.1	82552.4
O94907	DKK1	Dickkopf-related protein 1 OS=Homo sapiens GN=DKK1 PE=1 SV=1	2	631.243	1	CYCGEGLSCR	18798.1	10515.5	27792.2	17826.2	22922.2
O94907	DKK1	Dickkopf-related protein 1 OS=Homo sapiens GN=DKK1 PE=1 SV=1	3	471.845	1	HAMCCPGNYCK	824.545	779.445	1915.12	1711.47	1209.34
O94907	DKK1	Dickkopf-related protein 1 OS=Homo sapiens GN=DKK1 PE=1 SV=1	2	707.264	1	HAMCCPGNYCK	1361.38	1845.98	3967.48	2959.15	2179.35
O94907	DKK1	Dickkopf-related protein 1 OS=Homo sapiens GN=DKK1 PE=1 SV=1	2	688.826	1	GGDAGVQICLACR	2552.93	335.42	598.721	1217.97	46553
O94907	DKK1	Dickkopf-related protein 1 OS=Homo sapiens GN=DKK1 PE=1 SV=1	2	688.826	1	GGDAGVQICLACR	17808.1	22922	339.033	390.05	1987.14
P07602	SAP	Prosaposin OS=Homo sapiens GN=PSAP PE=1 SV=2	2	574.78	1	GSAVWCQNVK	15651.6	11302.7	19871.5	14610.1	10131.5
P07602	SAP	Prosaposin OS=Homo sapiens GN=PSAP PE=1 SV=2	3	363.866	1	HLAELNHQK	2674.72	1943.91	724.341	2196.54	402.176
P67809	YBOX1	Nuclease-sensitive element-binding protein 1 OS=Homo sapiens GN=YBX1 PE=1 SV=3	4	810.639	1	RPQYSNPPVQGEVMEGADNQGAGEQGRPVR	59.7992	38961.2	96.9899	341.05	40.712
P67809	YBOX1	Nuclease-sensitive element-binding protein 1 OS=Homo sapiens GN=YBX1 PE=1 SV=3	4	810.638	1	RPQYSNPPVQGEVMEGADNQGAGEQGRPVR	5516.51	2124.46	88182	13054	15952.4
P67809	YBOX1	Nuclease-sensitive element-binding protein 1 OS=Homo sapiens GN=YBX1 PE=1 SV=3	2	848.438	1	GAEAANVTGPGGVPVQGSK	27647.8	12371.6	1364.72	2554.59	3983.84
P67809	YBOX1	Nuclease-sensitive element-binding protein 1 OS=Homo sapiens GN=YBX1 PE=1 SV=3	2	949.408	1	AADPPAENSSAPEAEQGGAE	12255.8	5450.04	27662	20546.3	23084.7
P67809	YBOX1	Nuclease-sensitive element-binding protein 1 OS=Homo sapiens GN=YBX1 PE=1 SV=3	2	898.42	1	SVGDGETVEFDVVEGEK	2432.98	2197.03	69740.9	5722.91	187.002
Q14697	GANAB	Neutral alpha-glucosidase AB OS=Homo sapiens GN=GANAB PE=1 SV=3	3	555.355	1	VVIIGAGKPAAVVLQTK	2772.39	15730.8	171.52	1389.46	2196.93
Q14697	GANAB	Neutral alpha-glucosidase AB OS=Homo sapiens GN=GANAB PE=1 SV=3	3	719.002	1	VSQGSKDPAEGDGAQPEETPR	9057.12	1528.94	1084.26	84.9074	0
Q8TDB8	GTR14	Solute carrier family 2, facilitated glucose transporter member 14 OS=Homo sapiens GN=SLC2A14 PE=2 SV=1	2	579.769	1	AFEGQAHGADR	37267.5	43341.4	41357.7	42791	27499.3
Q8TDB8	GTR14	Solute carrier family 2, facilitated glucose transporter member 14 OS=Homo sapiens GN=SLC2A14 PE=2 SV=1	2	552.825	1	QVTVLELFR	182.195	23.9893	19896.5	140330	5232.9
Q8TDB8	GTR14	Solute carrier family 2, facilitated glucose transporter member 14 OS=Homo sapiens GN=SLC2A14 PE=2 SV=1	2	552.826	1	QVTVLELFR	1874.58	45435.9	43.1421	1159.23	417.389
Q8TDB8	GTR14	Solute carrier family 2, facilitated glucose transporter member 14 OS=Homo sapiens GN=SLC2A14 PE=2 SV=1	2	552.825	1	QVTVLELFR	51.3717	19.4292	134898	0	25827.9
Q8TDB8	GTR14	Solute carrier family 2, facilitated glucose transporter member 14 OS=Homo sapiens GN=SLC2A14 PE=2 SV=1	3	784.7	1	LWGTQDVSQDIQEMKDESAR	7834.7	1688	28570.3	553908	16337
Q8TDB8	GTR14	Solute carrier family 2, facilitated glucose transporter member 14 OS=Homo sapiens GN=SLC2A14 PE=2 SV=1	3	784.699	1	LWGTQDVSQDIQEMKDESAR	7748.23	9709.78	555558	34133.1	56334.8
Q8TDB8	GTR14	Solute carrier family 2, facilitated glucose transporter member 14 OS=Homo sapiens GN=SLC2A14 PE=2 SV=1	3	784.7	1	LWGTQDVSQDIQEMKDESAR	20970.3	49390.8	213.272	0	2046.74
Q8TDB8	GTR14	Solute carrier family 2, facilitated glucose transporter member 14 OS=Homo sapiens GN=SLC2A14 PE=2 SV=1	2	441.223	1	TFEDITR	887.168	129.583	1636.79	360.128	183076
Q8TDB8	GTR14	Solute carrier family 2, facilitated glucose transporter member 14 OS=Homo sapiens GN=SLC2A14 PE=2 SV=1	3	779.37	1	LWGTQDVSQDIQEMKDESAR	156886	3227.87	2257.4	9225.76	6187.42
Q13162	PRDX4	Peroxiredoxin-4 OS=Homo sapiens GN=PRDX4 PE=1 SV=1	2	606.818	1	LVQAFQYTDK	13731.4	8933.08	322.924	1472.98	524.999
O00592	PODXL	Podocalyxin OS=Homo sapiens GN=PODXL PE=1 SV=2	2	642.881	1	LASVPGSQTVVVK	49630.5	37608.1	230.538	144.069	339.434
O00592	PODXL	Podocalyxin OS=Homo sapiens GN=PODXL PE=1 SV=2	2	734.319	1	CEDLETQTQSEK	20186.1	13978.3	42495.6	25435.5	44165.1
O00592	PODXL	Podocalyxin OS=Homo sapiens GN=PODXL PE=1 SV=2	2	734.305	1	CEDLETQTQSEK	1402.68	7877.04	0	0	5397.1
O00592	PODXL	Podocalyxin OS=Homo sapiens GN=PODXL PE=1 SV=2	2	706.819	1	LGDQGPPEEAEDR	8882.75	8910.5	16734.4	11528.5	15516.3
O43852	CALU	Calumenin OS=Homo sapiens GN=CALU PE=1 SV=2	3	527.259	1	TFDQLTPEESKER	42307.6	30283.5	1379.11	20672.6	1143.68
O43852	CALU	Calumenin OS=Homo sapiens GN=CALU PE=1 SV=2	3	511.584	1	HLVYESDQNKDGK	18823.4	15021.5	7290.75	17827.8	4821.03
Q92544	TM9S4	Transmembrane 9 superfamily member 4 OS=Homo sapiens GN=TM9SF4 PE=1 SV=2	3	735.053	1	ITEDYYVHLIADNLPVATR	2076.14	32422	2842.12	309.846	377.48
Q9NZM1	MYOF	Myoferlin OS=Homo sapiens GN=MYOF PE=1 SV=1	2	642.85	1	GPVGTVSEAQLAR	4252.78	17123.2	1448.27	445.761	386.286
Q9NZM1	MYOF	Myoferlin OS=Homo sapiens GN=MYOF PE=1 SV=1	2	615.347	1	ANVTVLDTQIR	2618.63	7972.78	79.1062	54.1666	119.036
Q9NZM1	MYOF	Myoferlin OS=Homo sapiens GN=MYOF PE=1 SV=1	3	571.322	1	KLEPISNDDLLVVEK	1690.53	3609.71	2601.61	507.17	3009.78
Q9NZM1	MYOF	Myoferlin OS=Homo sapiens GN=MYOF PE=1 SV=1	2	810.866	1	LEGALGADTTEDGDEK	1211.78	7195.13	0	443.794	0
P17931	LEG3	Galectin-3 OS=Homo sapiens GN=LGALS3 PE=1 SV=5	3	442.248	1	IQVLVEPDHFK	308.568	131.987	57439.1	679.542	9184.84
P17931	LEG3	Galectin-3 OS=Homo sapiens GN=LGALS3 PE=1 SV=5	3	442.248	1	IQVLVEPDHFK	359.211	81.0277	2524.02	429.84	55385.9
P17931	LEG3	Galectin-3 OS=Homo sapiens GN=LGALS3 PE=1 SV=5	3	442.248	1	IQVLVEPDHFK	53.9743	12926.2	9.56168	134.719	17.9985
P17931	LEG3	Galectin-3 OS=Homo sapiens GN=LGALS3 PE=1 SV=5	3	442.248	1	IQVLVEPDHFK	62.2699	16.7729	4140.92	34534	5848.46
P17931	LEG3	Galectin-3 OS=Homo sapiens GN=LGALS3 PE=1 SV=5	2	662.868	1	IQVLVEPDHFK	453.466	222.197	29583.3	170.802	1190.95
O14745	NHRF1	Na(+)\H(+) exchange regulatory cofactor NHE-RF1 OS=Homo sapiens GN=SLC9A3R1 PE=1 SV=4	2	700.838	1	SVDPDSPAEASGLR	21646.4	15089.1	44.2812	7310.35	41.0998
O14745	NHRF1	Na(+)\H(+) exchange regulatory cofactor NHE-RF1 OS=Homo sapiens GN=SLC9A3R1 PE=1 SV=4	2	813.935	1	LLVVDPETDEQLQK	229.482	23358	19.3241	155.851	43.1248
O14745	NHRF1	Na(+)\H(+) exchange regulatory cofactor NHE-RF1 OS=Homo sapiens GN=SLC9A3R1 PE=1 SV=4	2	813.935	1	LLVVDPETDEQLQK	5057.75	857.909	10822.6	1048.44	103080
O14745	NHRF1	Na(+)\H(+) exchange regulatory cofactor NHE-RF1 OS=Homo sapiens GN=SLC9A3R1 PE=1 SV=4	2	813.934	1	LLVVDPETDEQLQK	4756.89	14250.4	87816.9	3366.62	22128.4
O14745	NHRF1	Na(+)\H(+) exchange regulatory cofactor NHE-RF1 OS=Homo sapiens GN=SLC9A3R1 PE=1 SV=4	2	813.935	1	LLVVDPETDEQLQK	3388.23	264.3	229.397	51777.4	44.9573
O14745	NHRF1	Na(+)\H(+) exchange regulatory cofactor NHE-RF1 OS=Homo sapiens GN=SLC9A3R1 PE=1 SV=4	2	675.824	1	IVEVNGVCMEGK	2458.93	4528	7377.1	5362.21	2299.79
O14745	NHRF1	Na(+)\H(+) exchange regulatory cofactor NHE-RF1 OS=Homo sapiens GN=SLC9A3R1 PE=1 SV=4	3	863.401	1	AQEAPGQAEPPAAAEVQGAGNENEPR	2275.3	1344.17	34.2008	25049	0
P23284	PPIB	Peptidyl-prolyl cis-trans isomerase B OS=Homo sapiens GN=PPIB PE=1 SV=2	2	682.856	1	TVDNFVALATGEK	6759.07	21142.8	8688.08	1265.04	724.879
P23284	PPIB	Peptidyl-prolyl cis-trans isomerase B OS=Homo sapiens GN=PPIB PE=1 SV=2	2	682.858	1	TVDNFVALATGEK	615.854	395.934	32262.4	2159.58	68687.5
P23284	PPIB	Peptidyl-prolyl cis-trans isomerase B OS=Homo sapiens GN=PPIB PE=1 SV=2	2	682.858	1	TVDNFVALATGEK	33020.5	3042.45	10126.6	3609.64	3376.89
P23284	PPIB	Peptidyl-prolyl cis-trans isomerase B OS=Homo sapiens GN=PPIB PE=1 SV=2	2	729.368	1	DTNGSQFFITTVK	16241.1	1954.04	1261.34	1782.21	1813.31
P11279	LAMP1	Lysosome-associated membrane glycoprotein 1 OS=Homo sapiens GN=LAMP1 PE=1 SV=3	2	576.306	1	ALQATVGNSYK	52643.9	45114.1	116686	102210	121689
P11279	LAMP1	Lysosome-associated membrane glycoprotein 1 OS=Homo sapiens GN=LAMP1 PE=1 SV=3	2	576.307	1	ALQATVGNSYK	1485.28	4946.16	1927.65	1997.62	34911.1
P11279	LAMP1	Lysosome-associated membrane glycoprotein 1 OS=Homo sapiens GN=LAMP1 PE=1 SV=3	2	576.307	1	ALQATVGNSYK	6686.67	5287.5	49607.4	770.92	2492.02
P11279	LAMP1	Lysosome-associated membrane glycoprotein 1 OS=Homo sapiens GN=LAMP1 PE=1 SV=3	2	517.281	1	TVESITDIR	5599.65	5218.54	12849.2	3726.43	188209
P11279	LAMP1	Lysosome-associated membrane glycoprotein 1 OS=Homo sapiens GN=LAMP1 PE=1 SV=3	2	507.726	1	CNAEEHVR	415.373	600.108	1690.13	905.465	1222.06
Q00325	MPCP	Phosphate carrier protein, mitochondrial OS=Homo sapiens GN=SLC25A3 PE=1 SV=2	2	681.364	1	IQTQPGYANTLR	32152	170658	46.0381	14499.5	78.5385
Q00325	MPCP	Phosphate carrier protein, mitochondrial OS=Homo sapiens GN=SLC25A3 PE=1 SV=2	2	681.352	1	IQTQPGYANTLR	11035.4	22993.6	19197.2	55313.5	120144
P12235	ADT1	ADP\ATP translocase 1 OS=Homo sapiens GN=SLC25A4 PE=1 SV=4	2	723.876	1	YFPTQALNFAFK	8339.61	54581.9	11474	4161.5	30373.5
P12235	ADT1	ADP\ATP translocase 1 OS=Homo sapiens GN=SLC25A4 PE=1 SV=4	2	723.877	1	YFPTQALNFAFK	200.913	639.51	11611.3	477.445	152.625
P11169	GTR3	Solute carrier family 2, facilitated glucose transporter member 3 OS=Homo sapiens GN=SLC2A3 PE=2 SV=1	3	790.7	1	SGKDGVMEMNSIEPAKETTTNV	57411	240608	44.2694	288.133	0
P11169	GTR3	Solute carrier family 2, facilitated glucose transporter member 3 OS=Homo sapiens GN=SLC2A3 PE=2 SV=1	3	790.694	1	SGKDGVMEMNSIEPAKETTTNV	14384	24507.9	532121	77457.6	60110.8
P11169	GTR3	Solute carrier family 2, facilitated glucose transporter member 3 OS=Homo sapiens GN=SLC2A3 PE=2 SV=1	3	790.7	1	SGKDGVMEMNSIEPAKETTTNV	10651.1	2513.01	10824.9	335094	16274.7
P11169	GTR3	Solute carrier family 2, facilitated glucose transporter member 3 OS=Homo sapiens GN=SLC2A3 PE=2 SV=1	3	790.699	1	SGKDGVMEMNSIEPAKETTTNV	2062.14	1482.65	17844.1	16585.2	279313
P11169	GTR3	Solute carrier family 2, facilitated glucose transporter member 3 OS=Homo sapiens GN=SLC2A3 PE=2 SV=1	2	726.822	1	DGVMEMNSIEPAK	5129.57	15892.4	33973	12478	14996.1
P11169	GTR3	Solute carrier family 2, facilitated glucose transporter member 3 OS=Homo sapiens GN=SLC2A3 PE=2 SV=1	2	1049.47	1	DGVMEMNSIEPAKETTTNV	107.893	1947.4	102008	73.1883	6.79507
P11169	GTR3	Solute carrier family 2, facilitated glucose transporter member 3 OS=Homo sapiens GN=SLC2A3 PE=2 SV=1	2	1049.47	1	DGVMEMNSIEPAKETTTNV	0	123.563	560.417	65511.6	63.8611
P11169	GTR3	Solute carrier family 2, facilitated glucose transporter member 3 OS=Homo sapiens GN=SLC2A3 PE=2 SV=1	2	517.291	1	SVEMLILGR	3241.82	286.215	64803.3	2381.3	57014.4
P11169	GTR3	Solute carrier family 2, facilitated glucose transporter member 3 OS=Homo sapiens GN=SLC2A3 PE=2 SV=1	3	785.365	1	SGKDGVMEMNSIEPAKETTTNV	18593.8	2256.78	29900.4	17985.7	383258
P11169	GTR3	Solute carrier family 2, facilitated glucose transporter member 3 OS=Homo sapiens GN=SLC2A3 PE=2 SV=1	3	785.368	1	SGKDGVMEMNSIEPAKETTTNV	4141.62	9072.42	245005	21636.7	12098.7
P11169	GTR3	Solute carrier family 2, facilitated glucose transporter member 3 OS=Homo sapiens GN=SLC2A3 PE=2 SV=1	2	1033.48	1	DGVMEMNSIEPAKETTTNV	45932.2	147.106	1048.22	5441.44	3790.48
P05026	AT1B1	Sodium\potassium-transporting ATPase subunit beta-1 OS=Homo sapiens GN=ATP1B1 PE=1 SV=1	2	745.376	1	YNPNVLPVQCTGK	12116.4	11226.8	4738.78	9.77748	10067.1
P05090	APOD	Apolipoprotein D OS=Homo sapiens GN=APOD PE=1 SV=1	2	829.405	1	CPNPPVQENFDVNK	35645.1	7786.71	2618.22	191502	58577.8
P05090	APOD	Apolipoprotein D OS=Homo sapiens GN=APOD PE=1 SV=1	2	654.801	1	MTVTDQVNCPK	2476.08	3407.07	32511.4	23667.1	17314.2
P05090	APOD	Apolipoprotein D OS=Homo sapiens GN=APOD PE=1 SV=1	2	712.376	1	NPNLPPETVDSLK	5270.82	1115.29	12507.1	1676.44	100021
P11166	GTR1	Solute carrier family 2, facilitated glucose transporter member 1 OS=Homo sapiens GN=SLC2A1 PE=1 SV=2	2	571.779	1	TFDEIASGFR	6384.01	48524.6	3918.64	1007.12	14056.2
P11166	GTR1	Solute carrier family 2, facilitated glucose transporter member 1 OS=Homo sapiens GN=SLC2A1 PE=1 SV=2	2	571.779	1	TFDEIASGFR	763.336	909.406	102816	1546.98	5772.4
P11166	GTR1	Solute carrier family 2, facilitated glucose transporter member 1 OS=Homo sapiens GN=SLC2A1 PE=1 SV=2	2	571.779	1	TFDEIASGFR	1280.38	305.088	2046.22	4165.44	127830
P11166	GTR1	Solute carrier family 2, facilitated glucose transporter member 1 OS=Homo sapiens GN=SLC2A1 PE=1 SV=2	2	571.778	1	TFDEIASGFR	17557.5	806.803	4329.43	80802.1	3552.17
P11166	GTR1	Solute carrier family 2, facilitated glucose transporter member 1 OS=Homo sapiens GN=SLC2A1 PE=1 SV=2	3	654.635	1	GTADVTHDLQEMKEESR	11579.4	51440.3	0	9771.25	0
P11166	GTR1	Solute carrier family 2, facilitated glucose transporter member 1 OS=Homo sapiens GN=SLC2A1 PE=1 SV=2	3	654.635	1	GTADVTHDLQEMKEESR	90.0338	130.175	8184.94	751.678	52898.4
P08574	CY1	Cytochrome c1, heme protein, mitochondrial OS=Homo sapiens GN=CYC1 PE=1 SV=3	2	835.949	1	AANNGALPPDLSYIVR	10635.3	2458.75	2341.07	5904.81	208920
P08574	CY1	Cytochrome c1, heme protein, mitochondrial OS=Homo sapiens GN=CYC1 PE=1 SV=3	3	638.986	1	LFDYFPKPYPNSEAAR	211.209	58.9779	13338.4	3674.96	129125
P08574	CY1	Cytochrome c1, heme protein, mitochondrial OS=Homo sapiens GN=CYC1 PE=1 SV=3	3	894.07	1	ELAAEVEVQDGPNEDGEMFMRPGK	4499	4438.41	77173.2	2824.71	2015.37
Q15758	AAAT	Neutral amino acid transporter B(0) OS=Homo sapiens GN=SLC1A5 PE=1 SV=2	2	572.318	1	STEPELIQVK	25402.6	21584.4	1982.99	22493.1	1527.31
Q15758	AAAT	Neutral amino acid transporter B(0) OS=Homo sapiens GN=SLC1A5 PE=1 SV=2	2	551.774	1	GPAGDATVASEK	5344.26	5682.6	10053.9	8321.03	12264.4
Q15758	AAAT	Neutral amino acid transporter B(0) OS=Homo sapiens GN=SLC1A5 PE=1 SV=2	2	1079.59	1	SELPLDPLPVPTEEGNPLLK	392.189	797.277	124.147	55981.8	387.421
Q15758	AAAT	Neutral amino acid transporter B(0) OS=Homo sapiens GN=SLC1A5 PE=1 SV=2	2	1079.59	1	SELPLDPLPVPTEEGNPLLK	428.517	30967.8	0	334.621	707.373
Q15758	AAAT	Neutral amino acid transporter B(0) OS=Homo sapiens GN=SLC1A5 PE=1 SV=2	2	1079.59	1	SELPLDPLPVPTEEGNPLLK	28628.8	144.605	0	39.3363	43.2257
Q15758	AAAT	Neutral amino acid transporter B(0) OS=Homo sapiens GN=SLC1A5 PE=1 SV=2	2	782.862	1	GPAGDATVASEKESVM	1473.05	2962.34	818.121	5517.19	171.995
P45880	VDAC2	Voltage-dependent anion-selective channel protein 2 OS=Homo sapiens GN=VDAC2 PE=1 SV=2	3	701.724	1	VNNSSLIGVGYTQTLRPGVK	507.406	929.293	76608.3	822.244	1099.99
O43278	SPIT1	Kunitz-type protease inhibitor 1 OS=Homo sapiens GN=SPINT1 PE=1 SV=2	2	664.794	1	QTEDYCLASNK	7437.91	3972.31	15174.1	9543.89	13784.7
P12830	CADH1	Cadherin-1 OS=Homo sapiens GN=CDH1 PE=1 SV=3	2	579.717	1	LADMYGGGEDD	0	712.551	3272.4	2141.87	1889.41
O15230	LAMA5	Laminin subunit alpha-5 OS=Homo sapiens GN=LAMA5 PE=1 SV=8	2	602.304	1	AVAAEAQDTATR	2835.97	6052.93	3888.12	3112.78	2894.98
O15230	LAMA5	Laminin subunit alpha-5 OS=Homo sapiens GN=LAMA5 PE=1 SV=8	2	702.335	1	IAASATCGEEAPAR	4350.59	8457.1	5395.39	4600.87	4429.62
O95573	ACSL3	Long-chain-fatty-acid--CoA ligase 3 OS=Homo sapiens GN=ACSL3 PE=1 SV=3	2	791.393	1	IGYSSPQTLADQSSK	7745.62	18896.8	58.8591	42.2953	0
O95573	ACSL3	Long-chain-fatty-acid--CoA ligase 3 OS=Homo sapiens GN=ACSL3 PE=1 SV=3	3	677.719	1	VLSEAAISASLEKFEIPVK	111.689	13391.8	685.062	61.6958	26.8643
P20674	COX5A	Cytochrome c oxidase subunit 5A, mitochondrial OS=Homo sapiens GN=COX5A PE=1 SV=2	2	846.932	1	GINTLVTYDMVPEPK	4199.23	3087.8	155936	70738.2	6682.61
P20674	COX5A	Cytochrome c oxidase subunit 5A, mitochondrial OS=Homo sapiens GN=COX5A PE=1 SV=2	2	846.932	1	GINTLVTYDMVPEPK	7274.89	2188.53	3764.65	71201	1207.15
P20674	COX5A	Cytochrome c oxidase subunit 5A, mitochondrial OS=Homo sapiens GN=COX5A PE=1 SV=2	2	846.932	1	GINTLVTYDMVPEPK	1049.88	1175.64	8550.28	4191.42	95265.4
P20674	COX5A	Cytochrome c oxidase subunit 5A, mitochondrial OS=Homo sapiens GN=COX5A PE=1 SV=2	2	846.932	1	GINTLVTYDMVPEPK	38752.5	7738.56	10023.5	5626.24	45.6649
Q9UBM7	DHCR7	7-dehydrocholesterol reductase OS=Homo sapiens GN=DHCR7 PE=1 SV=1	2	743.337	1	VIECSYTSADGQR	4636.71	13210.6	6091.48	6168.7	915.533
P05141	ADT2	ADP\ATP translocase 2 OS=Homo sapiens GN=SLC25A5 PE=1 SV=7	2	561.297	1	EQGVLSFWR	6602.66	17570.5	55127.4	26311.8	370257
P05141	ADT2	ADP\ATP translocase 2 OS=Homo sapiens GN=SLC25A5 PE=1 SV=7	2	610.339	1	DFLAGGVAAAISK	29257.2	39603.8	16166.2	23243.3	16817.9
P05141	ADT2	ADP\ATP translocase 2 OS=Homo sapiens GN=SLC25A5 PE=1 SV=7	2	610.338	1	DFLAGGVAAAISK	240.906	350.411	14505.7	2434.68	33139.5
P05141	ADT2	ADP\ATP translocase 2 OS=Homo sapiens GN=SLC25A5 PE=1 SV=7	2	610.339	1	DFLAGGVAAAISK	978.443	8006.23	3934.58	7662.68	795.848
P05141	ADT2	ADP\ATP translocase 2 OS=Homo sapiens GN=SLC25A5 PE=1 SV=7	2	610.34	1	DFLAGGVAAAISK	15181.2	474.574	5867.92	7391.31	2909.61
P05141	ADT2	ADP\ATP translocase 2 OS=Homo sapiens GN=SLC25A5 PE=1 SV=7	2	610.306	1	AAYFGIYDTAK	6147.47	11223.9	770.661	3586.13	1613.04
P81605	DCD	Dermcidin OS=Homo sapiens GN=DCD PE=1 SV=2	2	564.769	1	ENAGEDPGLAR	18016.2	5666.46	15000.7	11585.2	24951.7
P81605	DCD	Dermcidin OS=Homo sapiens GN=DCD PE=1 SV=2	2	581.287	1	DAVEDLESVGK	9022.93	2936.62	3.49152	425.7	199.566
P81605	DCD	Dermcidin OS=Homo sapiens GN=DCD PE=1 SV=2	2	581.287	1	DAVEDLESVGK	1539.62	1834.91	1288.87	13626	3302.96
O00299	CLIC1	Chloride intracellular channel protein 1 OS=Homo sapiens GN=CLIC1 PE=1 SV=4	2	664.827	1	NSNPALNDNLEK	13478.2	12292.8	22074.8	16515.2	24836.7
O00299	CLIC1	Chloride intracellular channel protein 1 OS=Homo sapiens GN=CLIC1 PE=1 SV=4	2	922.994	1	LAALNPESNTAGLDIFAK	477.715	627.604	53688.2	370.692	214.77
O00299	CLIC1	Chloride intracellular channel protein 1 OS=Homo sapiens GN=CLIC1 PE=1 SV=4	2	922.994	1	LAALNPESNTAGLDIFAK	417.323	1056.73	3840.46	1316.44	53552.5
O14983	AT2A1	Sarcoplasmic\endoplasmic reticulum calcium ATPase 1 OS=Homo sapiens GN=ATP2A1 PE=1 SV=1	2	670.339	1	NMLFSGTNIAAGK	10610.6	21145.4	577.174	33065.4	1874.83
Q12907	LMAN2	Vesicular integral-membrane protein VIP36 OS=Homo sapiens GN=LMAN2 PE=1 SV=1	2	625.277	1	DNVDDPTGNFR	15936.9	17333.1	15813.3	21168.3	3026.76
Q12907	LMAN2	Vesicular integral-membrane protein VIP36 OS=Homo sapiens GN=LMAN2 PE=1 SV=1	2	625.279	1	DNVDDPTGNFR	3314.91	7855.91	1654.68	472.225	39021.9
Q12907	LMAN2	Vesicular integral-membrane protein VIP36 OS=Homo sapiens GN=LMAN2 PE=1 SV=1	3	916.095	1	LPTGYYFGASAGTGDLSDNHDIISMK	3327.64	21449.1	1565.94	1261.9	649.04
Q12907	LMAN2	Vesicular integral-membrane protein VIP36 OS=Homo sapiens GN=LMAN2 PE=1 SV=1	3	916.096	1	LPTGYYFGASAGTGDLSDNHDIISMK	4560.26	5525.9	517.782	33373.6	4413.41
P10606	COX5B	Cytochrome c oxidase subunit 5B, mitochondrial OS=Homo sapiens GN=COX5B PE=1 SV=2	2	657.878	1	KGLDPYNVLAPK	2483.78	395.413	19428.2	10219.4	89818.1
P10606	COX5B	Cytochrome c oxidase subunit 5B, mitochondrial OS=Homo sapiens GN=COX5B PE=1 SV=2	2	593.829	1	GLDPYNVLAPK	1696.56	8.71508	6517.02	83.4659	39318
P10606	COX5B	Cytochrome c oxidase subunit 5B, mitochondrial OS=Homo sapiens GN=COX5B PE=1 SV=2	2	593.828	1	GLDPYNVLAPK	655.382	10206.4	3701.76	1126.95	5077.34
P10606	COX5B	Cytochrome c oxidase subunit 5B, mitochondrial OS=Homo sapiens GN=COX5B PE=1 SV=2	2	593.829	1	GLDPYNVLAPK	290.124	282.85	23273.3	591.215	2782.8
P07339	CATD	Cathepsin D OS=Homo sapiens GN=CTSD PE=1 SV=1	2	902.409	1	DPDAQPGGELMLGGTDSK	507.137	984.21	697.812	15467.1	1395.9
Q15293	RCN1	Reticulocalbin-1 OS=Homo sapiens GN=RCN1 PE=1 SV=1	2	609.309	1	AADLNGDLTATR	16790.5	10720.7	10273.7	12469.5	1500.93
Q15293	RCN1	Reticulocalbin-1 OS=Homo sapiens GN=RCN1 PE=1 SV=1	3	522.587	1	TFDQLTPDESKER	13199.5	10727.7	139.2	6515.08	204.162
Q15293	RCN1	Reticulocalbin-1 OS=Homo sapiens GN=RCN1 PE=1 SV=1	3	712.684	1	IVDRIDNDGDGFVTTEELK	1590.81	349.64	31502.3	1869.4	23600.3
P60953	CDC42	Cell division control protein 42 homolog OS=Homo sapiens GN=CDC42 PE=1 SV=2	2	599.793	1	YVECSALTQK	2041.88	2872.06	9355.04	8056.37	9600.54
P60953	CDC42	Cell division control protein 42 homolog OS=Homo sapiens GN=CDC42 PE=1 SV=2	3	786.758	1	TPFLLVGTQIDLRDDPSTIEK	13868.7	219.171	420.947	161.971	0
P60953	CDC42	Cell division control protein 42 homolog OS=Homo sapiens GN=CDC42 PE=1 SV=2	3	618.33	1	NVFDEAILAALEPPEPK	759.177	6228.82	72.9227	644.05	5769.79
Q5JTH9	RRP12	RRP12-like protein OS=Homo sapiens GN=RRP12 PE=1 SV=2	2	498.286	1	VLATQPGPGR	1376.72	5299.16	1996.02	1668.35	2657.61
Q5JTH9	RRP12	RRP12-like protein OS=Homo sapiens GN=RRP12 PE=1 SV=2	3	424.568	1	APAHHPAAISTAK	307.401	1732.35	374.652	433.542	664.705
Q5JTH9	RRP12	RRP12-like protein OS=Homo sapiens GN=RRP12 PE=1 SV=2	2	976.536	1	TYLTITDTQLVNSLLEK	601.915	7308.17	0	2884.84	1453.54
O60716	CTND1	Catenin delta-1 OS=Homo sapiens GN=CTNND1 PE=1 SV=1	3	792.367	1	YQEAAPNVANNTGPHAASCFGAK	0	18376.2	13.411	0	264.489
P12270	TPR	Nucleoprotein TPR OS=Homo sapiens GN=TPR PE=1 SV=3	2	700.351	1	NIEELQQQNQR	3173.65	4773.26	4878.64	2667.03	4054.32
P12270	TPR	Nucleoprotein TPR OS=Homo sapiens GN=TPR PE=1 SV=3	3	789.094	1	GIASTSDPPTANIKPTPVVSTPSK	834.245	19566.1	0	4.55935	6.90088
Q9UJS0	CMC2	Calcium-binding mitochondrial carrier protein Aralar2 OS=Homo sapiens GN=SLC25A13 PE=1 SV=2	3	664.012	1	ASGDSARPVLLQVAESAYR	3052.06	13505.6	13019.4	3578.45	5353.87
Q9UJS0	CMC2	Calcium-binding mitochondrial carrier protein Aralar2 OS=Homo sapiens GN=SLC25A13 PE=1 SV=2	2	1053.09	1	FGLGSVAGAVGATAVYPIDLVK	315.981	9268.1	141.763	702.297	481.422
P9WNK7	ESXA	6 kDa early secretory antigenic target OS=Mycobacterium tuberculosis (strain ATCC 25618 \ H37Rv) GN=esxA PE=1 SV=1	2	950.982	1	WDATATELNNALQNLAR	7225.74	3274.92	1.14265e+06	140951	5.50225e+07
P9WNK7	ESXA	6 kDa early secretory antigenic target OS=Mycobacterium tuberculosis (strain ATCC 25618 \ H37Rv) GN=esxA PE=1 SV=1	2	950.982	1	WDATATELNNALQNLAR	15017	5705.51	5.13406e+07	583760	1.30268e+06
P9WNK7	ESXA	6 kDa early secretory antigenic target OS=Mycobacterium tuberculosis (strain ATCC 25618 \ H37Rv) GN=esxA PE=1 SV=1	2	950.982	1	WDATATELNNALQNLAR	13197.2	14132.9	86553.1	4.64621e+07	67885.6
P9WNK7	ESXA	6 kDa early secretory antigenic target OS=Mycobacterium tuberculosis (strain ATCC 25618 \ H37Rv) GN=esxA PE=1 SV=1	3	634.324	1	WDATATELNNALQNLAR	6230.96	3709.28	40744.7	9.5123e+06	90943
P9WNK7	ESXA	6 kDa early secretory antigenic target OS=Mycobacterium tuberculosis (strain ATCC 25618 \ H37Rv) GN=esxA PE=1 SV=1	3	634.324	1	WDATATELNNALQNLAR	18989.9	1528.43	9.7003e+06	97090.2	302849
P9WNK7	ESXA	6 kDa early secretory antigenic target OS=Mycobacterium tuberculosis (strain ATCC 25618 \ H37Rv) GN=esxA PE=1 SV=1	3	634.324	1	WDATATELNNALQNLAR	2696.95	593.806	195072	21715.6	9.97084e+06
P9WNK7	ESXA	6 kDa early secretory antigenic target OS=Mycobacterium tuberculosis (strain ATCC 25618 \ H37Rv) GN=esxA PE=1 SV=1	2	954.468	1	LAAAWGGSGSEAYQGVQQK	69339.9	41376.2	2.28464e+07	3.59551e+06	256193
P9WNK7	ESXA	6 kDa early secretory antigenic target OS=Mycobacterium tuberculosis (strain ATCC 25618 \ H37Rv) GN=esxA PE=1 SV=1	3	636.648	1	LAAAWGGSGSEAYQGVQQK	38023	41136.8	1.26647e+07	2.36405e+06	703286
P9WNK7	ESXA	6 kDa early secretory antigenic target OS=Mycobacterium tuberculosis (strain ATCC 25618 \ H37Rv) GN=esxA PE=1 SV=1	3	636.648	1	LAAAWGGSGSEAYQGVQQK	12434.5	27582.8	27970.8	6.55026e+06	12459.7
P9WNK7	ESXA	6 kDa early secretory antigenic target OS=Mycobacterium tuberculosis (strain ATCC 25618 \ H37Rv) GN=esxA PE=1 SV=1	2	954.468	1	LAAAWGGSGSEAYQGVQQK	3756.15	8686.23	64102.9	1.10408e+07	1254.45
Q92504	S39A7	Zinc transporter SLC39A7 OS=Homo sapiens GN=SLC39A7 PE=1 SV=2	3	542.274	1	DGPVRPQNAEEEKR	316363	169148	136429	253173	76959.7
Q92504	S39A7	Zinc transporter SLC39A7 OS=Homo sapiens GN=SLC39A7 PE=1 SV=2	4	406.958	1	DGPVRPQNAEEEKR	109774	57882.7	42458.8	89594.5	29636.8
Q92504	S39A7	Zinc transporter SLC39A7 OS=Homo sapiens GN=SLC39A7 PE=1 SV=2	3	542.274	1	DGPVRPQNAEEEKR	758.786	186.635	7848.96	3223.96	344120
Q92504	S39A7	Zinc transporter SLC39A7 OS=Homo sapiens GN=SLC39A7 PE=1 SV=2	3	542.275	1	DGPVRPQNAEEEKR	11043.1	1403.13	198334	17264.5	30170.7
P05067	A4	Amyloid beta A4 protein OS=Homo sapiens GN=APP PE=1 SV=3	2	474.236	1	VEAMLNDR	10835.1	5704.89	9603.53	7057.41	16678.5
P05067	A4	Amyloid beta A4 protein OS=Homo sapiens GN=APP PE=1 SV=3	2	761.818	1	EVCSEQAETGPCR	6810.29	4165.1	11027.4	5985.55	12517.2
O43169	CYB5B	Cytochrome b5 type B OS=Homo sapiens GN=CYB5B PE=1 SV=2	4	907.671	1	FLNEHPGGEEVLLEQAGVDASESFEDVGHSSDAR	27385.7	302.521	562.962	7568.9	258.681
P15529	MCP	Membrane cofactor protein OS=Homo sapiens GN=CD46 PE=1 SV=3	2	456.255	1	VLCTPPPK	16419.3	10634.1	30158.4	22469.8	38690.4
O15260	SURF4	Surfeit locus protein 4 OS=Homo sapiens GN=SURF4 PE=1 SV=3	2	564.764	1	SMFAGVPTMR	14923.4	30529.5	17814.1	41671.8	1208.76
O15260	SURF4	Surfeit locus protein 4 OS=Homo sapiens GN=SURF4 PE=1 SV=3	2	1022.46	1	GQNDLMGTAEDFADQFLR	1147.44	8096.51	7221.63	6734.7	552.195
O15260	SURF4	Surfeit locus protein 4 OS=Homo sapiens GN=SURF4 PE=1 SV=3	2	1022.46	1	GQNDLMGTAEDFADQFLR	1089.92	12021.3	2895.1	8166.25	3093.76
P14174	MIF	Macrophage migration inhibitory factor OS=Homo sapiens GN=MIF PE=1 SV=4	2	652.346	1	PMFIVNTNVPR	1702.89	51376.4	3706.11	14543.5	2065.87
P14174	MIF	Macrophage migration inhibitory factor OS=Homo sapiens GN=MIF PE=1 SV=4	2	652.347	1	PMFIVNTNVPR	12003.7	5554.47	126323	7213.25	6827.12
P14174	MIF	Macrophage migration inhibitory factor OS=Homo sapiens GN=MIF PE=1 SV=4	2	652.347	1	PMFIVNTNVPR	32840	962.292	2083.09	13203.2	105234
P14174	MIF	Macrophage migration inhibitory factor OS=Homo sapiens GN=MIF PE=1 SV=4	2	644.348	1	PMFIVNTNVPR	8121	4961.97	1137.08	4546.77	133446
P14174	MIF	Macrophage migration inhibitory factor OS=Homo sapiens GN=MIF PE=1 SV=4	2	644.348	1	PMFIVNTNVPR	3914.78	11219.1	49850.1	1284.52	4391.74
P14174	MIF	Macrophage migration inhibitory factor OS=Homo sapiens GN=MIF PE=1 SV=4	2	644.35	1	PMFIVNTNVPR	57587.7	3854.7	4786.43	2188.57	3935.89
P14174	MIF	Macrophage migration inhibitory factor OS=Homo sapiens GN=MIF PE=1 SV=4	2	522.798	1	LLCGLLAER	1248.39	1153.02	7545.46	36942.5	14591.3
Q08554	DSC1	Desmocollin-1 OS=Homo sapiens GN=DSC1 PE=1 SV=2	3	561.945	1	VTATDLDEPDTLHTR	17508.5	8548.81	183.469	443.262	174.428
Q14108	SCRB2	Lysosome membrane protein 2 OS=Homo sapiens GN=SCARB2 PE=1 SV=2	2	606.8	1	VEEVGPYTYR	999.248	852.301	63061.6	9297.76	3561.79
Q14739	LBR	Lamin-B receptor OS=Homo sapiens GN=LBR PE=1 SV=2	2	1015.49	1	NDLSPASSGNAVYDFFIGR	1359.51	16602.4	5439.09	2741.17	19094.6
P62491	RB11A	Ras-related protein Rab-11A OS=Homo sapiens GN=RAB11A PE=1 SV=3	2	522.31	1	VVLIGDSGVGK	5771.6	5348.79	33.6946	20495.2	0.0824062
P08183	MDR1	Multidrug resistance protein 1 OS=Homo sapiens GN=ABCB1 PE=1 SV=3	2	582.308	1	IATEAIENFR	8067.4	7142.33	48.8006	61.4156	109.033
Q14118	DAG1	Dystroglycan OS=Homo sapiens GN=DAG1 PE=1 SV=2	2	648.816	1	ATSITVTGSGSCR	4246.72	2233.18	7136.74	5735.36	8012.99
P29966	MARCS	Myristoylated alanine-rich C-kinase substrate OS=Homo sapiens GN=MARCKS PE=1 SV=4	2	750.846	1	AEDGATPSPSNETPK	10905.9	5500.83	16744.7	10092.6	17191.2
P29966	MARCS	Myristoylated alanine-rich C-kinase substrate OS=Homo sapiens GN=MARCKS PE=1 SV=4	3	972.443	1	EAPAEGEAAEPGSPTAAEGEAASAASSTSSPK	204.889	2174.94	6357.4	4843.48	58470.6
P42167	LAP2B	Lamina-associated polypeptide 2, isoforms beta\gamma OS=Homo sapiens GN=TMPO PE=1 SV=2	2	687.863	1	PEFLEDPSVLTK	1221.26	1185.67	565.364	1824.13	26567.9
P49006	MRP	MARCKS-related protein OS=Homo sapiens GN=MARCKSL1 PE=1 SV=2	2	687.332	1	GDVTAEEAAGASPAK	3992.87	1730.28	6319.28	4303.01	7513.91
P49006	MRP	MARCKS-related protein OS=Homo sapiens GN=MARCKSL1 PE=1 SV=2	2	664.33	1	AAATPESQEPQAK	2391.81	1585.34	5391.21	3778.52	6016.68
P16435	NCPR	NADPH--cytochrome P450 reductase OS=Homo sapiens GN=POR PE=1 SV=2	3	825.443	1	ATTPVIMVGPGTGVAPFIGFIQER	778.179	10314.8	404.762	977.608	917.991
P06744	G6PI	Glucose-6-phosphate isomerase OS=Homo sapiens GN=GPI PE=1 SV=4	2	916.504	1	TLAQLNPESSLFIIASK	15426.2	11933.5	1348.25	40134.1	3856.88
O00116	ADAS	Alkyldihydroxyacetonephosphate synthase, peroxisomal OS=Homo sapiens GN=AGPS PE=1 SV=1	3	747.063	1	RAASAATAAPTATPAAQESGTIPK	2462.53	11967.5	0	58.5595	0.146517
Q16891	MIC60	MICOS complex subunit MIC60 OS=Homo sapiens GN=IMMT PE=1 SV=1	2	936.504	1	TSSAETPTIPLGSAVEAIK	145.235	16843.4	7.22e-05	98.992	6.0052
Q8TCJ2	STT3B	Dolichyl-diphosphooligosaccharide--protein glycosyltransferase subunit STT3B OS=Homo sapiens GN=STT3B PE=1 SV=1	2	579.768	1	FGEMQLDFR	78.7211	5171.37	1222.51	6367.03	2627.33
Q5ZPR3	CD276	CD276 antigen OS=Homo sapiens GN=CD276 PE=1 SV=1	3	908.794	1	DFGSAAVSLQVAAPYSKPSMTLEPNK	1456.96	3126.96	44494.7	1254.19	1786.75
P00403	COX2	Cytochrome c oxidase subunit 2 OS=Homo sapiens GN=MT-CO2 PE=1 SV=1	2	553.852	1	VVLPIEAPIR	5.16832	6354.54	7.6787	1.27943	9.17977
Q9UJU6	DBNL	Drebrin-like protein OS=Homo sapiens GN=DBNL PE=1 SV=1	2	704.344	1	AMSTTSISSPQPGK	3400.03	3470.73	8452.17	5896.98	4973.91
Q9UJU6	DBNL	Drebrin-like protein OS=Homo sapiens GN=DBNL PE=1 SV=1	3	479.572	1	NRNEQESAVHPR	1802.44	1246.16	786.757	1474.48	280.108
Q93084	AT2A3	Sarcoplasmic\endoplasmic reticulum calcium ATPase 3 OS=Homo sapiens GN=ATP2A3 PE=1 SV=2	2	742.847	1	TGTLTTNQMSVCR	441.568	5652.21	1937.65	1519.44	859.444
Q93084	AT2A3	Sarcoplasmic\endoplasmic reticulum calcium ATPase 3 OS=Homo sapiens GN=ATP2A3 PE=1 SV=2	2	810.908	1	VGEATETALTCLVEK	2307.49	10145	285.936	5275.84	360.975
Q9BY67	CADM1	Cell adhesion molecule 1 OS=Homo sapiens GN=CADM1 PE=1 SV=2	3	1052.82	1	GADDAADADTAIINAEGGQNNSEEKKEYFI	371.534	1163.7	51884.9	0	297.162
Q9BY67	CADM1	Cell adhesion molecule 1 OS=Homo sapiens GN=CADM1 PE=1 SV=2	3	1052.82	1	GADDAADADTAIINAEGGQNNSEEKKEYFI	763.56	813.247	69.794	41724.9	496.469
Q9BY67	CADM1	Cell adhesion molecule 1 OS=Homo sapiens GN=CADM1 PE=1 SV=2	3	1052.82	1	GADDAADADTAIINAEGGQNNSEEKKEYFI	592.726	630.731	2318.56	1223.69	60708.3
Q9BY67	CADM1	Cell adhesion molecule 1 OS=Homo sapiens GN=CADM1 PE=1 SV=2	3	905.79	1	EGDALELTCEAIGKPQPVMVTWVR	734.191	397.392	4476.56	3736.81	53537.4
P04844	RPN2	Dolichyl-diphosphooligosaccharide--protein glycosyltransferase subunit 2 OS=Homo sapiens GN=RPN2 PE=1 SV=3	2	920.533	1	LQVTNVLSQPLTQATVK	804.62	20816	0	0	0
P04844	RPN2	Dolichyl-diphosphooligosaccharide--protein glycosyltransferase subunit 2 OS=Homo sapiens GN=RPN2 PE=1 SV=3	3	614.024	1	LQVTNVLSQPLTQATVK	864.15	12787.3	646.327	4761.85	326.115
P04844	RPN2	Dolichyl-diphosphooligosaccharide--protein glycosyltransferase subunit 2 OS=Homo sapiens GN=RPN2 PE=1 SV=3	3	1172.89	1	SNLDPSNVDSLFYAAQASQALSGCEISISNETK	2798.83	17403.9	817.882	647.501	5956.16
Q02413	DSG1	Desmoglein-1 OS=Homo sapiens GN=DSG1 PE=1 SV=2	2	875.927	1	YVMGNNPADLLAVDSR	2179.73	7248.31	0.646703	500.634	47.8931
P49755	TMEDA	Transmembrane emp24 domain-containing protein 10 OS=Homo sapiens GN=TMED10 PE=1 SV=2	2	650.864	1	IPDQLVILDMK	1854.17	10483.4	1290.22	2493.12	3364.68
P35232	PHB	Prohibitin OS=Homo sapiens GN=PHB PE=1 SV=1	2	928.023	1	NITYLPAGQSVLLQLPQ	89.7088	8884.31	0	459.51	825.86
O75694	NU155	Nuclear pore complex protein Nup155 OS=Homo sapiens GN=NUP155 PE=1 SV=1	3	575.29	1	HLLVSNVGGDGEEIER	75.754	5500.41	112.121	75.9515	67.0426
O75694	NU155	Nuclear pore complex protein Nup155 OS=Homo sapiens GN=NUP155 PE=1 SV=1	3	867.441	1	PSSLLGAAMPASTSAAALQEALENAGR	1335.97	9699.91	766.64	1490.33	1297.88
P26232	CTNA2	Catenin alpha-2 OS=Homo sapiens GN=CTNNA2 PE=1 SV=5	2	985.565	1	LLEPLVTQVTTLVNTSNK	184.726	104.891	18692.3	247.687	0
P26232	CTNA2	Catenin alpha-2 OS=Homo sapiens GN=CTNNA2 PE=1 SV=5	2	909.948	1	TSVQTEDDQLIAGQSAR	2357.29	529.657	24503.6	596.816	0
P02751	FINC	Fibronectin OS=Homo sapiens GN=FN1 PE=1 SV=4	2	585.23	0.9999	YQCYCYGR	29.868	0	18625.3	9.27652	62.4571
P02751	FINC	Fibronectin OS=Homo sapiens GN=FN1 PE=1 SV=4	2	611.266	0.9999	TFYSCTTEGR	315.453	71.3008	580.59	908.772	42242.6
P02751	FINC	Fibronectin OS=Homo sapiens GN=FN1 PE=1 SV=4	2	467.742	0.9999	ISCTIANR	25686.9	22585.2	39188	30657.8	39341.4
P02751	FINC	Fibronectin OS=Homo sapiens GN=FN1 PE=1 SV=4	2	678.354	0.9999	IYLYTLNDNAR	7873.18	3858.54	16478.9	4337.44	115645
P02751	FINC	Fibronectin OS=Homo sapiens GN=FN1 PE=1 SV=4	2	896.415	0.9999	TYLGNALVCTCYGGSR	35308.3	3679.79	508.475	452.547	14592.2
P02751	FINC	Fibronectin OS=Homo sapiens GN=FN1 PE=1 SV=4	2	1084.53	0.9999	ITYGETGGNSPVQEFTVPGSK	0	576.063	87472.2	608.89	90.1855
P02787	TRFE	Serotransferrin OS=Homo sapiens GN=TF PE=1 SV=3	2	598.281	0.9999	DSGFQMNQLR	2.39494e+06	464639	1910.26	1042.49	2455.26
P02787	TRFE	Serotransferrin OS=Homo sapiens GN=TF PE=1 SV=3	2	783.405	0.9999	DLLFRDDTVCLAK	905.073	297451	698.431	8097.6	1381.58
P02787	TRFE	Serotransferrin OS=Homo sapiens GN=TF PE=1 SV=3	2	783.405	0.9999	DLLFRDDTVCLAK	2764.45	273069	42640.4	19985.1	24438.7
P02787	TRFE	Serotransferrin OS=Homo sapiens GN=TF PE=1 SV=3	2	583.801	0.9999	HQTVPQNTGGK	95105.4	37300.1	72.3111	406.212	48.7
P02787	TRFE	Serotransferrin OS=Homo sapiens GN=TF PE=1 SV=3	2	563.29	0.9999	KASYLDCIR	220138	136753	562.423	5909.42	925.592
P02787	TRFE	Serotransferrin OS=Homo sapiens GN=TF PE=1 SV=3	2	638.822	0.9999	EFQLFSSPHGK	350.721	52738.1	3072.29	1205.6	3192.77
P02787	TRFE	Serotransferrin OS=Homo sapiens GN=TF PE=1 SV=3	2	638.822	0.9999	EFQLFSSPHGK	41602	4314.08	1612.44	6921.79	12411
Q9P2E9	RRBP1	Ribosome-binding protein 1 OS=Homo sapiens GN=RRBP1 PE=1 SV=4	2	498.773	0.9999	HLEEIVEK	45459.7	43295.6	32608.3	34306.1	29045
Q9P2E9	RRBP1	Ribosome-binding protein 1 OS=Homo sapiens GN=RRBP1 PE=1 SV=4	2	629.345	0.9999	SIEALLEAGQAR	1718.02	17293.3	3398.12	4681.72	205.05
Q9P2E9	RRBP1	Ribosome-binding protein 1 OS=Homo sapiens GN=RRBP1 PE=1 SV=4	2	752.376	0.9999	HPPAPAEPSSDLASK	8729.07	16637.5	567.834	7387.94	0
P07237	PDIA1	Protein disulfide-isomerase OS=Homo sapiens GN=P4HB PE=1 SV=3	2	533.762	0.9999	TVIDYNGER	62140.9	40615.8	55907.3	52287.1	45100.4
P07237	PDIA1	Protein disulfide-isomerase OS=Homo sapiens GN=P4HB PE=1 SV=3	3	484.573	0.9999	YKPESEELTAER	435.044	43.1342	2526.16	821.26	97601.4
P07237	PDIA1	Protein disulfide-isomerase OS=Homo sapiens GN=P4HB PE=1 SV=3	3	475.599	0.9999	YQLDKDGVVLFK	15193.5	337.809	1.45873	149.442	167.131
P05023	AT1A1	Sodium\potassium-transporting ATPase subunit alpha-1 OS=Homo sapiens GN=ATP1A1 PE=1 SV=1	2	631.345	0.9999	IVEIPFNSTNK	4498.43	1177.38	74585.6	2453.48	87762.6
P05023	AT1A1	Sodium\potassium-transporting ATPase subunit alpha-1 OS=Homo sapiens GN=ATP1A1 PE=1 SV=1	3	357.197	0.9999	GGDRIPADLR	1643.55	3095.51	668.222	1477.2	487.227
P02649	APOE	Apolipoprotein E OS=Homo sapiens GN=APOE PE=1 SV=1	2	474.768	0.9999	LAVYQAGAR	229.718	254.399	665.124	554.526	55623.4
P02649	APOE	Apolipoprotein E OS=Homo sapiens GN=APOE PE=1 SV=1	3	438.578	0.9999	AKLEEQAQQIR	8.55382	8.56952	36591.6	674.299	609.864
Q15084	PDIA6	Protein disulfide-isomerase A6 OS=Homo sapiens GN=PDIA6 PE=1 SV=1	3	462.925	0.9999	TGEAIVDAALSALR	0	0	9282.11	0	0
Q15084	PDIA6	Protein disulfide-isomerase A6 OS=Homo sapiens GN=PDIA6 PE=1 SV=1	4	646.087	0.9999	VGAVDADKHHSLGGQYGVQGFPTIK	85798.4	156.814	2585.88	305.238	19714.6
P27824	CALX	Calnexin OS=Homo sapiens GN=CANX PE=1 SV=2	3	433.883	0.9999	KPEDWDERPK	14284.7	14262.7	1949.69	7284.51	945.007
P27824	CALX	Calnexin OS=Homo sapiens GN=CANX PE=1 SV=2	3	486.242	0.9999	TPELNLDQFHDK	299.64	0	726.758	1024.87	41136.6
P27824	CALX	Calnexin OS=Homo sapiens GN=CANX PE=1 SV=2	3	816.382	0.9999	CESAPGCGVWQRPVIDNPNYK	149203	45720.2	4034.32	4519.73	390.337
P27824	CALX	Calnexin OS=Homo sapiens GN=CANX PE=1 SV=2	3	816.383	0.9999	CESAPGCGVWQRPVIDNPNYK	1403.29	1363.37	6981.7	2959.37	124677
P50454	SERPH	Serpin H1 OS=Homo sapiens GN=SERPINH1 PE=1 SV=2	3	546.584	0.9999	TGLYNYYDDEKEK	0.758892	125.59	142903	1179.91	4977.68
P14625	ENPL	Endoplasmin OS=Homo sapiens GN=HSP90B1 PE=1 SV=1	2	594.345	0.9999	SILFVPTSAPR	4529.89	24923.7	1512.72	1483.39	697.451
P14625	ENPL	Endoplasmin OS=Homo sapiens GN=HSP90B1 PE=1 SV=1	3	754.028	0.9999	FQSSHHPTDITSLDQYVER	864.383	22210.3	4203.58	939.863	4849.06
Q92896	GSLG1	Golgi apparatus protein 1 OS=Homo sapiens GN=GLG1 PE=1 SV=2	2	611.773	0.9999	LSSDCEDQIR	13657.6	4202.84	16881.2	11446	16970
P02786	TFR1	Transferrin receptor protein 1 OS=Homo sapiens GN=TFRC PE=1 SV=2	2	468.762	0.9999	AVLGTSNFK	7499.74	4141.98	1483.84	1040.08	1654.1
P02786	TFR1	Transferrin receptor protein 1 OS=Homo sapiens GN=TFRC PE=1 SV=2	2	613.831	0.9999	YNSQLLSFVR	3950.73	8337.8	3152.22	626.307	559.784
Q14247	SRC8	Src substrate cortactin OS=Homo sapiens GN=CTTN PE=1 SV=2	2	543.268	0.9999	SAVGFEYQGK	21652.2	16249.2	22738.7	16234.8	8235.94
P00505	AATM	Aspartate aminotransferase, mitochondrial OS=Homo sapiens GN=GOT2 PE=1 SV=3	2	765.906	0.9999	ASAELALGENSEVLK	3023.73	4867.18	13983.5	4602.33	117755
P00505	AATM	Aspartate aminotransferase, mitochondrial OS=Homo sapiens GN=GOT2 PE=1 SV=3	3	610.002	0.9999	ILIRPMYSNPPLNGAR	9714.69	11354.9	10850	57553	34955
P00505	AATM	Aspartate aminotransferase, mitochondrial OS=Homo sapiens GN=GOT2 PE=1 SV=3	2	514.75	0.9999	VGAFTMVCK	1290.46	228.402	1573.79	641.652	13108.1
P07355	ANXA2	Annexin A2 OS=Homo sapiens GN=ANXA2 PE=1 SV=2	2	543.747	0.9999	AYTNFDAER	26599	22158.2	30991.8	23497.9	36616.9
P07355	ANXA2	Annexin A2 OS=Homo sapiens GN=ANXA2 PE=1 SV=2	2	544.305	0.9999	DALNIETAIK	34421.2	26316.3	3127.55	2451.18	3909.32
P07355	ANXA2	Annexin A2 OS=Homo sapiens GN=ANXA2 PE=1 SV=2	3	615.641	0.9999	LSLEGDHSTPPSAYGSVK	1644	599.437	3656.9	57619.3	2989.37
P07355	ANXA2	Annexin A2 OS=Homo sapiens GN=ANXA2 PE=1 SV=2	2	771.93	0.9999	GVDEVTIVNILTNR	235.192	98.458	1357.84	37242.2	0
P08195	4F2	4F2 cell-surface antigen heavy chain OS=Homo sapiens GN=SLC3A2 PE=1 SV=3	2	602.341	0.9999	VILDLTPNYR	10663.2	28532.1	7078.41	1191.1	3927.73
P08195	4F2	4F2 cell-surface antigen heavy chain OS=Homo sapiens GN=SLC3A2 PE=1 SV=3	2	469.764	0.9999	LDYLSSLK	4.37748	107.979	11591.1	814.173	31678.8
Q12864	CAD17	Cadherin-17 OS=Homo sapiens GN=CDH17 PE=2 SV=3	3	630.002	0.9999	DEYGKPLSYPLEIHVK	415.651	222.243	5741.24	51523	2809.53
P08174	DAF	Complement decay-accelerating factor OS=Homo sapiens GN=CD55 PE=1 SV=4	3	724.026	0.9999	EIYCPAPPQIDNGIIQGER	2720.21	20542.8	3203.86	3146.17	680.408
P04843	RPN1	Dolichyl-diphosphooligosaccharide--protein glycosyltransferase subunit 1 OS=Homo sapiens GN=RPN1 PE=1 SV=1	2	509.244	0.9999	HFDETVNR	7208.08	24312.5	9625.72	12413	5528.23
Q14315	FLNC	Filamin-C OS=Homo sapiens GN=FLNC PE=1 SV=3	3	854.429	0.9999	AFGPGLEPTGCIVDKPAEFTIDAR	4695.01	19638.7	2766.2	1342.08	4873.16
Q07157	ZO1	Tight junction protein ZO-1 OS=Homo sapiens GN=TJP1 PE=1 SV=3	2	724.395	0.9999	AEQLASVQYTLPK	170.472	6603.96	2.61599	690.571	0
P62937	PPIA	Peptidyl-prolyl cis-trans isomerase A OS=Homo sapiens GN=PPIA PE=1 SV=2	3	611.311	0.9999	SIYGEKFEDENFILK	6970.1	560.885	7055.54	183512	4393.46
P62937	PPIA	Peptidyl-prolyl cis-trans isomerase A OS=Homo sapiens GN=PPIA PE=1 SV=2	2	690.385	0.9999	VSFELFADKVPK	76476	1977.26	44109.3	4703.84	888.231
P62937	PPIA	Peptidyl-prolyl cis-trans isomerase A OS=Homo sapiens GN=PPIA PE=1 SV=2	2	690.384	0.9999	VSFELFADKVPK	96.0691	18.3127	64562.4	4349.09	131.048
P62937	PPIA	Peptidyl-prolyl cis-trans isomerase A OS=Homo sapiens GN=PPIA PE=1 SV=2	2	577.791	0.9999	FEDENFILK	841.206	816.36	56666.1	2212.24	217671
P62937	PPIA	Peptidyl-prolyl cis-trans isomerase A OS=Homo sapiens GN=PPIA PE=1 SV=2	2	528.275	0.9999	VSFELFADK	884.699	263.951	2210.68	901.91	62433.2
P27797	CALR	Calreticulin OS=Homo sapiens GN=CALR PE=1 SV=1	3	600.953	0.9999	IKDPDASKPEDWDER	36024.9	29478.3	1060.12	8706.16	952.877
P14314	GLU2B	Glucosidase 2 subunit beta OS=Homo sapiens GN=PRKCSH PE=1 SV=2	2	618.302	0.9999	SLEDQVEMLR	422.678	3572.32	2090.8	2007.74	80461.8
P14314	GLU2B	Glucosidase 2 subunit beta OS=Homo sapiens GN=PRKCSH PE=1 SV=2	2	618.303	0.9999	SLEDQVEMLR	25789.3	1099.22	813.658	6830.07	1923.12
P27487	DPP4	Dipeptidyl peptidase 4 OS=Homo sapiens GN=DPP4 PE=1 SV=2	2	552.283	0.9999	VLEDNSALDK	23103.1	20411.4	21810.6	17832	27116.7
P05556	ITB1	Integrin beta-1 OS=Homo sapiens GN=ITGB1 PE=1 SV=2	2	662.845	0.9999	TVMPYISTTPAK	10434.1	19161.2	26.6557	22347	64.3955
P05556	ITB1	Integrin beta-1 OS=Homo sapiens GN=ITGB1 PE=1 SV=2	2	668.308	0.9999	SNGLICGGNGVCK	9893.09	3473.99	6729.72	4208.61	6104.82
P21912	SDHB	Succinate dehydrogenase [ubiquinone] iron-sulfur subunit, mitochondrial OS=Homo sapiens GN=SDHB PE=1 SV=3	2	456.192	0.9999	DDFTEER	10440	5387.88	11186.3	8786.14	10891.1
Q9Y624	JAM1	Junctional adhesion molecule A OS=Homo sapiens GN=F11R PE=1 SV=1	2	477.731	0.9999	ITASYEDR	5961.83	3619.58	8361.93	5414.92	10091.9
O95994	AGR2	Anterior gradient protein 2 homolog OS=Homo sapiens GN=AGR2 PE=1 SV=1	3	695.692	0.9999	LYAYEPADTALLLDNMKK	12743.4	170814	8721.57	8682.53	26832.4
P16615	AT2A2	Sarcoplasmic\endoplasmic reticulum calcium ATPase 2 OS=Homo sapiens GN=ATP2A2 PE=1 SV=1	2	556.77	0.9999	MNVFDTELK	3529.4	9764.78	68.4913	2471.73	556.484
P53621	COPA	Coatomer subunit alpha OS=Homo sapiens GN=COPA PE=1 SV=2	2	595.844	0.9999	TLDLPIYVTR	692.364	9123.36	2769.06	93.1596	558.157
P53621	COPA	Coatomer subunit alpha OS=Homo sapiens GN=COPA PE=1 SV=2	2	528.772	0.9999	GFFEGTIASK	5936.54	12629	2005.87	1711.3	1561.45
O94907	DKK1	Dickkopf-related protein 1 OS=Homo sapiens GN=DKK1 PE=1 SV=1	2	503.244	0.9999	GQEGSVCLR	955.672	585.191	885.557	786.436	21488.2
O94907	DKK1	Dickkopf-related protein 1 OS=Homo sapiens GN=DKK1 PE=1 SV=1	2	672.262	0.9999	SSDCASGLCCAR	1.56492	0	308.945	0	25518.5
P67809	YBOX1	Nuclease-sensitive element-binding protein 1 OS=Homo sapiens GN=YBX1 PE=1 SV=3	2	898.418	0.9999	SVGDGETVEFDVVEGEK	18276.7	278.623	70.9249	375.919	1531.29
Q14697	GANAB	Neutral alpha-glucosidase AB OS=Homo sapiens GN=GANAB PE=1 SV=3	3	382.553	0.9999	SIRPGLSPYR	3464.45	3197.37	460.039	1465.77	759.419
Q8TDB8	GTR14	Solute carrier family 2, facilitated glucose transporter member 14 OS=Homo sapiens GN=SLC2A14 PE=2 SV=1	2	552.828	0.9999	QVTVLELFR	10655.3	53329.9	9421.82	12618	79991.5
O00592	PODXL	Podocalyxin OS=Homo sapiens GN=PODXL PE=1 SV=2	2	642.881	0.9999	LASVPGSQTVVVK	1687.85	2004.55	149524	2506.5	1373.06
P17931	LEG3	Galectin-3 OS=Homo sapiens GN=LGALS3 PE=1 SV=5	3	552.988	0.9999	MLITILGTVKPNANR	46791.1	598.507	32198.8	1286.54	7747.63
O14745	NHRF1	Na(+)\H(+) exchange regulatory cofactor NHE-RF1 OS=Homo sapiens GN=SLC9A3R1 PE=1 SV=4	2	513.778	0.9999	LVEPGSPAEK	12252.7	6143.1	15216.8	12208.5	17570.7
Q8WTV0	SCRB1	Scavenger receptor class B member 1 OS=Homo sapiens GN=SCARB1 PE=1 SV=1	2	459.257	0.9999	SVAGIGQTGK	7074.85	5421.99	19043.3	17670.9	21935.5
P11279	LAMP1	Lysosome-associated membrane glycoprotein 1 OS=Homo sapiens GN=LAMP1 PE=1 SV=3	2	517.284	0.9999	TVESITDIR	64985.2	41017.7	29871.8	51973.3	34610.3
Q00325	MPCP	Phosphate carrier protein, mitochondrial OS=Homo sapiens GN=SLC25A3 PE=1 SV=2	2	681.364	0.9999	IQTQPGYANTLR	2973.21	18967.8	65788.4	3947.97	14089.4
Q00325	MPCP	Phosphate carrier protein, mitochondrial OS=Homo sapiens GN=SLC25A3 PE=1 SV=2	2	522.25	0.9999	QIPYTMMK	3035.45	18012.4	6879.86	6192.1	3661.16
P05090	APOD	Apolipoprotein D OS=Homo sapiens GN=APOD PE=1 SV=1	2	829.389	0.9999	CPNPPVQENFDVNK	3242.06	1412.84	45425.4	3207.57	4644.78
P05090	APOD	Apolipoprotein D OS=Homo sapiens GN=APOD PE=1 SV=1	2	436.254	0.9999	VLNQELR	152.769	345.781	9292.66	138.255	445.218
P11166	GTR1	Solute carrier family 2, facilitated glucose transporter member 1 OS=Homo sapiens GN=SLC2A1 PE=1 SV=2	2	495.804	0.9999	VTILELFR	40.2813	4.61552	0	16166.7	367.611
P11166	GTR1	Solute carrier family 2, facilitated glucose transporter member 1 OS=Homo sapiens GN=SLC2A1 PE=1 SV=2	2	495.804	0.9999	VTILELFR	43.6073	10775	1328.56	1243.34	0
P45880	VDAC2	Voltage-dependent anion-selective channel protein 2 OS=Homo sapiens GN=VDAC2 PE=1 SV=2	2	647.339	0.9999	YQLDPTASISAK	29000.6	41686.6	4988.48	11348.8	659.624
P45880	VDAC2	Voltage-dependent anion-selective channel protein 2 OS=Homo sapiens GN=VDAC2 PE=1 SV=2	3	701.734	0.9999	VNNSSLIGVGYTQTLRPGVK	719.58	235.582	48.4803	57699.1	440.631
P12830	CADH1	Cadherin-1 OS=Homo sapiens GN=CDH1 PE=1 SV=3	2	521.252	0.9999	MALEVGDYK	10515	10189.2	17760.7	13713.3	13396
P20674	COX5A	Cytochrome c oxidase subunit 5A, mitochondrial OS=Homo sapiens GN=COX5A PE=1 SV=2	2	511.768	0.9999	LNDFASTVR	19023.4	12567.8	20321.8	19096.1	2939.21
P20674	COX5A	Cytochrome c oxidase subunit 5A, mitochondrial OS=Homo sapiens GN=COX5A PE=1 SV=2	2	846.932	0.9999	GINTLVTYDMVPEPK	8.82223	16285.2	398.632	1446.31	462.85
P81605	DCD	Dermcidin OS=Homo sapiens GN=DCD PE=1 SV=2	3	487.26	0.9999	LGKDAVEDLESVGK	41.8046	120.495	4616.11	10463.2	515.122
P10606	COX5B	Cytochrome c oxidase subunit 5B, mitochondrial OS=Homo sapiens GN=COX5B PE=1 SV=2	2	657.882	0.9999	KGLDPYNVLAPK	15373.8	14058.3	21619.5	15301.4	3224.33
P60953	CDC42	Cell division control protein 42 homolog OS=Homo sapiens GN=CDC42 PE=1 SV=2	2	599.793	0.9999	YVECSALTQK	4458.23	6151.16	512.609	191.385	278.218
O60716	CTND1	Catenin delta-1 OS=Homo sapiens GN=CTNND1 PE=1 SV=1	2	643.83	0.9999	QDVYGPQPQVR	6219.65	8639.9	7299.99	5665.95	150.46
P07942	LAMB1	Laminin subunit beta-1 OS=Homo sapiens GN=LAMB1 PE=1 SV=2	3	722.395	0.9999	VESLSQVEVILQHSAADIAR	1183.62	4512.67	5293.67	213.677	620.041
P51149	RAB7A	Ras-related protein Rab-7a OS=Homo sapiens GN=RAB7A PE=1 SV=1	2	795.419	0.9999	EAINVEQAFQTIAR	1323.71	15190.8	1982.46	1552.36	2513.12
P05067	A4	Amyloid beta A4 protein OS=Homo sapiens GN=APP PE=1 SV=3	2	482.233	0.9999	VEAMLNDR	18353.5	14897.1	40160	31236.3	31548.7
P14174	MIF	Macrophage migration inhibitory factor OS=Homo sapiens GN=MIF PE=1 SV=4	2	644.347	0.9999	PMFIVNTNVPR	4154.03	18376.5	13620.7	8791.09	2710.95
Q96HS1	PGAM5	Serine\threonine-protein phosphatase PGAM5, mitochondrial OS=Homo sapiens GN=PGAM5 PE=1 SV=2	2	559.807	0.9999	AIETTDIISR	5625.9	5834.59	265.664	3219.67	109.862
Q99805	TM9S2	Transmembrane 9 superfamily member 2 OS=Homo sapiens GN=TM9SF2 PE=1 SV=1	3	534.62	0.9999	RPSENLGQVLFGER	575.02	4980.23	214.493	537.975	228.145
Q9NZ01	TECR	Very-long-chain enoyl-CoA reductase OS=Homo sapiens GN=TECR PE=1 SV=1	3	497.923	0.9999	MKHYEVEILDAK	3344.6	8838.15	114.5	119.669	15.8877
Q9NZ01	TECR	Very-long-chain enoyl-CoA reductase OS=Homo sapiens GN=TECR PE=1 SV=1	2	608.816	0.9999	HYEVEILDAK	338.301	5100.66	76.3989	31.4873	193.24
P15328	FOLR1	Folate receptor alpha OS=Homo sapiens GN=FOLR1 PE=1 SV=3	2	654.819	0.9999	TELLNVCMNAK	3860.14	8451.82	0	9899.52	332.342
Q5ZPR3	CD276	CD276 antigen OS=Homo sapiens GN=CD276 PE=1 SV=1	3	874.136	0.9999	SPTGAVEVQVPEDPVVALVGTDATLR	367.413	21250	147.668	1196.74	180.982
P02751	FINC	Fibronectin OS=Homo sapiens GN=FN1 PE=1 SV=4	2	380.24	0.9998	LTVGLTR	14122.6	13913	13151.2	13130.4	9581.6
P02751	FINC	Fibronectin OS=Homo sapiens GN=FN1 PE=1 SV=4	2	662.361	0.9998	LGVRPSQGGEAPR	9189	11440.3	9921.66	10381.3	4854.7
P02751	FINC	Fibronectin OS=Homo sapiens GN=FN1 PE=1 SV=4	2	678.353	0.9998	IYLYTLNDNAR	3789.38	2600.41	94756.7	5244.42	15118.9
P02751	FINC	Fibronectin OS=Homo sapiens GN=FN1 PE=1 SV=4	3	858.117	0.9998	TKTETITGFQVDAVPANGQTPIQR	2614.39	2314.9	135711	12869	6746.42
P02751	FINC	Fibronectin OS=Homo sapiens GN=FN1 PE=1 SV=4	4	726.564	0.9998	GFNCESKPEAEETCFDKYTGNTYR	219.063	48547.4	724.197	3120.25	293.083
P02751	FINC	Fibronectin OS=Homo sapiens GN=FN1 PE=1 SV=4	2	896.415	0.9998	TYLGNALVCTCYGGSR	701.088	2459.78	65928.5	18338.6	8748.48
P02751	FINC	Fibronectin OS=Homo sapiens GN=FN1 PE=1 SV=4	2	1084.53	0.9998	ITYGETGGNSPVQEFTVPGSK	99.3346	726.129	269.057	43483.4	60.3194
Q9P2E9	RRBP1	Ribosome-binding protein 1 OS=Homo sapiens GN=RRBP1 PE=1 SV=4	2	509.763	0.9998	LQSSEAEVR	16332.3	18678.3	24361	17602.7	23181
P07237	PDIA1	Protein disulfide-isomerase OS=Homo sapiens GN=P4HB PE=1 SV=3	2	611.816	0.9998	LITLEEEMTK	63774.3	68270.1	3835.01	92942	1464.71
P07237	PDIA1	Protein disulfide-isomerase OS=Homo sapiens GN=P4HB PE=1 SV=3	3	484.573	0.9998	YKPESEELTAER	1177.54	264.356	542.019	16899.8	719.023
P07237	PDIA1	Protein disulfide-isomerase OS=Homo sapiens GN=P4HB PE=1 SV=3	3	447.883	0.9998	NFEDVAFDEKK	17323.9	12321.6	38.5814	20.2322	316.024
P05023	AT1A1	Sodium\potassium-transporting ATPase subunit alpha-1 OS=Homo sapiens GN=ATP1A1 PE=1 SV=1	2	470.249	0.9998	KYGTDLSR	766.243	3398.13	573.835	1458.52	388.064
P05023	AT1A1	Sodium\potassium-transporting ATPase subunit alpha-1 OS=Homo sapiens GN=ATP1A1 PE=1 SV=1	3	555.61	0.9998	DKYEPAAVSEQGDKK	4320.68	9611.04	3311.21	3847.86	2000.09
P02649	APOE	Apolipoprotein E OS=Homo sapiens GN=APOE PE=1 SV=1	2	657.363	0.9998	AKLEEQAQQIR	28116.1	17994.3	60111.7	59058.7	27366.3
Q15084	PDIA6	Protein disulfide-isomerase A6 OS=Homo sapiens GN=PDIA6 PE=1 SV=1	2	757.88	0.9998	NLEPEWAAAASEVK	70930.9	11786.7	5644.6	6739.91	17344.7
Q15084	PDIA6	Protein disulfide-isomerase A6 OS=Homo sapiens GN=PDIA6 PE=1 SV=1	2	757.88	0.9998	NLEPEWAAAASEVK	8168.15	5096.4	1809.07	3817.46	85131.7
P50454	SERPH	Serpin H1 OS=Homo sapiens GN=SERPINH1 PE=1 SV=2	2	463.806	0.9998	KAVAISLPK	0	41.5667	114.277	17055.7	0
P50454	SERPH	Serpin H1 OS=Homo sapiens GN=SERPINH1 PE=1 SV=2	2	647.865	0.9998	LQIVEMPLAHK	15592.2	17523.3	57.8231	790.089	9.02139
Q92896	GSLG1	Golgi apparatus protein 1 OS=Homo sapiens GN=GLG1 PE=1 SV=2	3	520.245	0.9998	DAHSQGEVVSCLEK	4550.83	6604.17	3523.05	3425.73	1364.12
P02786	TFR1	Transferrin receptor protein 1 OS=Homo sapiens GN=TFRC PE=1 SV=2	2	548.271	0.9998	LTTDFGNAEK	17566.1	23477.1	12289.2	10615.8	6037.11
Q14247	SRC8	Src substrate cortactin OS=Homo sapiens GN=CTTN PE=1 SV=2	3	384.201	0.9998	YGVQADRVDK	6602.8	4468.84	4832.66	5566.85	3420.94
P00505	AATM	Aspartate aminotransferase, mitochondrial OS=Homo sapiens GN=GOT2 PE=1 SV=3	2	478.22	0.9998	NMGLYGER	8945.05	8179.61	12706.4	10849.7	14109.3
P08195	4F2	4F2 cell-surface antigen heavy chain OS=Homo sapiens GN=SLC3A2 PE=1 SV=3	2	469.765	0.9998	LDYLSSLK	1704.63	8.95983	21931.6	344.695	554.184
P08174	DAF	Complement decay-accelerating factor OS=Homo sapiens GN=CD55 PE=1 SV=4	2	449.703	0.9998	CEESFVK	9578.52	6188.18	17687.8	10984	17130.8
P14314	GLU2B	Glucosidase 2 subunit beta OS=Homo sapiens GN=PRKCSH PE=1 SV=2	3	439.234	0.9998	TVKEEAEKPER	21463.2	13966.1	11803.9	16105.5	7048.67
P27487	DPP4	Dipeptidyl peptidase 4 OS=Homo sapiens GN=DPP4 PE=1 SV=2	2	739.344	0.9998	VTCLSCELNPER	18783.4	14420.9	46.7889	26.4256	50.4264
O95994	AGR2	Anterior gradient protein 2 homolog OS=Homo sapiens GN=AGR2 PE=1 SV=1	2	634.823	0.9998	HLSPDGQYVPR	19941	14234.6	2723.75	11419.4	579.196
P07602	SAP	Prosaposin OS=Homo sapiens GN=PSAP PE=1 SV=2	3	537.621	0.9998	HCLQTVWNKPTVK	8101.47	59.0523	6.48771	0	0
P67809	YBOX1	Nuclease-sensitive element-binding protein 1 OS=Homo sapiens GN=YBX1 PE=1 SV=3	4	810.639	0.9998	RPQYSNPPVQGEVMEGADNQGAGEQGRPVR	6757.01	2283.52	18086.6	112776	1842.78
P67809	YBOX1	Nuclease-sensitive element-binding protein 1 OS=Homo sapiens GN=YBX1 PE=1 SV=3	4	810.638	0.9998	RPQYSNPPVQGEVMEGADNQGAGEQGRPVR	52193.6	887.64	764.879	538.615	2023.95
O43852	CALU	Calumenin OS=Homo sapiens GN=CALU PE=1 SV=2	3	511.584	0.9998	HLVYESDQNKDGK	0	0	21746.8	18.3067	66.7461
Q92544	TM9S4	Transmembrane 9 superfamily member 4 OS=Homo sapiens GN=TM9SF4 PE=1 SV=2	2	544.809	0.9998	FEVIPQSIR	2094.75	8594.57	4385.92	403.626	2087.99
P17931	LEG3	Galectin-3 OS=Homo sapiens GN=LGALS3 PE=1 SV=5	3	425.21	0.9998	GNDVAFHFNPR	226.715	88.1734	24842.7	106.148	9304.23
P17931	LEG3	Galectin-3 OS=Homo sapiens GN=LGALS3 PE=1 SV=5	2	637.31	0.9998	GNDVAFHFNPR	16865.7	14003	147.583	597.821	277.309
P23284	PPIB	Peptidyl-prolyl cis-trans isomerase B OS=Homo sapiens GN=PPIB PE=1 SV=2	2	516.283	0.9998	VLEGMEVVR	283.973	194.725	3341.76	491.852	31242
P11169	GTR3	Solute carrier family 2, facilitated glucose transporter member 3 OS=Homo sapiens GN=SLC2A3 PE=2 SV=1	3	699.984	0.9998	DGVMEMNSIEPAKETTTNV	3.92987	2480.57	609.27	24298.1	80.4628
P11166	GTR1	Solute carrier family 2, facilitated glucose transporter member 1 OS=Homo sapiens GN=SLC2A1 PE=1 SV=2	3	833.403	0.9998	QGGASQSDKTPEELFHPLGADSQV	640.677	588.601	153250	4337.1	2455.58
P11166	GTR1	Solute carrier family 2, facilitated glucose transporter member 1 OS=Homo sapiens GN=SLC2A1 PE=1 SV=2	2	495.804	0.9998	VTILELFR	13706.2	0	1949.13	32.3594	847.806
P08574	CY1	Cytochrome c1, heme protein, mitochondrial OS=Homo sapiens GN=CYC1 PE=1 SV=3	3	638.986	0.9998	LFDYFPKPYPNSEAAR	1694.31	20861.5	2988.59	907.613	2031.04
P45880	VDAC2	Voltage-dependent anion-selective channel protein 2 OS=Homo sapiens GN=VDAC2 PE=1 SV=2	2	470.736	0.9998	NNFAVGYR	5334.35	6464.82	4554.71	4205.96	4679.17
P20674	COX5A	Cytochrome c oxidase subunit 5A, mitochondrial OS=Homo sapiens GN=COX5A PE=1 SV=2	2	511.768	0.9998	LNDFASTVR	888.651	174.665	1759.26	1062.07	59168.9
P12270	TPR	Nucleoprotein TPR OS=Homo sapiens GN=TPR PE=1 SV=3	2	638.32	0.9998	ASTALSNEQQAR	3251.38	4108.44	5868.94	4231.95	6196.67
P14174	MIF	Macrophage migration inhibitory factor OS=Homo sapiens GN=MIF PE=1 SV=4	2	522.799	0.9998	LLCGLLAER	523.83	402.563	4561.15	105.311	45819.3
P02751	FINC	Fibronectin OS=Homo sapiens GN=FN1 PE=1 SV=4	2	678.347	0.9997	IYLYTLNDNAR	2679.94	2574.12	18294.6	92938.7	5699.4
P02751	FINC	Fibronectin OS=Homo sapiens GN=FN1 PE=1 SV=4	2	576.281	0.9997	FTNIGPDTMR	328.029	284.145	1210.83	1059.14	45213.9
P02787	TRFE	Serotransferrin OS=Homo sapiens GN=TF PE=1 SV=3	4	503.511	0.9997	SETKDLLFRDDTVCLAK	209140	541.854	4609.14	998.281	20947.8
P07237	PDIA1	Protein disulfide-isomerase OS=Homo sapiens GN=P4HB PE=1 SV=3	2	579.801	0.9997	SNFAEALAAHK	1060.73	100.396	23805.9	2206.94	7221.38
P07237	PDIA1	Protein disulfide-isomerase OS=Homo sapiens GN=P4HB PE=1 SV=3	2	603.811	0.9997	LITLEEEMTK	53585.8	28201.5	7120.89	199051	2761.09
P05023	AT1A1	Sodium\potassium-transporting ATPase subunit alpha-1 OS=Homo sapiens GN=ATP1A1 PE=1 SV=1	2	618.858	0.9997	LNIPVSQVNPR	25121.7	52536.9	1075.33	2031.05	216.504
P50454	SERPH	Serpin H1 OS=Homo sapiens GN=SERPINH1 PE=1 SV=2	3	479.917	0.9997	DEEVHAGLGELLR	789.379	4416.5	257.774	3.67089	139.777
Q92896	GSLG1	Golgi apparatus protein 1 OS=Homo sapiens GN=GLG1 PE=1 SV=2	3	501.908	0.9997	VAELSSDDFHLDR	0	9657.29	22.1739	259.448	450.35
Q92896	GSLG1	Golgi apparatus protein 1 OS=Homo sapiens GN=GLG1 PE=1 SV=2	2	847.405	0.9997	ALNEACESVIQTACK	5577.3	13657.9	43661.1	4246.95	87.8011
P02786	TFR1	Transferrin receptor protein 1 OS=Homo sapiens GN=TFRC PE=1 SV=2	2	717.418	0.9997	VSASPLLYTLIEK	636.13	38419.4	1107.58	1311.02	552.436
P00505	AATM	Aspartate aminotransferase, mitochondrial OS=Homo sapiens GN=GOT2 PE=1 SV=3	3	610.002	0.9997	ILIRPMYSNPPLNGAR	1801.98	17796.8	85.9446	201.986	22.9338
P00505	AATM	Aspartate aminotransferase, mitochondrial OS=Homo sapiens GN=GOT2 PE=1 SV=3	2	465.275	0.9997	KAEAQIAAK	310.692	272.171	1443.23	777.15	2643.08
P07355	ANXA2	Annexin A2 OS=Homo sapiens GN=ANXA2 PE=1 SV=2	3	535.594	0.9997	SYSPYDMLESIRK	599.056	14216	657.159	77.6976	57.0421
P08195	4F2	4F2 cell-surface antigen heavy chain OS=Homo sapiens GN=SLC3A2 PE=1 SV=3	2	464.755	0.9997	VAGSPGWVR	7358.55	3956.63	9143.38	8240.9	7691.51
P08195	4F2	4F2 cell-surface antigen heavy chain OS=Homo sapiens GN=SLC3A2 PE=1 SV=3	4	895.695	0.9997	NQKDDVAQTDLLQIDPNFGSKEDFDSLLQSAK	33805.9	341.777	3375.86	2098.94	1368.37
Q12864	CAD17	Cadherin-17 OS=Homo sapiens GN=CDH17 PE=2 SV=3	2	650.351	0.9997	AENPEPLVFGVK	644.958	1827.01	43734.9	3271.79	4559.22
P04843	RPN1	Dolichyl-diphosphooligosaccharide--protein glycosyltransferase subunit 1 OS=Homo sapiens GN=RPN1 PE=1 SV=1	2	535.797	0.9997	TVDLSSHLAK	4543.56	10193.1	1973.05	3385.14	3737.44
Q07157	ZO1	Tight junction protein ZO-1 OS=Homo sapiens GN=TJP1 PE=1 SV=3	2	531.277	0.9997	TVEEVTVER	5889.96	8246.42	8337.19	5372.2	10378.4
P62937	PPIA	Peptidyl-prolyl cis-trans isomerase A OS=Homo sapiens GN=PPIA PE=1 SV=2	2	577.791	0.9997	FEDENFILK	3723	43383.1	442.164	17179.9	10119.6
P62937	PPIA	Peptidyl-prolyl cis-trans isomerase A OS=Homo sapiens GN=PPIA PE=1 SV=2	3	507.92	0.9997	VKEGMNIVEAMER	29.4803	37.5138	4882.01	71.2683	52053.6
P27797	CALR	Calreticulin OS=Homo sapiens GN=CALR PE=1 SV=1	2	705.82	0.9997	EQFLDGDGWTSR	930.861	16289.8	713.817	1875.58	716.521
P27487	DPP4	Dipeptidyl peptidase 4 OS=Homo sapiens GN=DPP4 PE=1 SV=2	2	789.396	0.9997	LGTFEVEDQIEAAR	36645.7	1853.26	1616.75	6657.76	1472.6
Q07065	CKAP4	Cytoskeleton-associated protein 4 OS=Homo sapiens GN=CKAP4 PE=1 SV=2	2	737.393	0.9997	SVGELPSTVESLQK	1721.35	2990.13	5588.53	15874.1	70292.9
Q07065	CKAP4	Cytoskeleton-associated protein 4 OS=Homo sapiens GN=CKAP4 PE=1 SV=2	2	737.394	0.9997	SVGELPSTVESLQK	16252.8	224.866	42807.9	1359.18	460.213
Q96AG4	LRC59	Leucine-rich repeat-containing protein 59 OS=Homo sapiens GN=LRRC59 PE=1 SV=1	2	567.796	0.9997	ATILDLSCNK	13465.2	7932.49	2877.25	7511.41	292.775
Q96AG4	LRC59	Leucine-rich repeat-containing protein 59 OS=Homo sapiens GN=LRRC59 PE=1 SV=1	3	579.659	0.9997	WLDLKDNPLDPVLAK	122.787	5.62597	0	24330.3	572.566
Q8TDB8	GTR14	Solute carrier family 2, facilitated glucose transporter member 14 OS=Homo sapiens GN=SLC2A14 PE=2 SV=1	2	552.825	0.9997	QVTVLELFR	90234	31.7442	101.384	506.02	274.677
Q8TDB8	GTR14	Solute carrier family 2, facilitated glucose transporter member 14 OS=Homo sapiens GN=SLC2A14 PE=2 SV=1	2	441.223	0.9997	TFEDITR	16476	441.456	91699	10329.2	2390.08
O00592	PODXL	Podocalyxin OS=Homo sapiens GN=PODXL PE=1 SV=2	2	545.799	0.9997	LPAKDVYER	3216.19	3165.16	4662.25	4921.03	3262.76
O43852	CALU	Calumenin OS=Homo sapiens GN=CALU PE=1 SV=2	3	527.261	0.9997	TFDQLTPEESKER	20288.7	1041.5	131000	8509.33	93333.8
P11279	LAMP1	Lysosome-associated membrane glycoprotein 1 OS=Homo sapiens GN=LAMP1 PE=1 SV=3	2	923.517	0.9997	FFLQGIQLNTILPDAR	281.315	3657.15	1481.6	141.434	795.34
P11169	GTR3	Solute carrier family 2, facilitated glucose transporter member 3 OS=Homo sapiens GN=SLC2A3 PE=2 SV=1	3	699.984	0.9997	DGVMEMNSIEPAKETTTNV	3453.96	22845.3	5.13256	587.62	420.283
P11169	GTR3	Solute carrier family 2, facilitated glucose transporter member 3 OS=Homo sapiens GN=SLC2A3 PE=2 SV=1	2	517.29	0.9997	SVEMLILGR	4638.71	10240.5	15717.6	4350.87	132.209
P11169	GTR3	Solute carrier family 2, facilitated glucose transporter member 3 OS=Homo sapiens GN=SLC2A3 PE=2 SV=1	3	785.365	0.9997	SGKDGVMEMNSIEPAKETTTNV	18593.8	2256.78	29900.4	17985.7	383258
P11169	GTR3	Solute carrier family 2, facilitated glucose transporter member 3 OS=Homo sapiens GN=SLC2A3 PE=2 SV=1	2	710.824	0.9997	DGVMEMNSIEPAK	10668.3	2365.38	0	2052.24	281.465
P54707	AT12A	Potassium-transporting ATPase alpha chain 2 OS=Homo sapiens GN=ATP12A PE=1 SV=3	2	544.301	0.9997	LIIVEGCQR	21720.7	30842.5	13114.8	18064.7	761.352
O14983	AT2A1	Sarcoplasmic\endoplasmic reticulum calcium ATPase 1 OS=Homo sapiens GN=ATP2A1 PE=1 SV=1	2	787.937	0.9997	VDQSILTGESVSVIK	5.70854	17175.6	1.51552	3.62034	153.723
P54920	SNAA	Alpha-soluble NSF attachment protein OS=Homo sapiens GN=NAPA PE=1 SV=3	2	588.282	0.9997	TIQGDEEDLR	2693.77	6113.38	5373.57	5784.24	5283.4
P54920	SNAA	Alpha-soluble NSF attachment protein OS=Homo sapiens GN=NAPA PE=1 SV=3	2	627.296	0.9997	IEEACEIYAR	2808.98	2256.2	2.33911	2934.97	224.019
P54920	SNAA	Alpha-soluble NSF attachment protein OS=Homo sapiens GN=NAPA PE=1 SV=3	2	592.785	0.9997	AIEIYTDMGR	2062.73	1903.82	1765.45	3511.74	879.431
O00584	RNT2	Ribonuclease T2 OS=Homo sapiens GN=RNASET2 PE=1 SV=2	2	388.24	0.9997	VYGVIPK	9656.44	9175.6	9974.8	8776.92	8129.83
P08962	CD63	CD63 antigen OS=Homo sapiens GN=CD63 PE=1 SV=2	2	637.285	0.9997	VMSEFNNNFR	3430.11	6547.6	87.6363	8626.85	132.483
P02787	TRFE	Serotransferrin OS=Homo sapiens GN=TF PE=1 SV=3	3	569.258	0.9996	FDEFFSEGCAPGSKK	34964.9	71333.5	948.242	56236	2791.63
Q9P2E9	RRBP1	Ribosome-binding protein 1 OS=Homo sapiens GN=RRBP1 PE=1 SV=4	3	688.004	0.9996	TAGPLESSETEEASQLKER	1249.33	55749.7	10976.4	148.046	242.835
Q9P2E9	RRBP1	Ribosome-binding protein 1 OS=Homo sapiens GN=RRBP1 PE=1 SV=4	2	970.974	0.9996	TLVSTVGSMVFNEGEAQR	7446.85	25656.7	189868	4449.88	33445
P05023	AT1A1	Sodium\potassium-transporting ATPase subunit alpha-1 OS=Homo sapiens GN=ATP1A1 PE=1 SV=1	2	631.345	0.9996	IVEIPFNSTNK	67955.5	53481.9	56892.9	31625.2	82805.8
P02649	APOE	Apolipoprotein E OS=Homo sapiens GN=APOE PE=1 SV=1	2	484.781	0.9996	LGPLVEQGR	9465.85	2294.39	160.401	14719.4	501.037
P27824	CALX	Calnexin OS=Homo sapiens GN=CANX PE=1 SV=2	2	531.305	0.9996	GTLSGWILSK	1189.77	99.0257	1584.63	327.341	55485.2
P50454	SERPH	Serpin H1 OS=Homo sapiens GN=SERPINH1 PE=1 SV=2	2	399.759	0.9996	AVAISLPK	12.6674	1.28893	54947.6	240.873	62.5118
P50454	SERPH	Serpin H1 OS=Homo sapiens GN=SERPINH1 PE=1 SV=2	4	500.782	0.9996	LSSLIILMPHHVEPLER	13.4403	20.9795	0	63865.5	441.963
P50454	SERPH	Serpin H1 OS=Homo sapiens GN=SERPINH1 PE=1 SV=2	3	426.914	0.9996	LQIVEMPLAHK	896.476	3515.71	653.657	458.571	424.388
P07355	ANXA2	Annexin A2 OS=Homo sapiens GN=ANXA2 PE=1 SV=2	3	615.641	0.9996	LSLEGDHSTPPSAYGSVK	231.283	47451	110.727	10.0274	383.617
P08195	4F2	4F2 cell-surface antigen heavy chain OS=Homo sapiens GN=SLC3A2 PE=1 SV=3	3	623	0.9996	IGDLQAFQGHGAGNLAGLK	518.931	1325.16	120745	808.932	1904.7
Q12864	CAD17	Cadherin-17 OS=Homo sapiens GN=CDH17 PE=2 SV=3	2	617.347	0.9996	NPSYNLVISVK	28623.1	1485.09	4123.6	1128.67	1511.22
Q12864	CAD17	Cadherin-17 OS=Homo sapiens GN=CDH17 PE=2 SV=3	3	590.313	0.9996	IDHVTGEIFSVAPLDR	7285.43	19006.3	9888.35	7042.13	2930.92
P08174	DAF	Complement decay-accelerating factor OS=Homo sapiens GN=CD55 PE=1 SV=4	2	535.752	0.9996	QSVTYACNK	10110.6	6965.48	23443.2	17483.3	23116.6
P04843	RPN1	Dolichyl-diphosphooligosaccharide--protein glycosyltransferase subunit 1 OS=Homo sapiens GN=RPN1 PE=1 SV=1	2	506.236	0.9996	DTYIENEK	4026.21	10112.9	5146.68	3992.16	5517.15
P16422	EPCAM	Epithelial cell adhesion molecule OS=Homo sapiens GN=EPCAM PE=1 SV=2	2	660.829	0.9996	LAVNCFVNNNR	7122.79	3834.67	11093.9	57859.8	25890.2
Q06481	APLP2	Amyloid-like protein 2 OS=Homo sapiens GN=APLP2 PE=1 SV=2	2	550.752	0.9996	FIYGGCGGNR	8992.48	7780.34	10559.7	9978.17	7303
P30533	AMRP	Alpha-2-macroglobulin receptor-associated protein OS=Homo sapiens GN=LRPAP1 PE=1 SV=1	2	463.247	0.9996	HLQDLSGR	8732.25	9197.69	6391.36	10581.7	4194.55
P30533	AMRP	Alpha-2-macroglobulin receptor-associated protein OS=Homo sapiens GN=LRPAP1 PE=1 SV=1	2	505.288	0.9996	LAELHADLK	6814.65	6466.23	3675.16	5642.04	1369.3
P27797	CALR	Calreticulin OS=Homo sapiens GN=CALR PE=1 SV=1	2	705.82	0.9996	EQFLDGDGWTSR	386.588	367.972	45243.1	625.772	964.681
P27487	DPP4	Dipeptidyl peptidase 4 OS=Homo sapiens GN=DPP4 PE=1 SV=2	3	648.99	0.9996	CSGPGLPLYTLHSSVNDK	4828.25	78.2676	45592.7	8125.02	694.963
Q07065	CKAP4	Cytoskeleton-associated protein 4 OS=Homo sapiens GN=CKAP4 PE=1 SV=2	3	394.524	0.9996	GAHPSGGADDVAK	96.7811	60.6976	377.34	254.76	467.832
O95994	AGR2	Anterior gradient protein 2 homolog OS=Homo sapiens GN=AGR2 PE=1 SV=1	2	603.33	0.9996	VFAENKEIQK	21049.9	28509.3	23522.6	25308.2	14291.3
O95994	AGR2	Anterior gradient protein 2 homolog OS=Homo sapiens GN=AGR2 PE=1 SV=1	2	639.351	0.9996	IMFVDPSLTVR	2969.92	13250.9	5764.5	748.55	3508.82
Q8WTV0	SCRB1	Scavenger receptor class B member 1 OS=Homo sapiens GN=SCARB1 PE=1 SV=1	2	677.844	0.9996	ESGVFEGIPTYR	2279.99	3005.71	9221.73	13812.9	104450
P11169	GTR3	Solute carrier family 2, facilitated glucose transporter member 3 OS=Homo sapiens GN=SLC2A3 PE=2 SV=1	2	509.294	0.9996	SVEMLILGR	743.828	5102.07	1284.03	536.158	2588.52
P05090	APOD	Apolipoprotein D OS=Homo sapiens GN=APOD PE=1 SV=1	2	436.254	0.9996	VLNQELR	8817.42	4909.62	21948.9	16947.1	22906.5
O95573	ACSL3	Long-chain-fatty-acid--CoA ligase 3 OS=Homo sapiens GN=ACSL3 PE=1 SV=3	2	994.508	0.9996	LSPEPWTPETGLVTDAFK	7892.51	21797	807.023	3385.92	9132.5
Q9UBM7	DHCR7	7-dehydrocholesterol reductase OS=Homo sapiens GN=DHCR7 PE=1 SV=1	2	488.739	0.9996	SLDGVTNDR	7591.85	14210.2	8302	7108.04	9968.82
Q02818	NUCB1	Nucleobindin-1 OS=Homo sapiens GN=NUCB1 PE=1 SV=4	2	482.741	0.9996	FEEELAAR	3328.15	2466.21	3478.24	2615.59	3953.36
P07942	LAMB1	Laminin subunit beta-1 OS=Homo sapiens GN=LAMB1 PE=1 SV=2	3	888.39	0.9996	GIETPQCDQSTGQCVCVEGVEGPR	14594.8	65.2301	384.999	14.2717	719.151
Q92504	S39A7	Zinc transporter SLC39A7 OS=Homo sapiens GN=SLC39A7 PE=1 SV=2	4	406.958	0.9996	DGPVRPQNAEEEKR	18.5237	30.6969	538.89	664.165	132520
P08183	MDR1	Multidrug resistance protein 1 OS=Homo sapiens GN=ABCB1 PE=1 SV=3	2	522.806	0.9996	STVVQLLER	1816.37	4129.49	4584.7	2351.91	1222.2
P02751	FINC	Fibronectin OS=Homo sapiens GN=FN1 PE=1 SV=4	3	723.362	0.9995	ITYGETGGNSPVQEFTVPGSK	5538.41	12463.5	2643.87	25797.4	23885.1
P02787	TRFE	Serotransferrin OS=Homo sapiens GN=TF PE=1 SV=3	4	503.511	0.9995	SETKDLLFRDDTVCLAK	878.887	51670.6	2489.81	4901.65	31757.1
P00505	AATM	Aspartate aminotransferase, mitochondrial OS=Homo sapiens GN=GOT2 PE=1 SV=3	3	610.003	0.9995	ILIRPMYSNPPLNGAR	2507.99	58.8042	2674.91	556.106	64046.1
P07355	ANXA2	Annexin A2 OS=Homo sapiens GN=ANXA2 PE=1 SV=2	3	689.002	0.9995	RAEDGSVIDYELIDQDAR	14115.9	5083.63	692.233	2327.95	3881.27
P08174	DAF	Complement decay-accelerating factor OS=Homo sapiens GN=CD55 PE=1 SV=4	3	979.476	0.9995	QPYITQNYFPVGTVVEYECRPGYR	46436	1250.16	334.531	1359.88	328.804
P04843	RPN1	Dolichyl-diphosphooligosaccharide--protein glycosyltransferase subunit 1 OS=Homo sapiens GN=RPN1 PE=1 SV=1	2	490.794	0.9995	LPVALDPGAK	6483.53	14037.6	94.0318	8133.06	14.4162
Q07157	ZO1	Tight junction protein ZO-1 OS=Homo sapiens GN=TJP1 PE=1 SV=3	2	545.28	0.9995	EISQDSLAAR	5217.35	9323.24	8415.45	5339.51	8190.52
P21912	SDHB	Succinate dehydrogenase [ubiquinone] iron-sulfur subunit, mitochondrial OS=Homo sapiens GN=SDHB PE=1 SV=3	2	699.368	0.9995	YLGPAVLMQAYR	3204.02	2929.08	3550.58	36885.4	4894.54
P07602	SAP	Prosaposin OS=Homo sapiens GN=PSAP PE=1 SV=2	2	824.376	0.9995	SDVYCEVCEFLVK	7331.82	263.287	2229.89	14990.5	7034.11
P67809	YBOX1	Nuclease-sensitive element-binding protein 1 OS=Homo sapiens GN=YBX1 PE=1 SV=3	2	470.736	0.9995	NGYGFINR	5441.82	3764.42	3223.41	5055.73	1367.66
Q14697	GANAB	Neutral alpha-glucosidase AB OS=Homo sapiens GN=GANAB PE=1 SV=3	3	555.362	0.9995	VVIIGAGKPAAVVLQTK	54.1086	13.1748	29370.2	0	0
Q8TDB8	GTR14	Solute carrier family 2, facilitated glucose transporter member 14 OS=Homo sapiens GN=SLC2A14 PE=2 SV=1	3	386.849	0.9995	AFEGQAHGADR	0	0	84.2463	21.0904	81820.3
Q8TDB8	GTR14	Solute carrier family 2, facilitated glucose transporter member 14 OS=Homo sapiens GN=SLC2A14 PE=2 SV=1	3	784.7	0.9995	LWGTQDVSQDIQEMKDESAR	2847.04	1218.27	25541.4	14884.3	310670
Q8WTV0	SCRB1	Scavenger receptor class B member 1 OS=Homo sapiens GN=SCARB1 PE=1 SV=1	2	677.838	0.9995	ESGVFEGIPTYR	2931.81	3488.09	71646	3634.48	3832.62
P10606	COX5B	Cytochrome c oxidase subunit 5B, mitochondrial OS=Homo sapiens GN=COX5B PE=1 SV=2	3	438.92	0.9995	KGLDPYNVLAPK	0	0	0.756484	0.0952665	22528.7
Q9UJS0	CMC2	Calcium-binding mitochondrial carrier protein Aralar2 OS=Homo sapiens GN=SLC25A13 PE=1 SV=2	3	702.394	0.9995	FGLGSVAGAVGATAVYPIDLVK	655.92	4871.39	587.166	203.663	3260.22
P02751	FINC	Fibronectin OS=Homo sapiens GN=FN1 PE=1 SV=4	2	666.364	0.9994	ESKPLTAQQTTK	5567.11	5862.5	8503.31	5628.13	7708.6
P02751	FINC	Fibronectin OS=Homo sapiens GN=FN1 PE=1 SV=4	2	436.742	0.9994	VFAVSHGR	7371.17	8804.37	7555.05	7897.68	6701.89
P02787	TRFE	Serotransferrin OS=Homo sapiens GN=TF PE=1 SV=3	2	879.463	0.9994	EDPQTFYYAVAVVKK	164.106	41231	963.111	904.986	33950.9
P02787	TRFE	Serotransferrin OS=Homo sapiens GN=TF PE=1 SV=3	4	423.219	0.9994	DCHLAQVPSHTVVAR	60968.8	31073.9	135.529	3715.4	71.9544
Q9P2E9	RRBP1	Ribosome-binding protein 1 OS=Homo sapiens GN=RRBP1 PE=1 SV=4	2	572.802	0.9994	EQEITAVQAR	20719.6	34134.4	28251.3	25152.4	25856.5
P07237	PDIA1	Protein disulfide-isomerase OS=Homo sapiens GN=P4HB PE=1 SV=3	2	611.817	0.9994	LITLEEEMTK	2060.55	14852.1	23793.1	36609.3	168518
P07237	PDIA1	Protein disulfide-isomerase OS=Homo sapiens GN=P4HB PE=1 SV=3	3	577.309	0.9994	LGETYKDHENIVIAK	95.5304	2867.29	1980.89	26321.6	6445.37
P14625	ENPL	Endoplasmin OS=Homo sapiens GN=HSP90B1 PE=1 SV=1	2	594.344	0.9994	SILFVPTSAPR	33244.1	904.468	1758.06	1566.29	594.816
Q9Y4L1	HYOU1	Hypoxia up-regulated protein 1 OS=Homo sapiens GN=HYOU1 PE=1 SV=1	3	575.012	0.9994	VAIVKPGVPMEIVLNK	100.93	3.70135	59555.5	137.242	0
Q9Y4L1	HYOU1	Hypoxia up-regulated protein 1 OS=Homo sapiens GN=HYOU1 PE=1 SV=1	3	781.379	0.9994	VESVFETLVEDSAEEESTLTK	4498.39	149.724	2884.6	351.773	10.8975
Q12864	CAD17	Cadherin-17 OS=Homo sapiens GN=CDH17 PE=2 SV=3	2	509.777	0.9994	VSEDVAIGTK	4278.89	6856.32	2901.16	3731.04	19313.1
P30533	AMRP	Alpha-2-macroglobulin receptor-associated protein OS=Homo sapiens GN=LRPAP1 PE=1 SV=1	2	505.239	0.9994	RESGEEFR	5052.03	3795.96	3745.15	3581.78	2044.2
P14314	GLU2B	Glucosidase 2 subunit beta OS=Homo sapiens GN=PRKCSH PE=1 SV=2	2	579.813	0.9994	LWEEQLAAAK	7056.33	591.82	4504.11	42109.6	10821.4
P14314	GLU2B	Glucosidase 2 subunit beta OS=Homo sapiens GN=PRKCSH PE=1 SV=2	2	618.304	0.9994	SLEDQVEMLR	2514.07	16969.9	1282.23	144.82	12215.8
O00592	PODXL	Podocalyxin OS=Homo sapiens GN=PODXL PE=1 SV=2	2	642.881	0.9994	LASVPGSQTVVVK	10176.6	8599.61	12606	5514.65	215165
O43852	CALU	Calumenin OS=Homo sapiens GN=CALU PE=1 SV=2	3	527.258	0.9994	TFDQLTPEESKER	1492.26	152.641	3681.2	3206.13	122310
P11169	GTR3	Solute carrier family 2, facilitated glucose transporter member 3 OS=Homo sapiens GN=SLC2A3 PE=2 SV=1	2	517.291	0.9994	SVEMLILGR	55.8415	16.7535	943.406	62.6061	39966.1
Q92504	S39A7	Zinc transporter SLC39A7 OS=Homo sapiens GN=SLC39A7 PE=1 SV=2	3	490.24	0.9994	DGPVRPQNAEEEK	42519.9	14685.4	26402.2	27475.4	25162.5
Q92542	NICA	Nicastrin OS=Homo sapiens GN=NCSTN PE=1 SV=2	2	520.318	0.9994	SGAGVPAVILR	5796	4862.91	123.615	46.7475	178.139
P02751	FINC	Fibronectin OS=Homo sapiens GN=FN1 PE=1 SV=4	2	555.776	0.9993	STTPDITGYR	35865.9	42056.3	7362.97	38149	980.861
P02751	FINC	Fibronectin OS=Homo sapiens GN=FN1 PE=1 SV=4	3	826.741	0.9993	TEIDKPSQMQVTDVQDNSISVK	10340.7	4223.41	1961.25	8954.3	97295.5
P02787	TRFE	Serotransferrin OS=Homo sapiens GN=TF PE=1 SV=3	4	807.88	0.9993	LKCDEWSVNSVGKIECVSAETTEDCIAK	412168	6786.38	1152.76	20321.4	2237.31
Q15084	PDIA6	Protein disulfide-isomerase A6 OS=Homo sapiens GN=PDIA6 PE=1 SV=1	3	462.926	0.9993	TGEAIVDAALSALR	18650.7	0	3395.1	974.344	612.285
Q92896	GSLG1	Golgi apparatus protein 1 OS=Homo sapiens GN=GLG1 PE=1 SV=2	2	501.246	0.9993	CNVENLPR	4228.61	6314.89	6427.65	4736	4155.57
P08174	DAF	Complement decay-accelerating factor OS=Homo sapiens GN=CD55 PE=1 SV=4	2	700.852	0.9993	TSFPEDTVITYK	68119.6	13845.8	6286.24	15652.2	6316.69
P62937	PPIA	Peptidyl-prolyl cis-trans isomerase A OS=Homo sapiens GN=PPIA PE=1 SV=2	2	528.275	0.9993	VSFELFADK	1496.59	64.3899	53635.3	73.0361	3068.37
P27797	CALR	Calreticulin OS=Homo sapiens GN=CALR PE=1 SV=1	2	496.739	0.9993	QIDNPDYK	31559.2	16073.9	40935.9	24940.8	34064.7
P05556	ITB1	Integrin beta-1 OS=Homo sapiens GN=ITGB1 PE=1 SV=2	2	570.763	0.9993	DNTNEIYSGK	8580.2	7341.28	12248.4	7671.57	15240.3
P07602	SAP	Prosaposin OS=Homo sapiens GN=PSAP PE=1 SV=2	2	536.216	0.9993	DGGFCEVCK	2797.37	1808.27	7946.92	4627.55	7995.39
P17931	LEG3	Galectin-3 OS=Homo sapiens GN=LGALS3 PE=1 SV=5	3	442.247	0.9993	IQVLVEPDHFK	28233.2	466.752	4594.59	30748.5	1517.94
P11169	GTR3	Solute carrier family 2, facilitated glucose transporter member 3 OS=Homo sapiens GN=SLC2A3 PE=2 SV=1	3	785.368	0.9993	SGKDGVMEMNSIEPAKETTTNV	0	30620.5	31.1196	0	0.00394286
P08574	CY1	Cytochrome c1, heme protein, mitochondrial OS=Homo sapiens GN=CYC1 PE=1 SV=3	2	835.948	0.9993	AANNGALPPDLSYIVR	0	881.76	28917	32.6656	79.5349
Q15758	AAAT	Neutral amino acid transporter B(0) OS=Homo sapiens GN=SLC1A5 PE=1 SV=2	2	572.319	0.9993	STEPELIQVK	82167.9	8107.07	121320	14278	324028
Q02818	NUCB1	Nucleobindin-1 OS=Homo sapiens GN=NUCB1 PE=1 SV=4	2	536.786	0.9993	LQAANAEDIK	5494.67	4296.37	10310.9	7033.4	10750.3
P07858	CATB	Cathepsin B OS=Homo sapiens GN=CTSB PE=1 SV=3	2	438.733	0.9993	LPASFDAR	12008.8	7823.51	6426.28	7322.67	4503.76
Q14108	SCRB2	Lysosome membrane protein 2 OS=Homo sapiens GN=SCARB2 PE=1 SV=2	2	606.799	0.9993	VEEVGPYTYR	5879.99	2104.27	83429.1	3487.98	102628
P02751	FINC	Fibronectin OS=Homo sapiens GN=FN1 PE=1 SV=4	2	675.347	0.9992	WLPSSSPVTGYR	4257.9	4256.01	51505.3	2347.49	5805.38
P02787	TRFE	Serotransferrin OS=Homo sapiens GN=TF PE=1 SV=3	2	461.222	0.9992	DDTVCLAK	263413	103738	8015.56	8199.24	8136.37
P02787	TRFE	Serotransferrin OS=Homo sapiens GN=TF PE=1 SV=3	3	459.906	0.9992	KSASDLTWDNLK	24227.5	1308.53	3818.35	1008.15	917.397
Q9P2E9	RRBP1	Ribosome-binding protein 1 OS=Homo sapiens GN=RRBP1 PE=1 SV=4	3	487.272	0.9992	LKELESQVSGLEK	4893.42	16984.3	207.437	743.41	591.474
P07237	PDIA1	Protein disulfide-isomerase OS=Homo sapiens GN=P4HB PE=1 SV=3	2	607.273	0.9992	NFEDVAFDEK	26524.6	13654.6	119.876	617.232	162.588
P05023	AT1A1	Sodium\potassium-transporting ATPase subunit alpha-1 OS=Homo sapiens GN=ATP1A1 PE=1 SV=1	2	792.943	0.9992	AVFQANQENLPILK	808.105	20860	76.8079	6439.15	433.612
P02649	APOE	Apolipoprotein E OS=Homo sapiens GN=APOE PE=1 SV=1	2	557.797	0.9992	LEEQAQQIR	2184.41	495.906	15412.6	9923.24	14360.7
Q06481	APLP2	Amyloid-like protein 2 OS=Homo sapiens GN=APLP2 PE=1 SV=2	3	601.992	0.9992	CLVGEFVSDVLLVPEK	34.5312	2144.01	678.493	36.6164	136.55
P30533	AMRP	Alpha-2-macroglobulin receptor-associated protein OS=Homo sapiens GN=LRPAP1 PE=1 SV=1	2	442.783	0.9992	NLNVILAK	18223.5	11059	7016.47	12936.6	1937.24
Q92544	TM9S4	Transmembrane 9 superfamily member 4 OS=Homo sapiens GN=TM9SF4 PE=1 SV=2	2	818.425	0.9992	IVNTPFQVLMNSEK	1357.17	14308.1	4152.98	1730.56	1415.51
P05090	APOD	Apolipoprotein D OS=Homo sapiens GN=APOD PE=1 SV=1	2	829.401	0.9992	CPNPPVQENFDVNK	16391.4	195400	2128.21	7096.25	319.946
Q15758	AAAT	Neutral amino acid transporter B(0) OS=Homo sapiens GN=SLC1A5 PE=1 SV=2	2	1079.59	0.9992	SELPLDPLPVPTEEGNPLLK	1238.45	479.109	74882.3	943.957	0
P21796	VDAC1	Voltage-dependent anion-selective channel protein 1 OS=Homo sapiens GN=VDAC1 PE=1 SV=2	2	515.812	0.9992	LTLSALLDGK	292.384	3499.71	6972.19	886.372	4664.1
P02751	FINC	Fibronectin OS=Homo sapiens GN=FN1 PE=1 SV=4	2	611.266	0.9991	TFYSCTTEGR	177.492	1228.37	22890.2	446.193	538.624
P02751	FINC	Fibronectin OS=Homo sapiens GN=FN1 PE=1 SV=4	2	532.773	0.9991	VGDTYERPK	10092.2	10100.3	13289.6	11950.5	9130.33
P02787	TRFE	Serotransferrin OS=Homo sapiens GN=TF PE=1 SV=3	3	375.863	0.9991	KASYLDCIR	71481.6	41443	671.83	213.323	272.463
Q9P2E9	RRBP1	Ribosome-binding protein 1 OS=Homo sapiens GN=RRBP1 PE=1 SV=4	2	515.781	0.9991	QSDELALVR	17192.3	18922	10608.3	9858.39	546.854
P14625	ENPL	Endoplasmin OS=Homo sapiens GN=HSP90B1 PE=1 SV=1	2	491.746	0.9991	SGTSEFLNK	17344.9	19523.2	22275.5	21823.2	21830.3
Q12864	CAD17	Cadherin-17 OS=Homo sapiens GN=CDH17 PE=2 SV=3	2	650.351	0.9991	AENPEPLVFGVK	2119.59	4213.01	9356.05	29479.2	12871.7
Q06481	APLP2	Amyloid-like protein 2 OS=Homo sapiens GN=APLP2 PE=1 SV=2	3	601.99	0.9991	CLVGEFVSDVLLVPEK	2620.37	71.377	0	45.8768	135.705
P05556	ITB1	Integrin beta-1 OS=Homo sapiens GN=ITGB1 PE=1 SV=2	3	615.65	0.9991	DKLPQPVQPDPVSHCK	17540.2	16997.2	1321.64	289.472	292.669
P07602	SAP	Prosaposin OS=Homo sapiens GN=PSAP PE=1 SV=2	2	824.407	0.9991	SDVYCEVCEFLVK	7182.44	2276.03	1436.07	1157.66	33009.6
Q14697	GANAB	Neutral alpha-glucosidase AB OS=Homo sapiens GN=GANAB PE=1 SV=3	2	437.237	0.9991	LDLLEDR	6482.65	6440.28	3411.22	3944.67	3212.29
P17931	LEG3	Galectin-3 OS=Homo sapiens GN=LGALS3 PE=1 SV=5	3	552.989	0.9991	MLITILGTVKPNANR	3518.45	19356.1	227.192	119.822	44.4463
P12235	ADT1	ADP\ATP translocase 1 OS=Homo sapiens GN=SLC25A4 PE=1 SV=4	2	568.844	0.9991	LLLQVQHASK	4030.59	14788.7	1833.61	3495.05	217.417
P07339	CATD	Cathepsin D OS=Homo sapiens GN=CTSD PE=1 SV=1	2	410.72	0.9991	VGFAEAAR	5825.6	2864.05	6099.28	5304.79	5865.49
Q92504	S39A7	Zinc transporter SLC39A7 OS=Homo sapiens GN=SLC39A7 PE=1 SV=2	4	406.958	0.9991	DGPVRPQNAEEEKR	418.569	113.998	72003.9	1223.82	769.776
P02751	FINC	Fibronectin OS=Homo sapiens GN=FN1 PE=1 SV=4	2	679.35	0.999	IAWESPQGQVSR	23644.5	1415.49	3361.6	18373.5	58582.7
P07237	PDIA1	Protein disulfide-isomerase OS=Homo sapiens GN=P4HB PE=1 SV=3	2	464.767	0.999	VHSFPTLK	16449.1	11328.1	6441.25	9237.86	1551.25
Q14247	SRC8	Src substrate cortactin OS=Homo sapiens GN=CTTN PE=1 SV=2	2	453.738	0.999	ANFENLAK	19924.1	13502.8	16091.1	17067.4	12851
Q14247	SRC8	Src substrate cortactin OS=Homo sapiens GN=CTTN PE=1 SV=2	2	425.707	0.999	FGVEQDR	7029.59	4275.36	6731.97	4749.84	5681.29
P00505	AATM	Aspartate aminotransferase, mitochondrial OS=Homo sapiens GN=GOT2 PE=1 SV=3	4	588.824	0.999	ISVAGVTSSNVGYLAHAIHQVTK	132.77	17007	7183.8	54.6017	1395.76
P07355	ANXA2	Annexin A2 OS=Homo sapiens GN=ANXA2 PE=1 SV=2	3	514.955	0.999	GVDEVTIVNILTNR	154.969	4538.54	832.139	3173.59	5536.63
P62937	PPIA	Peptidyl-prolyl cis-trans isomerase A OS=Homo sapiens GN=PPIA PE=1 SV=2	2	560.272	0.999	ITIADCGQLE	2149.01	3506.84	33108.6	3413.67	1395.32
P62937	PPIA	Peptidyl-prolyl cis-trans isomerase A OS=Homo sapiens GN=PPIA PE=1 SV=2	2	647.794	0.999	EGMNIVEAMER	665.7	1331.22	30409.8	433.62	2010.89
P14314	GLU2B	Glucosidase 2 subunit beta OS=Homo sapiens GN=PRKCSH PE=1 SV=2	2	610.31	0.999	SLEDQVEMLR	709.278	601.596	1657.34	4860.86	63510.4
Q13162	PRDX4	Peroxiredoxin-4 OS=Homo sapiens GN=PRDX4 PE=1 SV=1	2	460.759	0.999	GLFIIDDK	1538.45	9592.85	941.883	814.723	279.416
Q13162	PRDX4	Peroxiredoxin-4 OS=Homo sapiens GN=PRDX4 PE=1 SV=1	3	949.139	0.999	SINTEVVACSVDSQFTHLAWINTPR	4692.47	6459.76	3986.34	1770.42	895.523
P11169	GTR3	Solute carrier family 2, facilitated glucose transporter member 3 OS=Homo sapiens GN=SLC2A3 PE=2 SV=1	2	1049.47	0.999	DGVMEMNSIEPAKETTTNV	10942.9	68797.9	0	0	0
P20674	COX5A	Cytochrome c oxidase subunit 5A, mitochondrial OS=Homo sapiens GN=COX5A PE=1 SV=2	2	511.768	0.999	LNDFASTVR	652.249	184.178	28266.6	230.202	2702.25
Q86X29	LSR	Lipolysis-stimulated lipoprotein receptor OS=Homo sapiens GN=LSR PE=1 SV=4	2	490.228	0.999	SGDLPYDGR	1771.83	1827.93	2543.69	1595.58	2714.08
P02751	FINC	Fibronectin OS=Homo sapiens GN=FN1 PE=1 SV=4	3	898.131	0.9989	FTQVTPTSLSAQWTPPNVQLTGYR	3287.2	2294.21	75478.1	1759.39	1295.61
P02751	FINC	Fibronectin OS=Homo sapiens GN=FN1 PE=1 SV=4	3	551.268	0.9989	LLCQCLGFGSGHFR	907.772	12729.1	286.124	1716.38	379.397
P02751	FINC	Fibronectin OS=Homo sapiens GN=FN1 PE=1 SV=4	3	844.796	0.9989	NSITLTNLTPGTEYVVSIVALNGR	13874.7	565.199	890.671	3515.1	1792.22
P07237	PDIA1	Protein disulfide-isomerase OS=Homo sapiens GN=P4HB PE=1 SV=3	3	594.285	0.9989	VDATEESDLAQQYGVR	400.196	15430.5	236.795	4112.82	1748.95
P14625	ENPL	Endoplasmin OS=Homo sapiens GN=HSP90B1 PE=1 SV=1	2	482.298	0.9989	LIINSLYK	41.2546	12.7134	37836.8	264.565	1042.08
P62937	PPIA	Peptidyl-prolyl cis-trans isomerase A OS=Homo sapiens GN=PPIA PE=1 SV=2	3	502.588	0.9989	VKEGMNIVEAMER	129.298	2.86068	16069.3	78.3325	5816.63
P27487	DPP4	Dipeptidyl peptidase 4 OS=Homo sapiens GN=DPP4 PE=1 SV=2	2	484.259	0.9989	IQLSDYTK	10359.2	7887.54	3763.11	6718.81	78.7148
Q99470	SDF2	Stromal cell-derived factor 2 OS=Homo sapiens GN=SDF2 PE=1 SV=2	2	439.213	0.9989	AEAHHAEL	1986.55	1511.92	2026.17	2177.02	1331.4
Q14108	SCRB2	Lysosome membrane protein 2 OS=Homo sapiens GN=SCARB2 PE=1 SV=2	2	606.8	0.9989	VEEVGPYTYR	14982.3	11984.5	117.357	6205.92	406.197
P50454	SERPH	Serpin H1 OS=Homo sapiens GN=SERPINH1 PE=1 SV=2	3	426.914	0.9988	LQIVEMPLAHK	131.757	7.90328	0.673322	3.01682	33094.6
P07355	ANXA2	Annexin A2 OS=Homo sapiens GN=ANXA2 PE=1 SV=2	2	381.234	0.9988	LMVALAK	3466.49	9403.64	8315.55	7229.24	3440.07
P08195	4F2	4F2 cell-surface antigen heavy chain OS=Homo sapiens GN=SLC3A2 PE=1 SV=3	4	895.695	0.9988	NQKDDVAQTDLLQIDPNFGSKEDFDSLLQSAK	1827.87	35450.6	3503.42	2496.91	1110.09
P08174	DAF	Complement decay-accelerating factor OS=Homo sapiens GN=CD55 PE=1 SV=4	3	453.584	0.9988	IPGEKDSVICLK	15507.8	18198.1	11.107	45.2734	30.2796
Q8WTV0	SCRB1	Scavenger receptor class B member 1 OS=Homo sapiens GN=SCARB1 PE=1 SV=1	2	491.75	0.9988	TFQFQPSK	728.437	697.211	15466.1	1160.78	17192.7
P12830	CADH1	Cadherin-1 OS=Homo sapiens GN=CDH1 PE=1 SV=3	3	772.379	0.9988	YLPRPANPDEIGNFIDENLK	8388.67	73095.4	10692.1	43004.6	11718.8
P42167	LAP2B	Lamina-associated polypeptide 2, isoforms beta\gamma OS=Homo sapiens GN=TMPO PE=1 SV=2	2	665.861	0.9988	YGVNPGPIVGTTR	18452.3	22659.5	88.8973	747.611	155.668
P27824	CALX	Calnexin OS=Homo sapiens GN=CANX PE=1 SV=2	3	908.442	0.9987	TPELNLDQFHDKTPYTIMFGPDK	2836.31	2203.33	2578.66	73902.4	8539.26
Q12864	CAD17	Cadherin-17 OS=Homo sapiens GN=CDH17 PE=2 SV=3	2	536.768	0.9987	EGSQELNPAK	17323.4	9525.69	33042.8	21445.1	36690.7
Q14315	FLNC	Filamin-C OS=Homo sapiens GN=FLNC PE=1 SV=3	3	775.38	0.9987	VEESTQVGGDPFPAVFGDFLGR	161.05	3576.91	5141.95	643.049	1138.8
P27487	DPP4	Dipeptidyl peptidase 4 OS=Homo sapiens GN=DPP4 PE=1 SV=2	2	491.744	0.9987	MGFVDNKR	2251.44	2084.68	1600.08	1615.69	944.319
O95573	ACSL3	Long-chain-fatty-acid--CoA ligase 3 OS=Homo sapiens GN=ACSL3 PE=1 SV=3	2	800.38	0.9987	EVLNEEDEVQPNGK	2579.88	7131.62	0	1588.82	0
Q8TCT9	HM13	Minor histocompatibility antigen H13 OS=Homo sapiens GN=HM13 PE=1 SV=1	2	661.31	0.9987	NASDMPETITSR	2176.25	685.947	5200.82	6139.78	20922.1
P02787	TRFE	Serotransferrin OS=Homo sapiens GN=TF PE=1 SV=3	2	414.207	0.9986	NPDPWAK	279744	163858	374.171	521.814	717.511
P16422	EPCAM	Epithelial cell adhesion molecule OS=Homo sapiens GN=EPCAM PE=1 SV=2	2	562.278	0.9986	APEFSMQGLK	8605.63	7598.07	10469.9	11361.8	522.941
Q14315	FLNC	Filamin-C OS=Homo sapiens GN=FLNC PE=1 SV=3	2	469.26	0.9986	LGSFGSITR	1673.4	4235.31	48.942	1518.2	45.3521
P11169	GTR3	Solute carrier family 2, facilitated glucose transporter member 3 OS=Homo sapiens GN=SLC2A3 PE=2 SV=1	3	785.369	0.9986	SGKDGVMEMNSIEPAKETTTNV	11905.8	5887.14	939.504	107762	6023.35
P08574	CY1	Cytochrome c1, heme protein, mitochondrial OS=Homo sapiens GN=CYC1 PE=1 SV=3	2	835.947	0.9986	AANNGALPPDLSYIVR	458.627	2976.31	62769.5	3691.59	5838.03
P05023	AT1A1	Sodium\potassium-transporting ATPase subunit alpha-1 OS=Homo sapiens GN=ATP1A1 PE=1 SV=1	2	406.202	0.9985	YGTDLSR	4360.04	6280.32	5837.03	4760.46	5602.36
P08195	4F2	4F2 cell-surface antigen heavy chain OS=Homo sapiens GN=SLC3A2 PE=1 SV=3	2	602.341	0.9985	VILDLTPNYR	1271.05	4550.74	83053.3	6340.75	241032
Q96AG4	LRC59	Leucine-rich repeat-containing protein 59 OS=Homo sapiens GN=LRRC59 PE=1 SV=1	3	511.965	0.9985	LVNLQHLDLLNNK	1587.94	18.5842	81.066	17273.2	18.3128
P46977	STT3A	Dolichyl-diphosphooligosaccharide--protein glycosyltransferase subunit STT3A OS=Homo sapiens GN=STT3A PE=1 SV=2	2	552.276	0.9985	FLAEEGFYK	240.233	23206.5	3634.6	2218.07	1588.8
Q12907	LMAN2	Vesicular integral-membrane protein VIP36 OS=Homo sapiens GN=LMAN2 PE=1 SV=1	2	524.267	0.9985	NCIDITGVR	10233.1	9555.93	3504.35	10741.1	3851.11
Q99805	TM9S2	Transmembrane 9 superfamily member 2 OS=Homo sapiens GN=TM9SF2 PE=1 SV=1	2	364.707	0.9985	TNQIPR	568.628	2365.12	1080.22	1074.78	1876.63
P02649	APOE	Apolipoprotein E OS=Homo sapiens GN=APOE PE=1 SV=1	2	611.765	0.9984	LGADMEDVCGR	25.3095	1321.09	268.906	104.498	18906.4
Q92896	GSLG1	Golgi apparatus protein 1 OS=Homo sapiens GN=GLG1 PE=1 SV=2	3	592.963	0.9984	STITEIKECADEPVGK	409.961	5.87081	10833.9	314.819	1417.96
P17931	LEG3	Galectin-3 OS=Homo sapiens GN=LGALS3 PE=1 SV=5	2	431.744	0.9984	IALDFQR	292.378	20.8454	94.4422	10257.8	1720.3
P07339	CATD	Cathepsin D OS=Homo sapiens GN=CTSD PE=1 SV=1	2	521.83	0.9984	VSTLPAITLK	10508.5	21.5635	0	0	92.2979
P02649	APOE	Apolipoprotein E OS=Homo sapiens GN=APOE PE=1 SV=1	2	624.293	0.9983	QQTEWQSGQR	1918.9	1387.17	15897.5	10318.6	14971.4
P04843	RPN1	Dolichyl-diphosphooligosaccharide--protein glycosyltransferase subunit 1 OS=Homo sapiens GN=RPN1 PE=1 SV=1	2	635.803	0.9983	DVPAYSQDTFK	9417.47	37455.1	1518.6	1703.48	1190.07
P05556	ITB1	Integrin beta-1 OS=Homo sapiens GN=ITGB1 PE=1 SV=2	2	548.799	0.9983	LSEGVTISYK	1779.64	1053.49	9051.89	8446.19	30005.3
Q96AG4	LRC59	Leucine-rich repeat-containing protein 59 OS=Homo sapiens GN=LRRC59 PE=1 SV=1	2	572.815	0.9983	LQQLPADFGR	88161.5	53191.2	4919.42	4234.95	7800.77
Q8TDB8	GTR14	Solute carrier family 2, facilitated glucose transporter member 14 OS=Homo sapiens GN=SLC2A14 PE=2 SV=1	3	386.849	0.9983	AFEGQAHGADR	33755.9	30325.7	31227.6	40555.1	26865.7
P45880	VDAC2	Voltage-dependent anion-selective channel protein 2 OS=Homo sapiens GN=VDAC2 PE=1 SV=2	2	508.804	0.9983	LTLSALVDGK	590.695	6968.52	351.709	832.013	117.227
O00299	CLIC1	Chloride intracellular channel protein 1 OS=Homo sapiens GN=CLIC1 PE=1 SV=4	2	479.244	0.9983	YLSNAYAR	7760.18	7558.14	7937.61	6297.41	6877.72
P02787	TRFE	Serotransferrin OS=Homo sapiens GN=TF PE=1 SV=3	3	720.346	0.9982	IMNGEADAMSLDGGFVYIAGK	3064.99	7560.91	1018.01	4947.75	531.915
P08195	4F2	4F2 cell-surface antigen heavy chain OS=Homo sapiens GN=SLC3A2 PE=1 SV=3	2	626.802	0.9982	EDFDSLLQSAK	1813.05	1252.4	41818	3430.1	11810.4
P10606	COX5B	Cytochrome c oxidase subunit 5B, mitochondrial OS=Homo sapiens GN=COX5B PE=1 SV=2	3	438.92	0.9982	KGLDPYNVLAPK	0	0.309903	16178	0	128.515
Q9Y4L1	HYOU1	Hypoxia up-regulated protein 1 OS=Homo sapiens GN=HYOU1 PE=1 SV=1	2	524.284	0.9981	LAGLFNEQR	11051.5	12830	2790.64	18511.9	796.122
Q8WTV0	SCRB1	Scavenger receptor class B member 1 OS=Homo sapiens GN=SCARB1 PE=1 SV=1	2	506.28	0.9981	LQLSLYMK	856.387	1116.72	41879.6	5874.75	7310.47
Q16891	MIC60	MICOS complex subunit MIC60 OS=Homo sapiens GN=IMMT PE=1 SV=1	2	558.301	0.9981	AVDEAADALLK	4198.69	4646.26	270.185	182.844	1422.32
P50454	SERPH	Serpin H1 OS=Homo sapiens GN=SERPINH1 PE=1 SV=2	2	399.759	0.998	AVAISLPK	13.4892	17.2287	1417.82	0.0024073	78342.9
P08574	CY1	Cytochrome c1, heme protein, mitochondrial OS=Homo sapiens GN=CYC1 PE=1 SV=3	2	835.949	0.998	AANNGALPPDLSYIVR	173.356	581.249	271.9	68757.5	638.847
P02751	FINC	Fibronectin OS=Homo sapiens GN=FN1 PE=1 SV=4	3	723.357	0.9979	ITYGETGGNSPVQEFTVPGSK	8878.7	950.143	653.867	958.34	49430.7
P07237	PDIA1	Protein disulfide-isomerase OS=Homo sapiens GN=P4HB PE=1 SV=3	2	579.796	0.9979	SNFAEALAAHK	128211	34754.1	243.418	2309.89	3090.44
Q9Y624	JAM1	Junctional adhesion molecule A OS=Homo sapiens GN=F11R PE=1 SV=1	2	574.826	0.9979	KVIYSQPSAR	3156.3	1701.27	3885.64	4145.93	2512.68
P02751	FINC	Fibronectin OS=Homo sapiens GN=FN1 PE=1 SV=4	2	675.348	0.9978	WLPSSSPVTGYR	2028.79	34921.5	196.913	696.311	763.582
P02787	TRFE	Serotransferrin OS=Homo sapiens GN=TF PE=1 SV=3	3	392.533	0.9978	LHDRNTYEK	63126.2	41509.8	265.482	1023.28	168.982
Q9Y4L1	HYOU1	Hypoxia up-regulated protein 1 OS=Homo sapiens GN=HYOU1 PE=1 SV=1	2	567.797	0.9978	TLGGLEMELR	372.175	505.019	164.669	350.534	26027.1
P04843	RPN1	Dolichyl-diphosphooligosaccharide--protein glycosyltransferase subunit 1 OS=Homo sapiens GN=RPN1 PE=1 SV=1	3	431.875	0.9978	LKTEGSDLCDR	965.623	4263.17	688.789	742.448	475.663
Q00325	MPCP	Phosphate carrier protein, mitochondrial OS=Homo sapiens GN=SLC25A3 PE=1 SV=2	2	473.254	0.9978	GVAPLWMR	2803.24	20362.4	808.609	5101.85	939.598
O43278	SPIT1	Kunitz-type protease inhibitor 1 OS=Homo sapiens GN=SPINT1 PE=1 SV=2	2	751.837	0.9978	WYYDPTEQICK	506.213	0	4332.32	450.297	22541.1
Q99470	SDF2	Stromal cell-derived factor 2 OS=Homo sapiens GN=SDF2 PE=1 SV=2	2	449.249	0.9978	LTHVNTGR	2354.9	1509.84	3052.45	2635.68	1490.58
P02751	FINC	Fibronectin OS=Homo sapiens GN=FN1 PE=1 SV=4	2	539.781	0.9977	QYNVGPSVSK	19655.8	18245.8	26155.4	15079.4	21120.1
P07237	PDIA1	Protein disulfide-isomerase OS=Homo sapiens GN=P4HB PE=1 SV=3	3	655.687	0.9977	HNQLPLVIEFTEQTAPK	2466.64	22952.2	1082.81	3030.94	3737.31
P14625	ENPL	Endoplasmin OS=Homo sapiens GN=HSP90B1 PE=1 SV=1	2	392.225	0.9977	YLNFVK	14807.6	16474.6	6425.82	6959	1248.34
Q06481	APLP2	Amyloid-like protein 2 OS=Homo sapiens GN=APLP2 PE=1 SV=2	2	616.795	0.9977	EWEEAELQAK	1116.71	1298.26	2288.06	175.857	31419.9
P08574	CY1	Cytochrome c1, heme protein, mitochondrial OS=Homo sapiens GN=CYC1 PE=1 SV=3	2	455.728	0.9977	DVCTFLR	1284.79	28.8252	3183.15	715.626	122331
Q8TCT9	HM13	Minor histocompatibility antigen H13 OS=Homo sapiens GN=HM13 PE=1 SV=1	2	669.318	0.9977	NASDMPETITSR	82646.4	5073.91	155.448	147.754	4290.49
P02787	TRFE	Serotransferrin OS=Homo sapiens GN=TF PE=1 SV=3	2	761.374	0.9976	LKCDEWSVNSVGK	58914.7	3077.6	17242.1	6321.73	4466.73
P07355	ANXA2	Annexin A2 OS=Homo sapiens GN=ANXA2 PE=1 SV=2	2	556.291	0.9976	QDIAFAYQR	27026.4	5283.71	32484.2	23373.8	341986
P07355	ANXA2	Annexin A2 OS=Homo sapiens GN=ANXA2 PE=1 SV=2	2	771.93	0.9976	GVDEVTIVNILTNR	37248.4	239.229	2646.57	1811	2944.22
P08195	4F2	4F2 cell-surface antigen heavy chain OS=Homo sapiens GN=SLC3A2 PE=1 SV=3	2	467.299	0.9976	GLVLGPIHK	5787.15	6481.96	27.4269	5116.5	0
P62937	PPIA	Peptidyl-prolyl cis-trans isomerase A OS=Homo sapiens GN=PPIA PE=1 SV=2	2	577.791	0.9976	FEDENFILK	41871.4	2568.72	5445.53	16711.6	3138.28
P27797	CALR	Calreticulin OS=Homo sapiens GN=CALR PE=1 SV=1	4	450.967	0.9976	IKDPDASKPEDWDER	1015.03	152.356	1030.38	32427.9	10893.9
P45880	VDAC2	Voltage-dependent anion-selective channel protein 2 OS=Homo sapiens GN=VDAC2 PE=1 SV=2	3	701.725	0.9976	VNNSSLIGVGYTQTLRPGVK	763.932	16026.9	725.738	370.248	280.878
Q07065	CKAP4	Cytoskeleton-associated protein 4 OS=Homo sapiens GN=CKAP4 PE=1 SV=2	2	737.395	0.9975	SVGELPSTVESLQK	115.11	9929.42	1.87429	274.441	0
P67809	YBOX1	Nuclease-sensitive element-binding protein 1 OS=Homo sapiens GN=YBX1 PE=1 SV=3	4	696.809	0.9975	EDGNEEDKENQGDETQGQQPPQRR	12816.3	7756.14	18015.5	20161.5	9198.12
O15230	LAMA5	Laminin subunit alpha-5 OS=Homo sapiens GN=LAMA5 PE=1 SV=8	3	725.675	0.9975	VSCISSHGAFGPNSAACLPSR	184.313	10921.7	175.614	261.239	817.707
O00116	ADAS	Alkyldihydroxyacetonephosphate synthase, peroxisomal OS=Homo sapiens GN=AGPS PE=1 SV=1	2	719.343	0.9975	EYVDPNNIFGNR	317.374	7639.37	1382.25	641.64	3548.93
P02787	TRFE	Serotransferrin OS=Homo sapiens GN=TF PE=1 SV=3	2	437.725	0.9974	DSAHGFLK	3561.95	272156	1952.87	2637.37	1190.12
Q15084	PDIA6	Protein disulfide-isomerase A6 OS=Homo sapiens GN=PDIA6 PE=1 SV=1	2	354.688	0.9974	ELSFGR	22990	14091.8	14088.1	16905.2	10939.3
Q06481	APLP2	Amyloid-like protein 2 OS=Homo sapiens GN=APLP2 PE=1 SV=2	2	479.738	0.9974	WYFDLSK	39.1805	2379.03	11.1192	113.058	103.412
Q07157	ZO1	Tight junction protein ZO-1 OS=Homo sapiens GN=TJP1 PE=1 SV=3	2	504.772	0.9974	VVDTLYNGK	3387.66	4329.14	4974.99	3758.92	5837.03
P10599	THIO	Thioredoxin OS=Homo sapiens GN=TXN PE=1 SV=3	2	668.826	0.9974	TAFQEALDAAGDK	1282.94	2488.19	12041	26981.9	155.502
O00592	PODXL	Podocalyxin OS=Homo sapiens GN=PODXL PE=1 SV=2	2	496.247	0.9974	ATFNPAQDK	26384.1	19905.4	43959.7	33491.1	50714.7
P02751	FINC	Fibronectin OS=Homo sapiens GN=FN1 PE=1 SV=4	2	978.01	0.9973	EESPLLIGQQSTVSDVPR	28470	533.703	0	0	154.88
Q9P2E9	RRBP1	Ribosome-binding protein 1 OS=Homo sapiens GN=RRBP1 PE=1 SV=4	3	509.247	0.9973	ELCHTQSSHASLR	4254.48	9151.12	3270.29	4478.08	2927.61
Q92896	GSLG1	Golgi apparatus protein 1 OS=Homo sapiens GN=GLG1 PE=1 SV=2	2	847.41	0.9973	ALNEACESVIQTACK	2911.81	498.88	22.7097	447.686	19531.9
P11169	GTR3	Solute carrier family 2, facilitated glucose transporter member 3 OS=Homo sapiens GN=SLC2A3 PE=2 SV=1	3	785.369	0.9973	SGKDGVMEMNSIEPAKETTTNV	11905.8	5887.14	939.504	107762	6023.35
P02787	TRFE	Serotransferrin OS=Homo sapiens GN=TF PE=1 SV=3	3	507.918	0.9972	LKCDEWSVNSVGK	428016	222967	79.9272	433.997	226.168
P02786	TFR1	Transferrin receptor protein 1 OS=Homo sapiens GN=TFRC PE=1 SV=2	2	508.83	0.9972	ILNIFGVIK	15768.5	0	165.563	0	414.688
O60716	CTND1	Catenin delta-1 OS=Homo sapiens GN=CTNND1 PE=1 SV=1	3	1001.5	0.9972	TVQPVAMGPDGLPVDASSVSNNYIQTLGR	678.995	926.563	31317.8	2121.77	1017.8
O15260	SURF4	Surfeit locus protein 4 OS=Homo sapiens GN=SURF4 PE=1 SV=3	3	676.643	0.9972	GQNDLMGTAEDFADQFLR	0	1013.05	37.2369	0	32.025
P14314	GLU2B	Glucosidase 2 subunit beta OS=Homo sapiens GN=PRKCSH PE=1 SV=2	2	646.321	0.9971	ESLQQMAEVTR	5353.49	850.488	2512.31	1587.95	48514.7
Q86X29	LSR	Lipolysis-stimulated lipoprotein receptor OS=Homo sapiens GN=LSR PE=1 SV=4	2	647.79	0.9971	IQASQQDDSMR	201.395	784.845	1895.39	905.631	879.913
P07237	PDIA1	Protein disulfide-isomerase OS=Homo sapiens GN=P4HB PE=1 SV=3	2	389.23	0.997	DGVVLFK	6288.36	2434.61	2447.79	2173.37	1820.43
P07355	ANXA2	Annexin A2 OS=Homo sapiens GN=ANXA2 PE=1 SV=2	2	419.207	0.997	SEVDMLK	91685	9871.04	123285	58289.6	70481.4
P10599	THIO	Thioredoxin OS=Homo sapiens GN=TXN PE=1 SV=3	3	493.928	0.997	MIKPFFHSLSEK	3796.93	8029.69	95.2483	2464.88	10.8998
Q15758	AAAT	Neutral amino acid transporter B(0) OS=Homo sapiens GN=SLC1A5 PE=1 SV=2	2	572.319	0.997	STEPELIQVK	3928.26	15509.3	57678.9	83701.5	38209.1
P07942	LAMB1	Laminin subunit beta-1 OS=Homo sapiens GN=LAMB1 PE=1 SV=2	3	722.393	0.997	VESLSQVEVILQHSAADIAR	76.667	135.092	388.523	7510.57	666.436
P14314	GLU2B	Glucosidase 2 subunit beta OS=Homo sapiens GN=PRKCSH PE=1 SV=2	2	646.318	0.9969	ESLQQMAEVTR	32834	10486.3	17054.8	7239.16	880.78
Q9Y4L1	HYOU1	Hypoxia up-regulated protein 1 OS=Homo sapiens GN=HYOU1 PE=1 SV=1	2	442.776	0.9968	RAVLQAAR	2920.22	2493.27	2499.83	3765.43	1689.13
P62937	PPIA	Peptidyl-prolyl cis-trans isomerase A OS=Homo sapiens GN=PPIA PE=1 SV=2	3	931.117	0.9968	HTGPGILSMANAGPNTNGSQFFICTAK	1192.95	64463	1854.87	6235.05	1778.21
P02751	FINC	Fibronectin OS=Homo sapiens GN=FN1 PE=1 SV=4	3	643.029	0.9967	FLATTPNSLLVSWQPPR	7010.81	11106.8	15389.3	2334.76	5023.27
P50454	SERPH	Serpin H1 OS=Homo sapiens GN=SERPINH1 PE=1 SV=2	3	546.583	0.9967	TGLYNYYDDEKEK	15.5524	167.9	2028.58	945.527	136589
Q96AG4	LRC59	Leucine-rich repeat-containing protein 59 OS=Homo sapiens GN=LRRC59 PE=1 SV=1	2	572.811	0.9967	LQQLPADFGR	3136.25	294.481	7748.16	7952.18	57841.6
P23284	PPIB	Peptidyl-prolyl cis-trans isomerase B OS=Homo sapiens GN=PPIB PE=1 SV=2	3	458.595	0.9966	IEVEKPFAIAKE	157.216	4626.02	0	0	0
P54707	AT12A	Potassium-transporting ATPase alpha chain 2 OS=Homo sapiens GN=ATP12A PE=1 SV=3	3	461.257	0.9966	VIMVTGDHPITAK	286.477	11.1445	10053.9	2741.14	30706.5
P02787	TRFE	Serotransferrin OS=Homo sapiens GN=TF PE=1 SV=3	2	437.726	0.9965	DSAHGFLK	473931	6407.37	6602.12	5571.11	6490.77
P46977	STT3A	Dolichyl-diphosphooligosaccharide--protein glycosyltransferase subunit STT3A OS=Homo sapiens GN=STT3A PE=1 SV=2	2	500.75	0.9965	EAYYWLR	1425.53	6945.76	166.234	3796.11	149.848
P23284	PPIB	Peptidyl-prolyl cis-trans isomerase B OS=Homo sapiens GN=PPIB PE=1 SV=2	2	682.857	0.9965	TVDNFVALATGEK	1313.87	521.106	31041.3	7386.31	3287.5
P02787	TRFE	Serotransferrin OS=Homo sapiens GN=TF PE=1 SV=3	3	399.186	0.9964	WCALSHHER	56143.2	343.57	1447.48	799.725	23383.7
Q00325	MPCP	Phosphate carrier protein, mitochondrial OS=Homo sapiens GN=SLC25A3 PE=1 SV=2	2	423.214	0.9964	MQVDPQK	2963.83	3715.93	2406.89	1412.85	3834.97
P00403	COX2	Cytochrome c oxidase subunit 2 OS=Homo sapiens GN=MT-CO2 PE=1 SV=1	3	753.724	0.9963	MMITSQDVLHSWAVPTLGLK	0	4276.39	744.516	3234.99	522.536
P10599	THIO	Thioredoxin OS=Homo sapiens GN=TXN PE=1 SV=3	2	629.849	0.9962	EKLEATINELV	28.3086	282.513	2191.06	70656	8820.45
P10599	THIO	Thioredoxin OS=Homo sapiens GN=TXN PE=1 SV=3	2	501.281	0.9962	LEATINELV	121.211	4437.37	2057.15	1029.58	1795.73
P17931	LEG3	Galectin-3 OS=Homo sapiens GN=LGALS3 PE=1 SV=5	3	552.989	0.9962	MLITILGTVKPNANR	26620	73.6216	430.408	86127.4	7932.48
Q14697	GANAB	Neutral alpha-glucosidase AB OS=Homo sapiens GN=GANAB PE=1 SV=3	2	486.796	0.9961	SLLLSVNAR	3927.08	5189.65	314.574	1774.33	189.377
P21796	VDAC1	Voltage-dependent anion-selective channel protein 1 OS=Homo sapiens GN=VDAC1 PE=1 SV=2	2	607.315	0.9961	VTQSNFAVGYK	13752.4	14858.1	37.8945	9641.04	156.945
P02751	FINC	Fibronectin OS=Homo sapiens GN=FN1 PE=1 SV=4	3	543.963	0.996	VDVIPVNLPGEHGQR	6014.55	34879.6	3738.16	10454	2576.39
P30533	AMRP	Alpha-2-macroglobulin receptor-associated protein OS=Homo sapiens GN=LRPAP1 PE=1 SV=1	2	451.739	0.996	SINQGLDR	12943.2	8598.09	15093.2	12687.1	15082.3
P62937	PPIA	Peptidyl-prolyl cis-trans isomerase A OS=Homo sapiens GN=PPIA PE=1 SV=2	3	611.311	0.996	SIYGEKFEDENFILK	13131.6	197295	25527.8	13178.4	49564.7
P02751	FINC	Fibronectin OS=Homo sapiens GN=FN1 PE=1 SV=4	2	678.353	0.9957	IYLYTLNDNAR	4488.27	50447.1	12874.9	5620.12	767.199
Q14315	FLNC	Filamin-C OS=Homo sapiens GN=FLNC PE=1 SV=3	2	595.778	0.9957	VGVTEGCDPTR	1904.39	108.177	1842.62	1266.67	2307.96
O00299	CLIC1	Chloride intracellular channel protein 1 OS=Homo sapiens GN=CLIC1 PE=1 SV=4	2	922.993	0.9957	LAALNPESNTAGLDIFAK	1389.32	22841.2	242.422	3591.66	229.263
P08195	4F2	4F2 cell-surface antigen heavy chain OS=Homo sapiens GN=SLC3A2 PE=1 SV=3	3	623.001	0.9955	IGDLQAFQGHGAGNLAGLK	69605.9	867.501	185.22	18382.1	79.748
Q9P2E9	RRBP1	Ribosome-binding protein 1 OS=Homo sapiens GN=RRBP1 PE=1 SV=4	3	604.648	0.9953	TLQEQLENGPNTQLAR	0	7239.48	0	0	0
P62937	PPIA	Peptidyl-prolyl cis-trans isomerase A OS=Homo sapiens GN=PPIA PE=1 SV=2	3	513.251	0.9953	VKEGMNIVEAMER	226.954	29.5463	1390.21	1177.53	46144.2
P00505	AATM	Aspartate aminotransferase, mitochondrial OS=Homo sapiens GN=GOT2 PE=1 SV=3	3	465.95	0.9952	IAAAILNTPDLRK	9.69461	0	275.582	2.81758	42720
O00584	RNT2	Ribonuclease T2 OS=Homo sapiens GN=RNASET2 PE=1 SV=2	2	572.335	0.9952	ELDLNSVLLK	26272	55.5937	1060.08	365.79	1493.33
P02751	FINC	Fibronectin OS=Homo sapiens GN=FN1 PE=1 SV=4	3	1014.87	0.9951	VVTPLSPPTNLHLEANPDTGVLTVSWER	1232.61	1806.83	963.891	124561	4481.99
P07237	PDIA1	Protein disulfide-isomerase OS=Homo sapiens GN=P4HB PE=1 SV=3	2	671.321	0.9951	NFEDVAFDEKK	23399.8	18289.8	1260.01	4109.42	465.226
Q96AG4	LRC59	Leucine-rich repeat-containing protein 59 OS=Homo sapiens GN=LRRC59 PE=1 SV=1	4	759.661	0.9951	DKLDGNELDLSLSDLNEVPVKELAALPK	782.272	19475.8	873.541	759.132	10839.6
P46977	STT3A	Dolichyl-diphosphooligosaccharide--protein glycosyltransferase subunit STT3A OS=Homo sapiens GN=STT3A PE=1 SV=2	2	583.773	0.9951	VGQAMASTEEK	173.098	7203.34	1602.3	1168.31	531.853
P10599	THIO	Thioredoxin OS=Homo sapiens GN=TXN PE=1 SV=3	2	629.85	0.9951	EKLEATINELV	3546.48	24335	2855.65	3047.37	241.499
P00505	AATM	Aspartate aminotransferase, mitochondrial OS=Homo sapiens GN=GOT2 PE=1 SV=3	3	465.95	0.995	IAAAILNTPDLRK	0.353888	3.6633	30498.6	4.48476	337.991
P10599	THIO	Thioredoxin OS=Homo sapiens GN=TXN PE=1 SV=3	2	629.849	0.995	EKLEATINELV	47492.1	5536.69	16624.8	5995.96	2877.23
O43852	CALU	Calumenin OS=Homo sapiens GN=CALU PE=1 SV=2	2	555.269	0.995	WIYEDVER	2106.54	346.814	10923.8	23887.8	1442.6
P02649	APOE	Apolipoprotein E OS=Homo sapiens GN=APOE PE=1 SV=1	3	698.354	0.9949	AYKSELEEQLTPVAEETR	4425.4	4423.71	21342.2	116572	3943.48
P50454	SERPH	Serpin H1 OS=Homo sapiens GN=SERPINH1 PE=1 SV=2	2	669.376	0.9949	HLAGLGLTEAIDK	1747.9	15230.3	3.78312	30.3492	0
Q07065	CKAP4	Cytoskeleton-associated protein 4 OS=Homo sapiens GN=CKAP4 PE=1 SV=2	2	626.844	0.9948	TAVDSLVAYSVK	452.431	7130.99	346.443	910.527	565.877
P02787	TRFE	Serotransferrin OS=Homo sapiens GN=TF PE=1 SV=3	5	510.666	0.9947	KPVDEYKDCHLAQVPSHTVVAR	252.134	340715	3022.97	1181.22	1726.44
P02787	TRFE	Serotransferrin OS=Homo sapiens GN=TF PE=1 SV=3	3	498.916	0.9947	MYLGYEYVTAIR	1080.33	4003.06	1098.33	240.197	983.629
Q14247	SRC8	Src substrate cortactin OS=Homo sapiens GN=CTTN PE=1 SV=2	2	785.407	0.9947	YGLFPANYVELRQ	4382.24	19181.8	934.741	3536.4	3430.68
P46977	STT3A	Dolichyl-diphosphooligosaccharide--protein glycosyltransferase subunit STT3A OS=Homo sapiens GN=STT3A PE=1 SV=2	2	463.244	0.9947	ILFDDFR	2660.44	13816.9	673.19	1506.39	130.32
P02786	TFR1	Transferrin receptor protein 1 OS=Homo sapiens GN=TFRC PE=1 SV=2	2	479.801	0.9941	SGVGTALLLK	14879.4	10308.2	803.942	233.993	144.644
P16422	EPCAM	Epithelial cell adhesion molecule OS=Homo sapiens GN=EPCAM PE=1 SV=2	2	970.937	0.9941	QCQCTSVGAQNTVICSK	14145.2	0	0	2196.06	0
Q96AG4	LRC59	Leucine-rich repeat-containing protein 59 OS=Homo sapiens GN=LRRC59 PE=1 SV=1	2	572.811	0.9941	LQQLPADFGR	1986.05	895.228	4088.54	28819.6	7095.63
Q53GQ0	DHB12	Very-long-chain 3-oxoacyl-CoA reductase OS=Homo sapiens GN=HSD17B12 PE=1 SV=2	2	827.967	0.9941	GVFVQSVLPYFVATK	333.08	8210.98	730.75	685.108	0
Q15084	PDIA6	Protein disulfide-isomerase A6 OS=Homo sapiens GN=PDIA6 PE=1 SV=1	2	467.26	0.994	TRSDIVSR	15493.7	11391.7	10180.7	15585.6	6051.74
P50454	SERPH	Serpin H1 OS=Homo sapiens GN=SERPINH1 PE=1 SV=2	4	500.782	0.994	LSSLIILMPHHVEPLER	636.366	40674.1	6817.03	577.77	2278.83
Q8WTV0	SCRB1	Scavenger receptor class B member 1 OS=Homo sapiens GN=SCARB1 PE=1 SV=1	2	491.753	0.9938	TFQFQPSK	4688.69	3353.64	27601.9	16059.6	9746.16
P02787	TRFE	Serotransferrin OS=Homo sapiens GN=TF PE=1 SV=3	2	638.821	0.9937	EFQLFSSPHGK	98811	1646.13	2039.06	378.742	981.82
P08195	4F2	4F2 cell-surface antigen heavy chain OS=Homo sapiens GN=SLC3A2 PE=1 SV=3	2	492.719	0.9937	HWDQNER	3502.95	2762.95	2276.56	4442.13	1150.32
P62937	PPIA	Peptidyl-prolyl cis-trans isomerase A OS=Homo sapiens GN=PPIA PE=1 SV=2	2	639.796	0.9937	EGMNIVEAMER	42894.4	1624.25	6443.87	635.769	1654.98
Q08554	DSC1	Desmocollin-1 OS=Homo sapiens GN=DSC1 PE=1 SV=2	3	493.58	0.9937	VQDQDLPNTPHSK	3579.68	1222.07	1631.53	1398.96	2678.73
Q07065	CKAP4	Cytoskeleton-associated protein 4 OS=Homo sapiens GN=CKAP4 PE=1 SV=2	2	493.798	0.9936	LALQALTEK	4000.97	2649.53	1975.7	705.567	105.061
Q15084	PDIA6	Protein disulfide-isomerase A6 OS=Homo sapiens GN=PDIA6 PE=1 SV=1	4	646.086	0.9935	VGAVDADKHHSLGGQYGVQGFPTIK	726.066	464.115	1709.37	94330.2	934.634
P08174	DAF	Complement decay-accelerating factor OS=Homo sapiens GN=CD55 PE=1 SV=4	3	453.574	0.9935	IPGEKDSVICLK	6.31385	3.58591	21959.2	743.209	50572.3
P23284	PPIB	Peptidyl-prolyl cis-trans isomerase B OS=Homo sapiens GN=PPIB PE=1 SV=2	2	516.283	0.9935	VLEGMEVVR	17444.4	7087.82	2305.88	4265.16	1197.99
O43278	SPIT1	Kunitz-type protease inhibitor 1 OS=Homo sapiens GN=SPINT1 PE=1 SV=2	2	601.288	0.9935	SFVYGGCLGNK	5711.37	5868.54	795.749	1081.16	162.22
P02751	FINC	Fibronectin OS=Homo sapiens GN=FN1 PE=1 SV=4	3	973.487	0.9934	TGLDSPTGIDFSDITANSFTVHWIAPR	244.881	5493.38	0	664.099	9594.48
Q9Y624	JAM1	Junctional adhesion molecule A OS=Homo sapiens GN=F11R PE=1 SV=1	2	544.277	0.9933	DGIVMPTNPK	1896.47	3782.45	11046.5	7850.9	6979.64
Q12864	CAD17	Cadherin-17 OS=Homo sapiens GN=CDH17 PE=2 SV=3	3	590.315	0.9932	IDHVTGEIFSVAPLDR	26446.5	326.547	4793.56	7546.52	31781.9
Q9Y4L1	HYOU1	Hypoxia up-regulated protein 1 OS=Homo sapiens GN=HYOU1 PE=1 SV=1	3	575.012	0.993	VAIVKPGVPMEIVLNK	80.0408	138.75	57.4311	42698.5	2209.28
P02751	FINC	Fibronectin OS=Homo sapiens GN=FN1 PE=1 SV=4	3	441.91	0.9929	LGVRPSQGGEAPR	901.496	279.364	314.258	9925.77	53.5547
Q8TDB8	GTR14	Solute carrier family 2, facilitated glucose transporter member 14 OS=Homo sapiens GN=SLC2A14 PE=2 SV=1	2	388.246	0.9929	FLLINR	64472.4	7290.56	568.594	33669.7	534.245
O43278	SPIT1	Kunitz-type protease inhibitor 1 OS=Homo sapiens GN=SPINT1 PE=1 SV=2	2	590.262	0.9927	EEECILACR	2554.21	2230.7	3354.2	2332.21	613.63
Q14118	DAG1	Dystroglycan OS=Homo sapiens GN=DAG1 PE=1 SV=2	2	437.244	0.9927	EQIAGLSR	2893.14	4313.21	4862.47	4208.8	5071.71
P50454	SERPH	Serpin H1 OS=Homo sapiens GN=SERPINH1 PE=1 SV=2	2	647.864	0.9926	LQIVEMPLAHK	4918.04	1439.93	1606.15	39949.7	5990.92
P21912	SDHB	Succinate dehydrogenase [ubiquinone] iron-sulfur subunit, mitochondrial OS=Homo sapiens GN=SDHB PE=1 SV=3	2	409.225	0.9926	IDTNLNK	4680.62	2125.99	2448.79	2015.51	2774.6
Q92542	NICA	Nicastrin OS=Homo sapiens GN=NCSTN PE=1 SV=2	2	520.318	0.9925	SGAGVPAVILR	5.31385	84.3166	6489.6	136.362	18620.6
P51149	RAB7A	Ras-related protein Rab-7a OS=Homo sapiens GN=RAB7A PE=1 SV=1	2	529.317	0.9924	VIILGDSGVGK	858.359	16.6468	16108.4	220.602	550.052
Q92896	GSLG1	Golgi apparatus protein 1 OS=Homo sapiens GN=GLG1 PE=1 SV=2	2	477.204	0.9922	FCPEADSK	724.102	4964.72	3624.02	2357.9	3557.58
P00505	AATM	Aspartate aminotransferase, mitochondrial OS=Homo sapiens GN=GOT2 PE=1 SV=3	2	517.748	0.992	EFSIYMTK	6181.7	6252.64	2471.32	6801.77	246.529
P60953	CDC42	Cell division control protein 42 homolog OS=Homo sapiens GN=CDC42 PE=1 SV=2	3	786.759	0.992	TPFLLVGTQIDLRDDPSTIEK	237.731	47.9027	45.1577	24642	2990.03
O15230	LAMA5	Laminin subunit alpha-5 OS=Homo sapiens GN=LAMA5 PE=1 SV=8	3	541.279	0.9919	LELEEAATPEGHAVR	5361.36	6791.36	876.486	636.582	196.463
P05090	APOD	Apolipoprotein D OS=Homo sapiens GN=APOD PE=1 SV=1	2	436.254	0.9917	VLNQELR	820.864	128.01	382.544	1423.69	13853.3
Q07157	ZO1	Tight junction protein ZO-1 OS=Homo sapiens GN=TJP1 PE=1 SV=3	2	643.833	0.9916	DGNIQEGDVVLK	8038.97	10224.6	551.704	4952.31	821.897
P46977	STT3A	Dolichyl-diphosphooligosaccharide--protein glycosyltransferase subunit STT3A OS=Homo sapiens GN=STT3A PE=1 SV=2	2	593.334	0.9913	NLDISRPDKK	786.937	3789.32	399.509	85.2022	240.076
P14174	MIF	Macrophage migration inhibitory factor OS=Homo sapiens GN=MIF PE=1 SV=4	2	522.798	0.9911	LLCGLLAER	571.156	422.906	45043.4	3049.36	3094.39
P02751	FINC	Fibronectin OS=Homo sapiens GN=FN1 PE=1 SV=4	2	404.72	0.9908	AQITGYR	10973.2	11986.7	13365.2	12097.3	14832.9
P14625	ENPL	Endoplasmin OS=Homo sapiens GN=HSP90B1 PE=1 SV=1	3	910.12	0.9908	TDDEVVQREEEAIQLDGLNASQIR	1470.92	39920	908.646	292.589	511.066
P00505	AATM	Aspartate aminotransferase, mitochondrial OS=Homo sapiens GN=GOT2 PE=1 SV=3	4	588.824	0.9908	ISVAGVTSSNVGYLAHAIHQVTK	35575	22.8396	2441.77	382.977	9581.47
P02751	FINC	Fibronectin OS=Homo sapiens GN=FN1 PE=1 SV=4	2	374.194	0.9906	IGDTWR	4240.63	5142.65	5573.08	6234.09	3521.22
Q92542	NICA	Nicastrin OS=Homo sapiens GN=NCSTN PE=1 SV=2	2	485.274	0.9906	APDVTTLPR	80.4705	36.9534	327.024	922.195	21384.6
P05556	ITB1	Integrin beta-1 OS=Homo sapiens GN=ITGB1 PE=1 SV=2	2	492.264	0.9902	IGFGSFVEK	4923.46	52.2364	112.514	187.419	82.9957
P10599	THIO	Thioredoxin OS=Homo sapiens GN=TXN PE=1 SV=3	3	493.929	0.9901	MIKPFFHSLSEK	12.3407	4.57978	1929.2	10956.1	1331.4
P28799	GRN	Granulins OS=Homo sapiens GN=GRN PE=1 SV=2	2	501.778	0.9901	GSEIVAGLEK	3185.12	2572.26	4344.91	3995.35	1918.79
Q9Y4L1	HYOU1	Hypoxia up-regulated protein 1 OS=Homo sapiens GN=HYOU1 PE=1 SV=1	2	503.783	0.9898	EVQYLLNK	8072.39	6128.18	11639.5	9493.74	1695.03
P07355	ANXA2	Annexin A2 OS=Homo sapiens GN=ANXA2 PE=1 SV=2	3	615.641	0.9898	LSLEGDHSTPPSAYGSVK	39102.2	599.913	0	383.937	0
P51149	RAB7A	Ras-related protein Rab-7a OS=Homo sapiens GN=RAB7A PE=1 SV=1	2	594.317	0.9894	FQSLGVAFYR	420.751	4142.74	1493.96	1621.89	1369.39
P02751	FINC	Fibronectin OS=Homo sapiens GN=FN1 PE=1 SV=4	2	414.751	0.989	TIKPDVR	5424.31	5526.07	5779.26	5938.25	2948.89
P05556	ITB1	Integrin beta-1 OS=Homo sapiens GN=ITGB1 PE=1 SV=2	2	662.845	0.989	TVMPYISTTPAK	2782.09	452.264	0	571.025	16069.8
P15529	MCP	Membrane cofactor protein OS=Homo sapiens GN=CD46 PE=1 SV=3	3	543.622	0.9889	GSVAIWSGKPPICEK	0	197.019	17507.8	269.796	230.952
P07355	ANXA2	Annexin A2 OS=Homo sapiens GN=ANXA2 PE=1 SV=2	2	544.305	0.9885	DALNIETAIK	10368.7	1865.72	13480.4	18131.7	151827
P07355	ANXA2	Annexin A2 OS=Homo sapiens GN=ANXA2 PE=1 SV=2	2	543.748	0.9884	AYTNFDAER	665.373	279.464	3040	2161.97	21842.2
P28799	GRN	Granulins OS=Homo sapiens GN=GRN PE=1 SV=2	3	432.565	0.9882	CITPTGTHPLAK	2981.17	2660.34	2624.08	3453.54	1465.21
P14314	GLU2B	Glucosidase 2 subunit beta OS=Homo sapiens GN=PRKCSH PE=1 SV=2	2	658.349	0.9876	TVKEEAEKPER	4076.15	3495.23	4599.69	2782.84	1784.54
P50454	SERPH	Serpin H1 OS=Homo sapiens GN=SERPINH1 PE=1 SV=2	3	432.246	0.9875	LQIVEMPLAHK	24262	28418.2	520.945	3278.52	428.743
Q14108	SCRB2	Lysosome membrane protein 2 OS=Homo sapiens GN=SCARB2 PE=1 SV=2	2	445.236	0.9875	AVDQSIEK	2506.6	4793.18	3952.51	3791.82	4743.03
Q07157	ZO1	Tight junction protein ZO-1 OS=Homo sapiens GN=TJP1 PE=1 SV=3	2	544.303	0.9873	GEEVTILAQK	2323.91	4115.54	3178.86	3403.91	2215.03
Q15084	PDIA6	Protein disulfide-isomerase A6 OS=Homo sapiens GN=PDIA6 PE=1 SV=1	2	757.883	0.9871	NLEPEWAAAASEVK	2395.06	17530.3	1291.54	788.72	574.923
O94907	DKK1	Dickkopf-related protein 1 OS=Homo sapiens GN=DKK1 PE=1 SV=1	2	429.268	0.9867	ICKPVLK	6757.69	4425.98	5664.25	7480.87	3619.07
P11166	GTR1	Solute carrier family 2, facilitated glucose transporter member 1 OS=Homo sapiens GN=SLC2A1 PE=1 SV=2	3	833.401	0.9867	QGGASQSDKTPEELFHPLGADSQV	674.68	91348	777.083	3621.04	4834.69
Q14247	SRC8	Src substrate cortactin OS=Homo sapiens GN=CTTN PE=1 SV=2	3	369.182	0.9865	SAVGHEYQSK	2960.72	1858	3057.76	2728.99	2378.31
P07237	PDIA1	Protein disulfide-isomerase OS=Homo sapiens GN=P4HB PE=1 SV=3	2	1357.17	0.9864	QFLQAAEAIDDIPFGITSNSDVFSK	18190.7	1638.88	0	922.914	363.223
P02751	FINC	Fibronectin OS=Homo sapiens GN=FN1 PE=1 SV=4	2	675.346	0.9863	WLPSSSPVTGYR	13405.6	3857.01	10261.1	17294.7	81984.1
Q8TDB8	GTR14	Solute carrier family 2, facilitated glucose transporter member 14 OS=Homo sapiens GN=SLC2A14 PE=2 SV=1	2	388.245	0.9863	FLLINR	789.016	167.834	137761	16715.8	571.581
P49755	TMEDA	Transmembrane emp24 domain-containing protein 10 OS=Homo sapiens GN=TMED10 PE=1 SV=2	3	418.268	0.9862	LKPLEVELRR	1.74448	0	30.5115	9995.7	30.7491
P07237	PDIA1	Protein disulfide-isomerase OS=Homo sapiens GN=P4HB PE=1 SV=3	2	404.733	0.9861	TLDGFKK	10720.9	7642.39	5981	8708.9	3681.88
P06744	G6PI	Glucose-6-phosphate isomerase OS=Homo sapiens GN=GPI PE=1 SV=4	2	423.205	0.986	SPEDLER	2126.19	2519.31	3109.93	2163.06	3924.54
P11169	GTR3	Solute carrier family 2, facilitated glucose transporter member 3 OS=Homo sapiens GN=SLC2A3 PE=2 SV=1	3	780.037	0.9859	SGKDGVMEMNSIEPAKETTTNV	83675.1	1408.32	2457.81	678.694	327.333
P07355	ANXA2	Annexin A2 OS=Homo sapiens GN=ANXA2 PE=1 SV=2	2	544.3	0.9857	DALNIETAIK	22510	2950	99211.9	12867.5	92941.8
P07237	PDIA1	Protein disulfide-isomerase OS=Homo sapiens GN=P4HB PE=1 SV=3	2	603.822	0.9856	LITLEEEMTK	1207.08	1962.19	25665.8	23237.7	25697.3
P05556	ITB1	Integrin beta-1 OS=Homo sapiens GN=ITGB1 PE=1 SV=2	2	548.799	0.9856	LSEGVTISYK	7021.37	4215.88	143.895	42.275	214.769
Q14697	GANAB	Neutral alpha-glucosidase AB OS=Homo sapiens GN=GANAB PE=1 SV=3	2	533.799	0.9853	NPEPELLVR	389.295	4249.8	0	25.227	58.9491
P07355	ANXA2	Annexin A2 OS=Homo sapiens GN=ANXA2 PE=1 SV=2	2	373.237	0.9852	LMVALAK	9481.94	3202.54	2695.06	2503.13	2988.15
Q9Y4L1	HYOU1	Hypoxia up-regulated protein 1 OS=Homo sapiens GN=HYOU1 PE=1 SV=1	2	567.797	0.9849	TLGGLEMELR	357.488	7053.85	50.6294	434.978	652.66
P14625	ENPL	Endoplasmin OS=Homo sapiens GN=HSP90B1 PE=1 SV=1	3	910.12	0.9846	TDDEVVQREEEAIQLDGLNASQIR	1565.71	1340.64	47893.9	4346.07	314.161
P12235	ADT1	ADP\ATP translocase 1 OS=Homo sapiens GN=SLC25A4 PE=1 SV=4	3	932.789	0.984	YFAGNLASGGAAGATSLCFVYPLDFAR	4593.13	9682.62	11382.8	3787.17	1585.91
P00505	AATM	Aspartate aminotransferase, mitochondrial OS=Homo sapiens GN=GOT2 PE=1 SV=3	2	470.222	0.9838	NMGLYGER	5621.2	1883.34	2185.77	1842.99	6743.24
P17931	LEG3	Galectin-3 OS=Homo sapiens GN=LGALS3 PE=1 SV=5	2	431.756	0.9836	IALDFQR	791.423	20.1531	175.476	8166.48	19277.7
P30533	AMRP	Alpha-2-macroglobulin receptor-associated protein OS=Homo sapiens GN=LRPAP1 PE=1 SV=1	2	398.228	0.9835	HALLEGR	5320.94	5212.91	2476.17	5087.38	1389.75
P07237	PDIA1	Protein disulfide-isomerase OS=Homo sapiens GN=P4HB PE=1 SV=3	2	431.738	0.9834	ALAPEYAK	27774	17456.1	33983.6	26494.7	37042.2
P02751	FINC	Fibronectin OS=Homo sapiens GN=FN1 PE=1 SV=4	3	898.131	0.9833	FTQVTPTSLSAQWTPPNVQLTGYR	4716.25	1071.83	2231.92	40465.4	622.467
P07237	PDIA1	Protein disulfide-isomerase OS=Homo sapiens GN=P4HB PE=1 SV=3	2	483.788	0.9829	ILEFFGLK	0.0142465	5472	1238.61	562.268	336.373
P14314	GLU2B	Glucosidase 2 subunit beta OS=Homo sapiens GN=PRKCSH PE=1 SV=2	2	511.75	0.9829	NKFEEAER	12345.6	8822.19	10569.6	11485	6991.16
P07237	PDIA1	Protein disulfide-isomerase OS=Homo sapiens GN=P4HB PE=1 SV=3	2	485.773	0.9828	QLAPIWDK	16774.9	48.1308	9.01074	724.733	61.6447
P02751	FINC	Fibronectin OS=Homo sapiens GN=FN1 PE=1 SV=4	2	963.531	0.9826	VTWAPPPSIDLTNFLVR	269.496	17938.8	54.8822	1054.62	745.739
P02787	TRFE	Serotransferrin OS=Homo sapiens GN=TF PE=1 SV=3	3	671.012	0.9826	SETKDLLFRDDTVCLAK	62417.5	95904.5	23530.1	9522.72	13397.9
O00584	RNT2	Ribonuclease T2 OS=Homo sapiens GN=RNASET2 PE=1 SV=2	2	572.336	0.9826	ELDLNSVLLK	610.112	17217.1	430.613	254.699	939.956
P05023	AT1A1	Sodium\potassium-transporting ATPase subunit alpha-1 OS=Homo sapiens GN=ATP1A1 PE=1 SV=1	2	792.943	0.9819	AVFQANQENLPILK	678.64	640.557	21.5552	415.752	51619.1
Q8TCT9	HM13	Minor histocompatibility antigen H13 OS=Homo sapiens GN=HM13 PE=1 SV=1	2	601.345	0.9819	LVFPQDLLEK	453.618	11.1703	28144.2	1179.27	42428.9
P07858	CATB	Cathepsin B OS=Homo sapiens GN=CTSB PE=1 SV=3	2	643.815	0.9819	EQWPQCPTIK	233.216	6329.22	0	59.8596	48.3396
Q15084	PDIA6	Protein disulfide-isomerase A6 OS=Homo sapiens GN=PDIA6 PE=1 SV=1	2	369.214	0.9817	LADKYK	2869.8	1693.35	2706.44	2937.79	1802.59
Q92544	TM9S4	Transmembrane 9 superfamily member 4 OS=Homo sapiens GN=TM9SF4 PE=1 SV=2	2	396.754	0.9815	KIYAAVK	2042.87	2040.89	396.128	1166.22	435.703
P17931	LEG3	Galectin-3 OS=Homo sapiens GN=LGALS3 PE=1 SV=5	3	499.931	0.9811	QSVFPFESGKPFK	3.33939	11.2949	6675.84	11.8383	35092.1
O43852	CALU	Calumenin OS=Homo sapiens GN=CALU PE=1 SV=2	2	555.268	0.9809	WIYEDVER	14112.1	11813.6	736.703	2864.69	699.81
P02751	FINC	Fibronectin OS=Homo sapiens GN=FN1 PE=1 SV=4	2	584.278	0.9805	FTNIGPDTMR	1691.11	1600.5	20927.1	804.77	539.365
Q07157	ZO1	Tight junction protein ZO-1 OS=Homo sapiens GN=TJP1 PE=1 SV=3	2	416.239	0.98	KGDSVGLR	2087.94	2166	1677.73	1395.72	1347.36
P02649	APOE	Apolipoprotein E OS=Homo sapiens GN=APOE PE=1 SV=1	3	562.633	0.9799	DRLDEVKEQVAEVR	1815.65	1317.03	1172.65	42955.5	2258.47
P07355	ANXA2	Annexin A2 OS=Homo sapiens GN=ANXA2 PE=1 SV=2	4	485.747	0.9794	TDLEKDIISDTSGDFRK	0	0	78.3753	8294.82	0
P11169	GTR3	Solute carrier family 2, facilitated glucose transporter member 3 OS=Homo sapiens GN=SLC2A3 PE=2 SV=1	3	699.984	0.9792	DGVMEMNSIEPAKETTTNV	21.788	691.262	36642.4	660.384	535.527
P02751	FINC	Fibronectin OS=Homo sapiens GN=FN1 PE=1 SV=4	3	444.578	0.9791	ESKPLTAQQTTK	6707.12	6116.61	8719.25	7537.35	9950.09
P05026	AT1B1	Sodium\potassium-transporting ATPase subunit beta-1 OS=Homo sapiens GN=ATP1B1 PE=1 SV=1	2	745.443	0.979	VAPPGLTQIPQIQK	58.0425	25276.1	634.397	138.17	0
P00505	AATM	Aspartate aminotransferase, mitochondrial OS=Homo sapiens GN=GOT2 PE=1 SV=3	2	509.751	0.9788	EFSIYMTK	189.573	45.6684	165.658	106.361	18298
P16422	EPCAM	Epithelial cell adhesion molecule OS=Homo sapiens GN=EPCAM PE=1 SV=2	3	745.029	0.9782	TQNDVDIADVAYYFEKDVK	43.751	0.123485	74.7476	11428.2	225.323
P08174	DAF	Complement decay-accelerating factor OS=Homo sapiens GN=CD55 PE=1 SV=4	2	700.853	0.9781	TSFPEDTVITYK	11284.4	12072.2	29397.1	12466.2	224826
P08174	DAF	Complement decay-accelerating factor OS=Homo sapiens GN=CD55 PE=1 SV=4	3	979.477	0.978	QPYITQNYFPVGTVVEYECRPGYR	2676.62	638.011	11936.6	66553.8	2468.65
P02787	TRFE	Serotransferrin OS=Homo sapiens GN=TF PE=1 SV=3	3	671.012	0.9778	SETKDLLFRDDTVCLAK	373989	6729.21	26560.8	98799.2	21603.9
Q8TDB8	GTR14	Solute carrier family 2, facilitated glucose transporter member 14 OS=Homo sapiens GN=SLC2A14 PE=2 SV=1	2	388.246	0.9778	FLLINR	22898.4	267.057	3009.25	484.342	1409.54
P02787	TRFE	Serotransferrin OS=Homo sapiens GN=TF PE=1 SV=3	6	425.723	0.9774	KPVDEYKDCHLAQVPSHTVVAR	39146.6	68.0108	2065.88	292.912	6297.85
O00584	RNT2	Ribonuclease T2 OS=Homo sapiens GN=RNASET2 PE=1 SV=2	2	572.336	0.9773	ELDLNSVLLK	214.811	839.552	591.573	32797.6	1251.56
P02787	TRFE	Serotransferrin OS=Homo sapiens GN=TF PE=1 SV=3	4	743.587	0.9768	LCMGSGLNLCEPNNKEGYYGYTGAFR	36317	3009.96	288.841	3456.34	3325.56
P16435	NCPR	NADPH--cytochrome P450 reductase OS=Homo sapiens GN=POR PE=1 SV=2	2	502.791	0.9767	IQTLTSSVR	2224.29	5012.24	2299.16	2352.87	2733.02
P02649	APOE	Apolipoprotein E OS=Homo sapiens GN=APOE PE=1 SV=1	2	409.202	0.9766	AQAWGER	1159.73	832.098	11884.9	9806.8	10508.8
P07355	ANXA2	Annexin A2 OS=Homo sapiens GN=ANXA2 PE=1 SV=2	2	526.267	0.9762	WISIMTER	23286.8	15659.1	1817.49	4388.73	6620.01
P17931	LEG3	Galectin-3 OS=Homo sapiens GN=LGALS3 PE=1 SV=5	3	425.209	0.9762	GNDVAFHFNPR	231.832	142.054	592.266	23554.6	815.286
P11169	GTR3	Solute carrier family 2, facilitated glucose transporter member 3 OS=Homo sapiens GN=SLC2A3 PE=2 SV=1	3	780.036	0.9761	SGKDGVMEMNSIEPAKETTTNV	398.767	570.134	1802.89	776.173	95137
Q9NZM1	MYOF	Myoferlin OS=Homo sapiens GN=MYOF PE=1 SV=1	3	384.201	0.9751	DLTQTASSTAR	11315.2	9353.38	17901.5	12815.1	13070.4
Q92896	GSLG1	Golgi apparatus protein 1 OS=Homo sapiens GN=GLG1 PE=1 SV=2	2	475.22	0.9745	NSELMDPK	794.094	3182.46	3758.36	3284.57	2041.7
P50454	SERPH	Serpin H1 OS=Homo sapiens GN=SERPINH1 PE=1 SV=2	3	394.889	0.9738	KPAAAAAPGTAEK	1145.78	1592.18	2980.99	2856.6	3901.51
P17931	LEG3	Galectin-3 OS=Homo sapiens GN=LGALS3 PE=1 SV=5	3	499.931	0.9738	QSVFPFESGKPFK	240.316	11280.4	1.21905	123.015	43.2716
P27824	CALX	Calnexin OS=Homo sapiens GN=CANX PE=1 SV=2	2	407.726	0.9737	RPDADLK	17533.9	11479.9	18392	17862.4	10154.9
Q12864	CAD17	Cadherin-17 OS=Homo sapiens GN=CDH17 PE=2 SV=3	3	590.316	0.9737	IDHVTGEIFSVAPLDR	364.363	107.494	36535.4	1090.43	8722.46
P07237	PDIA1	Protein disulfide-isomerase OS=Homo sapiens GN=P4HB PE=1 SV=3	2	501.783	0.9736	LKAEGSEIR	17563	11956.4	15007.9	14347.7	10259.4
P06703	S10A6	Protein S100-A6 OS=Homo sapiens GN=S100A6 PE=1 SV=1	2	454.214	0.9736	LMEDLDR	5276.77	3148.21	9330.55	6293.06	9204.42
Q8TCT9	HM13	Minor histocompatibility antigen H13 OS=Homo sapiens GN=HM13 PE=1 SV=1	2	396.22	0.9725	SFEAPIK	2087.7	3550.49	3328.93	3529.67	3913.03
P02751	FINC	Fibronectin OS=Homo sapiens GN=FN1 PE=1 SV=4	2	429.72	0.9724	SDTVPSPR	9503.72	9718.91	15486.9	14058.9	17693.2
P02787	TRFE	Serotransferrin OS=Homo sapiens GN=TF PE=1 SV=3	2	604.77	0.9722	CQSFRDHMK	11027.1	2059.79	497.965	344.003	828.923
P05090	APOD	Apolipoprotein D OS=Homo sapiens GN=APOD PE=1 SV=1	2	712.377	0.9721	NPNLPPETVDSLK	6624.3	1632.11	85701.3	2531	799.482
Q06481	APLP2	Amyloid-like protein 2 OS=Homo sapiens GN=APLP2 PE=1 SV=2	2	369.714	0.9717	FVTPFK	145.781	0.00130842	251.864	111.289	34239.2
P17931	LEG3	Galectin-3 OS=Homo sapiens GN=LGALS3 PE=1 SV=5	3	425.208	0.9712	GNDVAFHFNPR	8889.52	10731.9	556.439	280.831	451.371
Q92896	GSLG1	Golgi apparatus protein 1 OS=Homo sapiens GN=GLG1 PE=1 SV=2	2	569.779	0.9708	QITQNTDYR	4309.22	5549.46	6708.1	5200.25	6455.24
Q06481	APLP2	Amyloid-like protein 2 OS=Homo sapiens GN=APLP2 PE=1 SV=2	2	369.714	0.9706	FVTPFK	14841.3	10197.8	7111.7	11936	318.264
P02649	APOE	Apolipoprotein E OS=Homo sapiens GN=APOE PE=1 SV=1	2	579.829	0.9705	EGAERGLSAIR	98193.1	14682.3	122805	97493.2	9149.74
P02751	FINC	Fibronectin OS=Homo sapiens GN=FN1 PE=1 SV=4	2	555.777	0.9704	STTPDITGYR	19469.9	9635	5092.58	4602.04	81767
Q12864	CAD17	Cadherin-17 OS=Homo sapiens GN=CDH17 PE=2 SV=3	2	407.738	0.9697	IVEQTPK	1075.13	972.636	3957.72	2815.54	4783.21
P02751	FINC	Fibronectin OS=Homo sapiens GN=FN1 PE=1 SV=4	2	393.18	0.9696	MSESGFK	3757.18	2387.24	3393.1	2336.92	6011.52
P07237	PDIA1	Protein disulfide-isomerase OS=Homo sapiens GN=P4HB PE=1 SV=3	2	533.763	0.9694	TVIDYNGER	5621.72	639.689	13212.6	4471.14	50742.3
Q14247	SRC8	Src substrate cortactin OS=Homo sapiens GN=CTTN PE=1 SV=2	2	434.703	0.9692	FGVQMDR	4684.71	4227.64	8705.55	6462.53	4100.67
P21912	SDHB	Succinate dehydrogenase [ubiquinone] iron-sulfur subunit, mitochondrial OS=Homo sapiens GN=SDHB PE=1 SV=3	2	569.8	0.9689	LQDPFSLYR	2430.41	21.6262	7006.59	126.714	24599.8
P07237	PDIA1	Protein disulfide-isomerase OS=Homo sapiens GN=P4HB PE=1 SV=3	2	483.79	0.9684	ILEFFGLK	740.469	3935.4	22122	6.93653	22.6639
P12830	CADH1	Cadherin-1 OS=Homo sapiens GN=CDH1 PE=1 SV=3	2	494.788	0.9679	VGTDGVITVK	3155.45	2567.83	3797.83	2946.25	2541.06
P14625	ENPL	Endoplasmin OS=Homo sapiens GN=HSP90B1 PE=1 SV=1	2	482.298	0.9678	LIINSLYK	315.958	12.2536	326.756	82.3705	45888.5
P27824	CALX	Calnexin OS=Homo sapiens GN=CANX PE=1 SV=2	3	703.337	0.9671	IPDPEAVKPDDWDEDAPAK	11226	13906.9	3992.46	86425.7	23335.6
P27797	CALR	Calreticulin OS=Homo sapiens GN=CALR PE=1 SV=1	3	600.953	0.9671	IKDPDASKPEDWDER	3749.52	806.371	3409.04	47508.4	545.413
Q06481	APLP2	Amyloid-like protein 2 OS=Homo sapiens GN=APLP2 PE=1 SV=2	2	616.796	0.9669	EWEEAELQAK	1257.41	656.082	43721.7	1478.63	1134.21
Q02818	NUCB1	Nucleobindin-1 OS=Homo sapiens GN=NUCB1 PE=1 SV=4	2	570.821	0.9665	VNVPGSQAQLK	1553.32	748.882	364.595	4891.39	6365.79
P02751	FINC	Fibronectin OS=Homo sapiens GN=FN1 PE=1 SV=4	2	403.707	0.9663	IGDTWSK	11041.2	8294.52	14085.1	12644.1	13038.7
P27824	CALX	Calnexin OS=Homo sapiens GN=CANX PE=1 SV=2	2	420.212	0.9663	TGIYEEK	39126.7	25117.3	47875.6	42512.2	46242.5
P07942	LAMB1	Laminin subunit beta-1 OS=Homo sapiens GN=LAMB1 PE=1 SV=2	2	488.741	0.9661	IEDPYSPR	3980.55	4886.71	3878.36	3080.5	3120.05
P05556	ITB1	Integrin beta-1 OS=Homo sapiens GN=ITGB1 PE=1 SV=2	2	548.798	0.9658	LSEGVTISYK	706.568	1311.6	20649.5	475.887	1483.85
Q14247	SRC8	Src substrate cortactin OS=Homo sapiens GN=CTTN PE=1 SV=2	2	459.204	0.965	DYSSGFGGK	8113.66	4694.7	9056.53	6983.28	8666.82
P08962	CD63	CD63 antigen OS=Homo sapiens GN=CD63 PE=1 SV=2	2	370.176	0.965	MQADFK	3918.7	2382.77	3905.69	2476.04	9484.57
Q9Y4L1	HYOU1	Hypoxia up-regulated protein 1 OS=Homo sapiens GN=HYOU1 PE=1 SV=1	2	567.796	0.9647	TLGGLEMELR	3038.72	684.323	1111.37	19114.2	140.34
O00584	RNT2	Ribonuclease T2 OS=Homo sapiens GN=RNASET2 PE=1 SV=2	2	572.336	0.9647	ELDLNSVLLK	73.9652	88.8475	219.445	96.8171	37731.9
P10606	COX5B	Cytochrome c oxidase subunit 5B, mitochondrial OS=Homo sapiens GN=COX5B PE=1 SV=2	3	438.92	0.9644	KGLDPYNVLAPK	1336.83	6467.13	31.6499	121.35	27.0407
P10606	COX5B	Cytochrome c oxidase subunit 5B, mitochondrial OS=Homo sapiens GN=COX5B PE=1 SV=2	2	388.224	0.9643	EIMLAAK	6222.3	2381.51	4144.78	3082.92	9541.29
P02751	FINC	Fibronectin OS=Homo sapiens GN=FN1 PE=1 SV=4	4	726.564	0.964	GFNCESKPEAEETCFDKYTGNTYR	377.448	1410.24	349.992	80631.5	280.971
P10599	THIO	Thioredoxin OS=Homo sapiens GN=TXN PE=1 SV=3	2	611.277	0.9638	CMPTFQFFK	5.73657	20.9541	43549.4	297.144	718.132
P21912	SDHB	Succinate dehydrogenase [ubiquinone] iron-sulfur subunit, mitochondrial OS=Homo sapiens GN=SDHB PE=1 SV=3	2	569.8	0.9635	LQDPFSLYR	243.179	143.895	393.085	36230.1	1809.72
P02787	TRFE	Serotransferrin OS=Homo sapiens GN=TF PE=1 SV=3	4	373.696	0.963	SKEFQLFSSPHGK	28640.8	9.50261	5330.57	419.87	774.691
P14625	ENPL	Endoplasmin OS=Homo sapiens GN=HSP90B1 PE=1 SV=1	3	515.616	0.963	ELISNASDALDKIR	5.15227	17.7742	172.967	27979.6	7.10065
P00505	AATM	Aspartate aminotransferase, mitochondrial OS=Homo sapiens GN=GOT2 PE=1 SV=3	2	515.817	0.9622	TQLVSNLKK	5956.16	5291.4	4810.95	5760.31	4773
P14625	ENPL	Endoplasmin OS=Homo sapiens GN=HSP90B1 PE=1 SV=1	2	1023.54	0.962	LISLTDENALSGNEELTVK	96649.3	4339.43	233.836	2459.92	1955.31
P17931	LEG3	Galectin-3 OS=Homo sapiens GN=LGALS3 PE=1 SV=5	2	431.744	0.9616	IALDFQR	1572.67	2120.23	69272.7	19880.1	9960.47
Q12864	CAD17	Cadherin-17 OS=Homo sapiens GN=CDH17 PE=2 SV=3	3	593.663	0.9615	KPLDFETAAVSNIVFK	33.2398	0	20132.2	297.348	563.694
P02751	FINC	Fibronectin OS=Homo sapiens GN=FN1 PE=1 SV=4	3	543.963	0.9608	VDVIPVNLPGEHGQR	1239.75	715.449	8358.89	60094.2	10827.3
P02787	TRFE	Serotransferrin OS=Homo sapiens GN=TF PE=1 SV=3	3	996.445	0.9593	CDEWSVNSVGKIECVSAETTEDCIAK	675.268	31466.9	1440.94	994.612	386.134
P16422	EPCAM	Epithelial cell adhesion molecule OS=Homo sapiens GN=EPCAM PE=1 SV=2	2	660.831	0.9591	LAVNCFVNNNR	1338.47	2945.95	25986.9	43150.3	215574
Q9P2E9	RRBP1	Ribosome-binding protein 1 OS=Homo sapiens GN=RRBP1 PE=1 SV=4	2	432.219	0.9587	QQLSEMK	2960.91	1004.81	1054.05	776.31	2153.98
P02751	FINC	Fibronectin OS=Homo sapiens GN=FN1 PE=1 SV=4	3	683.284	0.9585	GFNCESKPEAEETCFDK	0	9075.16	0	0	0
P00505	AATM	Aspartate aminotransferase, mitochondrial OS=Homo sapiens GN=GOT2 PE=1 SV=3	2	765.905	0.9574	ASAELALGENSEVLK	33874.5	1745.2	999.194	5555.6	812.875
Q92896	GSLG1	Golgi apparatus protein 1 OS=Homo sapiens GN=GLG1 PE=1 SV=2	3	666.686	0.9562	ADIFVDPVLHTACALDIK	1046.56	14417.2	7670.34	5070.71	859.402
P05023	AT1A1	Sodium\potassium-transporting ATPase subunit alpha-1 OS=Homo sapiens GN=ATP1A1 PE=1 SV=1	2	642.86	0.9549	NMVPQQALVIR	18455.3	36703.8	1634.05	1327.84	2068.36
P27824	CALX	Calnexin OS=Homo sapiens GN=CANX PE=1 SV=2	2	388.229	0.9549	GLVLMSR	17156.3	5051.95	4311.39	3790.26	4042.94
P02751	FINC	Fibronectin OS=Homo sapiens GN=FN1 PE=1 SV=4	2	678.353	0.9545	IYLYTLNDNAR	51610.7	67397.5	27287.7	2079.3	2198.13
P27797	CALR	Calreticulin OS=Homo sapiens GN=CALR PE=1 SV=1	3	840.407	0.9544	IDNSQVESGSLEDDWDFLPPKK	20365.6	3740.83	53784.1	122744	8585.01
Q15084	PDIA6	Protein disulfide-isomerase A6 OS=Homo sapiens GN=PDIA6 PE=1 SV=1	3	786.064	0.9543	GSTAPVGGGAFPTIVEREPWDGR	1225.68	563.069	51523.8	8607.38	5558.37
O43852	CALU	Calumenin OS=Homo sapiens GN=CALU PE=1 SV=2	3	431.885	0.9542	MADKDGDLIATK	2819.06	2006.02	3237.43	2647.14	1764.6
P07237	PDIA1	Protein disulfide-isomerase OS=Homo sapiens GN=P4HB PE=1 SV=3	2	494.75	0.9536	KEECPAVR	2556.27	2627.8	2207.48	1814.12	1926.52
P10599	THIO	Thioredoxin OS=Homo sapiens GN=TXN PE=1 SV=3	2	629.85	0.9535	EKLEATINELV	148.605	164.515	25773.7	1751.5	385.631
P02787	TRFE	Serotransferrin OS=Homo sapiens GN=TF PE=1 SV=3	2	606.278	0.9534	DSGFQMNQLR	7495.76	516.991	578.493	311.627	684.988
P08174	DAF	Complement decay-accelerating factor OS=Homo sapiens GN=CD55 PE=1 SV=4	2	515.241	0.953	SCPNPGEIR	3643.14	967.222	12678.1	221.395	2228.14
Q14739	LBR	Lamin-B receptor OS=Homo sapiens GN=LBR PE=1 SV=2	2	481.769	0.9528	TFEVTPIR	9329.93	16920.9	1351.94	3844.58	1899.22
Q8TDB8	GTR14	Solute carrier family 2, facilitated glucose transporter member 14 OS=Homo sapiens GN=SLC2A14 PE=2 SV=1	2	388.245	0.9527	FLLLNR	789.016	167.834	137761	16715.8	571.581
Q02413	DSG1	Desmoglein-1 OS=Homo sapiens GN=DSG1 PE=1 SV=2	3	619.989	0.9516	ALNSMGQDLERPLELR	344.431	58.4831	1655.97	1913.93	22302.1
Q9P2E9	RRBP1	Ribosome-binding protein 1 OS=Homo sapiens GN=RRBP1 PE=1 SV=4	3	682.36	0.9501	KADSVANQGTKVEGITNQGK	1889.52	14571.3	439.202	345.669	566.359
P15328	FOLR1	Folate receptor alpha OS=Homo sapiens GN=FOLR1 PE=1 SV=3	2	471.777	0.9496	VLNVPLCK	4852	2832.49	548.265	4010.31	0.290472
Q9P2E9	RRBP1	Ribosome-binding protein 1 OS=Homo sapiens GN=RRBP1 PE=1 SV=4	2	970.973	0.9494	TLVSTVGSMVFNEGEAQR	216466	515.496	3211.73	3068.95	12877.4
Q9P2E9	RRBP1	Ribosome-binding protein 1 OS=Homo sapiens GN=RRBP1 PE=1 SV=4	3	487.272	0.9488	LKELESQVSGLEK	362.772	0	20277.9	1417.64	1760.11
P02787	TRFE	Serotransferrin OS=Homo sapiens GN=TF PE=1 SV=3	3	426.217	0.9483	EFQLFSSPHGK	29.8913	51956	325.559	67.1936	147.134
P02787	TRFE	Serotransferrin OS=Homo sapiens GN=TF PE=1 SV=3	2	379.239	0.9476	AVGNLRK	35157	20766.4	3080.65	1060.43	1372.01
P07237	PDIA1	Protein disulfide-isomerase OS=Homo sapiens GN=P4HB PE=1 SV=3	4	433.235	0.9476	LGETYKDHENIVIAK	17314.9	13341.3	9049.69	6222.27	1246.27
Q13162	PRDX4	Peroxiredoxin-4 OS=Homo sapiens GN=PRDX4 PE=1 SV=1	2	613.35	0.9472	QITLNDLPVGR	3527.99	7796.66	1564.96	1262.72	2535.47
P05023	AT1A1	Sodium\potassium-transporting ATPase subunit alpha-1 OS=Homo sapiens GN=ATP1A1 PE=1 SV=1	2	385.693	0.9463	IMESFK	5616.31	9363.89	10059.8	8763.85	10099.1
Q07065	CKAP4	Cytoskeleton-associated protein 4 OS=Homo sapiens GN=CKAP4 PE=1 SV=2	2	445.255	0.9462	LSSLDNLK	4407.6	3259.66	4657.09	4009.84	4184.26
P08574	CY1	Cytochrome c1, heme protein, mitochondrial OS=Homo sapiens GN=CYC1 PE=1 SV=3	3	894.07	0.9451	ELAAEVEVQDGPNEDGEMFMRPGK	773.046	4354.44	7290.62	2360.83	96268
P27824	CALX	Calnexin OS=Homo sapiens GN=CANX PE=1 SV=2	2	396.227	0.9449	GLVLMSR	238.976	101.947	2091.36	174.185	25932.6
P30533	AMRP	Alpha-2-macroglobulin receptor-associated protein OS=Homo sapiens GN=LRPAP1 PE=1 SV=1	2	390.717	0.9448	YGLDGKK	3752.94	3078.58	3041.45	4506.81	2399.46
P14625	ENPL	Endoplasmin OS=Homo sapiens GN=HSP90B1 PE=1 SV=1	2	520.726	0.9447	EVEEDEYK	6853.68	6091.23	9773.07	6840.99	12369.8
P27824	CALX	Calnexin OS=Homo sapiens GN=CANX PE=1 SV=2	3	591.939	0.9442	YDGKWEVEEMKESK	8975.55	18098.8	838.609	7855.44	118.539
P08174	DAF	Complement decay-accelerating factor OS=Homo sapiens GN=CD55 PE=1 SV=4	2	515.244	0.9425	SCPNPGEIR	28752.7	19373.5	52878.2	37652.5	57729.7
P02751	FINC	Fibronectin OS=Homo sapiens GN=FN1 PE=1 SV=4	3	842.128	0.942	DLEVVAATPTSLLISWDAPAVTVR	8953.36	41.2872	156.251	291.038	93.6756
Q06481	APLP2	Amyloid-like protein 2 OS=Homo sapiens GN=APLP2 PE=1 SV=2	4	549.533	0.942	MALENYLAALQSDPPRPHR	702.281	7526.84	501.625	262.88	2084.96
Q12864	CAD17	Cadherin-17 OS=Homo sapiens GN=CDH17 PE=2 SV=3	3	614.993	0.9417	LGVDTDPHTNTGYVIIK	42432.9	3960.65	1471.69	8382.99	4078.43
P08574	CY1	Cytochrome c1, heme protein, mitochondrial OS=Homo sapiens GN=CYC1 PE=1 SV=3	2	455.727	0.9413	DVCTFLR	12430.5	9135.2	1519.57	17219.4	364.689
P16615	AT2A2	Sarcoplasmic\endoplasmic reticulum calcium ATPase 2 OS=Homo sapiens GN=ATP2A2 PE=1 SV=1	3	514.907	0.9411	SMSVYCTPNKPSR	569.44	7989.84	314.767	1778.79	199.302
P02649	APOE	Apolipoprotein E OS=Homo sapiens GN=APOE PE=1 SV=1	2	480.742	0.9403	DADDLQKR	63.9144	373.908	1930.06	1060.47	1618.76
P02649	APOE	Apolipoprotein E OS=Homo sapiens GN=APOE PE=1 SV=1	2	422.739	0.9392	WELALGR	624.05	68.0793	1221.1	9276.28	5965.41
P08195	4F2	4F2 cell-surface antigen heavy chain OS=Homo sapiens GN=SLC3A2 PE=1 SV=3	2	602.342	0.9388	VILDLTPNYR	49854.9	1433.19	8123.44	4191.22	11016.8
P53621	COPA	Coatomer subunit alpha OS=Homo sapiens GN=COPA PE=1 SV=2	2	360.706	0.9386	FAVLDR	419.155	2314.91	146.052	475.658	216.593
Q9P2E9	RRBP1	Ribosome-binding protein 1 OS=Homo sapiens GN=RRBP1 PE=1 SV=4	3	627.651	0.9384	NTDVAQSPEAPKQEAPAK	13642.1	29389.5	8592.51	16335.4	4894.04
Q14247	SRC8	Src substrate cortactin OS=Homo sapiens GN=CTTN PE=1 SV=2	4	373.693	0.938	TEKHESQKDYVK	2161.22	1755.87	491.911	1691.66	259.206
P06703	S10A6	Protein S100-A6 OS=Homo sapiens GN=S100A6 PE=1 SV=1	2	458.249	0.9378	LQDAEIAR	4056.09	2545.71	8904.34	5903.47	10711.6
P16422	EPCAM	Epithelial cell adhesion molecule OS=Homo sapiens GN=EPCAM PE=1 SV=2	2	382.204	0.9372	YQLDPK	14155.2	10054.8	22802.3	19239.1	24293.6
Q8TDB8	GTR14	Solute carrier family 2, facilitated glucose transporter member 14 OS=Homo sapiens GN=SLC2A14 PE=2 SV=1	2	388.246	0.9358	FLLINR	10913	65552	2123.85	4133.05	1806.72
P07237	PDIA1	Protein disulfide-isomerase OS=Homo sapiens GN=P4HB PE=1 SV=3	2	671.324	0.9357	NFEDVAFDEKK	3410.79	323.89	5285.73	1435.16	30159.3
P05556	ITB1	Integrin beta-1 OS=Homo sapiens GN=ITGB1 PE=1 SV=2	2	492.263	0.9354	IGFGSFVEK	100.592	2861.17	1252.09	17182.3	2561.06
P16615	AT2A2	Sarcoplasmic\endoplasmic reticulum calcium ATPase 2 OS=Homo sapiens GN=ATP2A2 PE=1 SV=1	3	797.45	0.935	AKDIVPGDIVEIAVGDKVPADIR	14171.9	17692.6	563.042	6944.9	1103.66
Q96AG4	LRC59	Leucine-rich repeat-containing protein 59 OS=Homo sapiens GN=LRRC59 PE=1 SV=1	3	579.659	0.9348	WLDLKDNPLDPVLAK	13983.5	782.164	532.853	1671.79	379.263
P07237	PDIA1	Protein disulfide-isomerase OS=Homo sapiens GN=P4HB PE=1 SV=3	2	404.733	0.9338	TLDGFKK	348.704	29.9334	3589.43	132.492	1399.72
Q12864	CAD17	Cadherin-17 OS=Homo sapiens GN=CDH17 PE=2 SV=3	3	590.314	0.9334	IDHVTGEIFSVAPLDR	1572.25	1153	6772.92	35830.8	2682.09
P02649	APOE	Apolipoprotein E OS=Homo sapiens GN=APOE PE=1 SV=1	3	472.257	0.9333	LDEVKEQVAEVR	1072.04	44.3311	12984.6	210.852	486.04
Q14315	FLNC	Filamin-C OS=Homo sapiens GN=FLNC PE=1 SV=3	2	500.286	0.9327	HIGISFTPK	2283.56	5891.7	82.7409	1372.74	67.0238
Q06481	APLP2	Amyloid-like protein 2 OS=Homo sapiens GN=APLP2 PE=1 SV=2	2	550.752	0.9311	FIYGGCGGNR	47.6917	297.112	4539.91	181.178	192.641
P27797	CALR	Calreticulin OS=Homo sapiens GN=CALR PE=1 SV=1	3	840.407	0.9307	IDNSQVESGSLEDDWDFLPPKK	7760.07	1122.09	136828	3962.99	18347.9
Q8TCJ2	STT3B	Dolichyl-diphosphooligosaccharide--protein glycosyltransferase subunit STT3B OS=Homo sapiens GN=STT3B PE=1 SV=1	2	738.328	0.9307	ESDYFTPQGEFR	22.5469	7274.49	104.13	418.27	95.778
Q9P2E9	RRBP1	Ribosome-binding protein 1 OS=Homo sapiens GN=RRBP1 PE=1 SV=4	3	992.562	0.9303	APAVAVAPTPVQPPIIVAPVATVPAMPQEK	464.798	40529.4	0	19.2256	0
P05023	AT1A1	Sodium\potassium-transporting ATPase subunit alpha-1 OS=Homo sapiens GN=ATP1A1 PE=1 SV=1	3	647.363	0.9301	QGAIVAVTGDGVNDSPALKK	2529.18	1063.67	30244.8	10943.1	507.846
P07237	PDIA1	Protein disulfide-isomerase OS=Homo sapiens GN=P4HB PE=1 SV=3	2	485.773	0.9289	QLAPIWDK	149.803	9112.53	56.1314	2959.62	171.738
P16422	EPCAM	Epithelial cell adhesion molecule OS=Homo sapiens GN=EPCAM PE=1 SV=2	4	728.092	0.9281	RAKPEGALQNNDGLYDPDCDESGLFK	1470.16	751.56	6346.21	58295.6	704.72
Q99470	SDF2	Stromal cell-derived factor 2 OS=Homo sapiens GN=SDF2 PE=1 SV=2	3	542.615	0.9269	AMEGIFMKPSELLK	1863.96	67.9876	2439.17	26349.2	2972.11
P27824	CALX	Calnexin OS=Homo sapiens GN=CANX PE=1 SV=2	2	396.227	0.9246	GLVLMSR	1.48275	416.963	21075.3	591.995	4344.9
P21912	SDHB	Succinate dehydrogenase [ubiquinone] iron-sulfur subunit, mitochondrial OS=Homo sapiens GN=SDHB PE=1 SV=3	2	604.754	0.9244	CHTIMNCTR	551.684	1490.68	1369.17	1568.6	336.748
P02786	TFR1	Transferrin receptor protein 1 OS=Homo sapiens GN=TFRC PE=1 SV=2	2	437.275	0.9243	LTVSNVLK	14041.6	8281.86	254.327	1901.44	116.78
P11169	GTR3	Solute carrier family 2, facilitated glucose transporter member 3 OS=Homo sapiens GN=SLC2A3 PE=2 SV=1	2	517.29	0.924	SVEMLILGR	147.299	234.491	1831.96	24005.7	20288.5
P35232	PHB	Prohibitin OS=Homo sapiens GN=PHB PE=1 SV=1	2	575.3	0.9239	FDAGELITQR	1041.32	755.594	13868.6	4110.8	12490.8
Q9P2E9	RRBP1	Ribosome-binding protein 1 OS=Homo sapiens GN=RRBP1 PE=1 SV=4	2	906.468	0.9238	TLQEQLENGPNTQLAR	223.704	835.286	29162.4	0	83.8768
Q06481	APLP2	Amyloid-like protein 2 OS=Homo sapiens GN=APLP2 PE=1 SV=2	3	487.263	0.9237	QTLIQHFQAMVK	684.979	17.1031	402.477	19362.2	226.407
P07237	PDIA1	Protein disulfide-isomerase OS=Homo sapiens GN=P4HB PE=1 SV=3	2	726.356	0.9231	YKPESEELTAER	3398.97	10764.1	8793.66	7360.51	62771.3
Q06481	APLP2	Amyloid-like protein 2 OS=Homo sapiens GN=APLP2 PE=1 SV=2	3	487.264	0.9231	QTLIQHFQAMVK	404.546	7.65117	39114.8	176.439	5039.62
Q07157	ZO1	Tight junction protein ZO-1 OS=Homo sapiens GN=TJP1 PE=1 SV=3	3	700.709	0.9227	LAGGNDVGIFVAGVLEDSPAAK	8050.73	728.015	14015.7	1702.13	10887.5
Q06481	APLP2	Amyloid-like protein 2 OS=Homo sapiens GN=APLP2 PE=1 SV=2	3	529.952	0.9213	VKKEWEEAELQAK	3776.9	4171.18	1218.57	4660.85	1842.71
Q92542	NICA	Nicastrin OS=Homo sapiens GN=NCSTN PE=1 SV=2	2	485.273	0.9211	APDVTTLPR	4832.96	4529.03	7046.28	7715.51	522.408
Q53GQ0	DHB12	Very-long-chain 3-oxoacyl-CoA reductase OS=Homo sapiens GN=HSD17B12 PE=1 SV=2	4	464.773	0.9208	IRKPTLDKPSPETFVK	3159.25	9994.61	1317.91	803.437	387.447
P08195	4F2	4F2 cell-surface antigen heavy chain OS=Homo sapiens GN=SLC3A2 PE=1 SV=3	3	1070.52	0.9164	DDVAQTDLLQIDPNFGSKEDFDSLLQSAK	874.243	11477.7	491.247	337.944	670.119
O95994	AGR2	Anterior gradient protein 2 homolog OS=Homo sapiens GN=AGR2 PE=1 SV=1	3	423.551	0.9153	HLSPDGQYVPR	9911.23	7141.94	1899.73	6178.69	607.982
O43169	CYB5B	Cytochrome b5 type B OS=Homo sapiens GN=CYB5B PE=1 SV=2	2	376.702	0.915	VYDVTR	6602.74	4271.2	10618.1	8629.55	15852.5
P07602	SAP	Prosaposin OS=Homo sapiens GN=PSAP PE=1 SV=2	2	574.781	0.9143	GSAVWCQNVK	1350.61	476.397	1068.77	4888.47	19214.8
Q9Y4L1	HYOU1	Hypoxia up-regulated protein 1 OS=Homo sapiens GN=HYOU1 PE=1 SV=1	2	465.769	0.9141	AVGKEELGK	5724.89	3478.52	5837.92	4937.63	4674.72
Q9P2E9	RRBP1	Ribosome-binding protein 1 OS=Homo sapiens GN=RRBP1 PE=1 SV=4	2	465.257	0.9131	EVQQLQGK	1800.56	3088.08	2804.34	2051.91	2355.52
P02786	TFR1	Transferrin receptor protein 1 OS=Homo sapiens GN=TFRC PE=1 SV=2	2	657.828	0.9123	LAQMFSDMVLK	25423.6	20863.7	5880.85	7652.1	7766.37
Q06481	APLP2	Amyloid-like protein 2 OS=Homo sapiens GN=APLP2 PE=1 SV=2	4	549.533	0.9117	MALENYLAALQSDPPRPHR	0	0	211.113	10311.8	1418.6
Q96HS1	PGAM5	Serine\threonine-protein phosphatase PGAM5, mitochondrial OS=Homo sapiens GN=PGAM5 PE=1 SV=2	2	508.773	0.9076	EQAELTGLR	14129.6	8029.32	9355.13	9385.17	8369.15
P14625	ENPL	Endoplasmin OS=Homo sapiens GN=HSP90B1 PE=1 SV=1	2	482.298	0.9012	LIINSLYK	27.9123	148.492	6.05415	29373.6	0.590411
P17931	LEG3	Galectin-3 OS=Homo sapiens GN=LGALS3 PE=1 SV=5	3	499.931	0.9012	QSVFPFESGKPFK	12.6534	0.305705	48426.8	76.9916	5223.96
P07237	PDIA1	Protein disulfide-isomerase OS=Homo sapiens GN=P4HB PE=1 SV=3	2	541.339	0.8975	THILLFLPK	4018.77	7976.44	5518.51	3293.66	6460.05
P62937	PPIA	Peptidyl-prolyl cis-trans isomerase A OS=Homo sapiens GN=PPIA PE=1 SV=2	2	647.794	0.8975	EGMNIVEAMER	15495.6	9482.73	4704.69	1176.94	684.834
P05556	ITB1	Integrin beta-1 OS=Homo sapiens GN=ITGB1 PE=1 SV=2	2	541.726	0.897	GICECGVCK	3541.31	1965.67	6353.18	3612.02	7977.05
P02751	FINC	Fibronectin OS=Homo sapiens GN=FN1 PE=1 SV=4	3	477.922	0.8951	WSRPQAPITGYR	27818	350.746	843.423	1521.04	836.979
P00505	AATM	Aspartate aminotransferase, mitochondrial OS=Homo sapiens GN=GOT2 PE=1 SV=3	3	465.95	0.8935	IAAAILNTPDLRK	0	10385.1	0	164.261	0
Q07065	CKAP4	Cytoskeleton-associated protein 4 OS=Homo sapiens GN=CKAP4 PE=1 SV=2	2	352.714	0.8905	LTELTK	1801.8	1378.64	2927.91	2336.78	3733.93
P02787	TRFE	Serotransferrin OS=Homo sapiens GN=TF PE=1 SV=3	2	554.805	0.8896	SETKDLLFR	16975.1	10269.3	225.301	343.899	60.6174
Q07065	CKAP4	Cytoskeleton-associated protein 4 OS=Homo sapiens GN=CKAP4 PE=1 SV=2	2	737.396	0.8884	SVGELPSTVESLQK	18872.5	460.235	11328.7	6116.38	376.938
P02751	FINC	Fibronectin OS=Homo sapiens GN=FN1 PE=1 SV=4	4	953.213	0.8878	AAVYQPQPHPQPPPYGHCVTDSGVVYSVGMQWLK	21475.2	486.325	534.115	3689.4	6038.55
P62491	RB11A	Ras-related protein Rab-11A OS=Homo sapiens GN=RAB11A PE=1 SV=3	2	637.812	0.8876	AQIWDTAGQER	6765.21	52984.6	60.8431	3890.26	297.486
P16615	AT2A2	Sarcoplasmic\endoplasmic reticulum calcium ATPase 2 OS=Homo sapiens GN=ATP2A2 PE=1 SV=1	2	704.851	0.885	IGIFGQDEDVTSK	3021.28	24778.3	3146.06	1467.64	4818.95
P07339	CATD	Cathepsin D OS=Homo sapiens GN=CTSD PE=1 SV=1	2	521.83	0.8785	VSTLPAITLK	1151.08	4.4456	262.3	15580.2	0
P07237	PDIA1	Protein disulfide-isomerase OS=Homo sapiens GN=P4HB PE=1 SV=3	4	609.319	0.875	IKPHLMSQELPEDWDKQPVK	1747.61	650.71	8227.07	61147.7	2405.13
P23284	PPIB	Peptidyl-prolyl cis-trans isomerase B OS=Homo sapiens GN=PPIB PE=1 SV=2	2	406.72	0.8735	VYFDLR	4160.94	2946.9	442.305	2256.68	578.158
P27824	CALX	Calnexin OS=Homo sapiens GN=CANX PE=1 SV=2	2	396.226	0.8732	GLVLMSR	18431.2	18252	19959.3	20107.6	11662.6

## Sheet: MSstats
Protein	log2 fold change	log 2 adj.pvalue
4F2	-1.16289	5.18628
A4	0.848501	4.45067
AAAT	0.0711027	0.0806667
AATM	1.39333	4.70412
ACSL3	-3.72879	3.75189
ADAS	-5.49277	1.41974
ADT1	-1.34803	1.81224
ADT2	0.167544	0.207334
AGR2	-1.42397	4.02116
AMRP	-0.403484	0.845993
ANXA2	-0.159025	0.367701
APLP2	-0.0379821	0.0806667
APOD	1.81795	3.60335
APOE	2.50388	19.5083
AT12A	2.59576	1.22329
AT1A1	-1.05057	4.73808
AT1B1	-2.04698	0.526908
AT2A1	-3.61752	1.20787
AT2A2	-2.07774	10.2227
AT2A3	-1.39006	1.27797
CAD17	1.21919	8.4127
CADH1	0.579032	1.28575
CADM1	4.39068	4.36611
CALR	-0.0470463	0.0806667
CALU	0.0506523	0.0806667
CALX	0.219395	0.654664
CATB	-2.57218	1.40878
CATD	0.896663	0.503205
CD276	-1.0093	0.457993
CD63	-1.3948	0.641031
CDC42	-0.240561	0.086427
CKAP4	0.583397	1.35161
CLIC1	0.777276	1.22329
CMC2	-1.18516	1.60259
COPA	-2.20036	6.44188
COX2	-1.09528	0.474069
COX5A	1.57688	3.24557
COX5B	0.895672	1.22329
CTNA2	2.86264	3.75189
CTND1	-2.5007	1.22329
CY1	2.20299	4.66617
CYB5B	-0.192904	0.0806667
DAF	0.583944	1.22329
DAG1	0.787466	2.25451
DBNL	-0.126736	0.207334
DCD	1.74071	2.17635
DHB12	-2.30669	2.05313
DHCR7	-0.788379	1.04743
DKK1	0.363598	1.04743
DPP4	-1.10287	2.20237
DSC1	-2.9266	4.70412
DSG1	-1.22598	0.474069
ENPL	-0.116864	0.207334
EPCAM	0.84794	1.90891
ESXA	8.20631	14.8838
FINC	-0.00345774	0.0206209
FLNC	-2.84739	8.4127
FOLR1	-2.87377	1.04743
G6PI	-0.415098	0.271154
GANAB	-2.55557	6.63732
GLU2B	-0.137741	0.207334
GRN	-0.0406618	0.271154
GSLG1	0.674079	1.60259
GTR1	0.110177	0.0806667
GTR14	1.56566	3.75189
GTR3	0.692862	1.20787
HM13	2.15731	2.25451
HYOU1	-0.0621354	0.0806667
ITB1	-0.52626	0.845993
JAM1	2.08456	8.4127
LAMA5	-1.60517	3.60335
LAMB1	-0.787303	0.457993
LAMP1	0.551461	1.05694
LAP2B	-2.61358	1.85743
LBR	-1.04034	1.04743
LEG3	0.816162	1.1593
LMAN2	-0.583403	1.05694
LRC59	-0.548797	0.474069
LSR	0.917556	1.85743
MARCS	2.53462	2.05313
MCP	1.62044	0.583917
MDR1	-3.49875	4.34547
MIC60	-7.77258	1.60259
MIF	2.49072	5.0053
MPCP	-0.822131	2.09538
MRP	1.25751	6.36219
MYOF	-2.35384	10.2948
NCPR	-1.21673	1.90891
NHRF1	-0.870207	0.845993
NICA	0.159832	0.0806667
NU155	-2.30922	2.77956
NUCB1	0.728405	1.20787
PDIA1	-1.40397	15.2631
PDIA6	-0.157477	0.641031
PGAM5	-1.9474	1.81224
PHB	1.55695	0.641031
PODXL	0.609618	1.81224
PPIA	-0.222141	0.474069
PPIB	-0.917697	1.85743
PRDX4	-2.50221	8.35094
RAB7A	0.793878	0.474069
RB11A	-6.34662	1.88587
RCN1	-0.56582	0.367701
RNT2	-0.335342	0.24958
RPN1	-1.72459	8.35094
RPN2	-1.99094	1.23943
RRBP1	-1.52811	14.3188
RRP12	-0.378242	1.13274
S10A6	1.18028	8.30123
S39A7	0.404968	3.60335
SAP	-0.850353	1.22329
SCRB1	2.75576	11.6854
SCRB2	1.07054	1.45471
SDF2	1.45121	2.14763
SDHB	0.523553	1.60259
SERPH	0.0644836	0.0806667
SNAA	-1.39521	1.04858
SPIT1	0.0523148	0.0610685
SRC8	-0.710135	4.45067
STT3A	-2.19506	8.60363
STT3B	0.384305	0.641031
SURF4	-1.3129	1.60416
TECR	-5.29089	3.75189
TFR1	-2.4553	11.6854
THIO	2.03994	3.75189
TM9S2	-1.17365	2.20237
TM9S4	-1.96184	4.69301
TMEDA	2.3364	0.641031
TPR	-2.95537	5.22898
TRFE	-5.3416	50
VDAC1	-1.80618	0.641031
VDAC2	-1.15553	2.09538
YBOX1	-0.151769	0.271154
ZO1	-0.854751	1.80469
