# Supplementary material for: Identification of scavenger receptor B1 as the airway microfold cell receptor for Mycobacterium tuberculosis
Source: eLife. 2020 Mar 5;9:e52551. doi: 10.7554/eLife.52551 (PMC7065847; doi:10.7554/eLife.52551)
Supplement: Supplementary file 3. [file elife-52551-supp3.xls]

## Sheet: Sheet1
Reagent type (species) or resource	Designation	Source or reference	Identifiers	Additional information
Gene (Mycobacterium tuberculosis)	EsxA	BEI Resources	Cat# NR-50170
Gene (M. tuberculosis)	EsxB	BEI Resources	Cat# NR-13297
Strain, strain background (M. tuberculosis)	M. tuberculosis Erdman	BEI Resources	Cat# NR-15404
Strain, strain background (M. tuberculosis)	M. tuberculosis Erdman eccD1::Tn5370	Cox et al., 1999; Stanley et al., 2003	PMID 10573420; 14557536
Strain, strain background (M. tuberculosis)	M. tuberculosis Erdman ΔesxA	Stanley et al., 2007	PMID 17312162
Strain, strain background (M. tuberculosis)	M. tuberculosis Erdman cor::Tn7	Zacharia et al., 2013	PMID 24255121
Chemical compound, drug	Middlebrook 7H9 medium	Fisher	Cat# DF0713-17-9
Chemical compound, drug	Middlebrook 7H11 agar	Thermo	Cat# R454002
Chemical compound, drug	Oleic acid-albumin-dextrose-catalase	Becton Dickiinson Microbiology Systems	Cat# 212351	10% final concentration
Chemical compound, drug	Tween 80	Fisher	Cat# T164-500	Final concentration of 0.05%
Cell line (Homo sapiens)	Human colorectal adenocarcinoma cell line Caco-2	ATCC	Cat# HTB-37; RRID:CVCL_0025
Cell line (Homo sapiens)	Human Burkitt lymphoma cell line Raji B	ATCC	Cat# CCL-86; RRID:CVCL_0511
Cell line (Homo sapiens)	16HBE14o- cells	Forbes et al., 2003; Obtained from Dr. Dieter Gruenert (University of California, San Francisco	RRID:CVCL_0112
Chemical compound, drug	DMEM	Gibco	Cat# 11965092
Chemical compound, drug	Fetal bovine serum	Gibco	Cat# 26140079	0.2
Chemical compound, drug	penicillin	Gibco	Cat# 15140122	50 units/mL
Chemical compound, drug	streptomycin	Gibco	Cat# 15140122	50 μg/mL
Chemical compound, drug	L-glutamine	Gibco	Cat# 25030081	2 mM
Chemical compound, drug	sodium pyruvate	Gibco	Cat# 11360070	0.01
Chemical compound, drug	non-essential amino acids	Gibco	Cat# 11140050	0.01
Chemical compound, drug	HEPES	Hyclone	Cat# SH30237.01	1 mM
Recombinant DNA reagent	pLKO.1	Addgene (Huang et al., 2019)	Cat# 10878
Chemical compound, drug	puromycin	Sigma-Aldrich	Cat# P8833-10MG
Chemical compound, drug	3 μm transwell insert	Corning	Cat# 3462
Chemical compound, drug	PBS	Sigma	Cat# D8537
Recombinant DNA reagent	pENTR entry vector	Thermo	Cat# K240020
Recombinant DNA reagent	pDest17 destination vector	Thermo	Cat# 11803012; 11791020
Commercial assay or kit	Gateway LR Clonase II Enzyme mix	Invitrogen	Cat# 11791020
Strain, strain background (E. coli)	BL21 strain of E. coli	NEB	Cat# C2527I
Chemical compound, drug	IPTG	Promega	Cat# V3955	1 mM
Chemical compound, drug	Sodium phosphate monobasic	Sigma	Cat# S5011-500G	50 mM
Chemical compound, drug	Sodium chloride	Acros Organics	Cat# 42429-0010	500 mM
Chemical compound, drug	EDTA-free protease inhibitor	Roche	Cat# 11836170001
Chemical compound, drug	TALON affinity resin	Clontech	Cat# 635503
Chemical compound, drug	Urea	Sigma	Cat# U5128-5KG	8 M
Chemical compound, drug	Imidazole	Sigma	Cat# I5513-25G	150 mM
Chemical compound, drug	Slide-a-Lyzer dialysis cassette	Thermo	Cat# 66203
Chemical compound, drug	Ammonium bicarbonate	Fisher	Cat# BP2413-500	10 mM
Chemical compound, drug	ASB-14	Sigma	Cat# A1346-1G	0.005
Chemical compound, drug	Paraformaldehyde	Thermo	Cat# 28908
Chemical compound, drug	DAPI	Thermo	Cat# D1306
Chemical compound, drug	Prolong Gold antifade reagent	Invitrogen	Cat# P36390
Other	AxioImager MN microscope	Zeiss
Chemical compound, drug	Sulfo-SBED reagent	Thermo	Cat# 33033
Chemical compound, drug	PD-10 desalting columns	GE Healthcare	Cat# 17-0851-01
Chemical compound, drug	HBSS	Gibco	Cat# 14025-092
Chemical compound, drug	donkey serum	Sigma	Cat# D9663-10ML	0.1
Antibody	rabbit anti-SR-B1 antibody	Abcam	Cat# 52629; RRID:AB_882458	1:100 dilution
Antibody	PE-conjugated rat NKM 16-2-4	Miltenyi	Cat# 130-102-150; RRID:AB_2660295	1:100 dilution
Antibody	AlexaFluor 647 conjugated donkey-anti-rabbit secondary antibody	Thermo	Cat# A-31573; RRID:AB_2536183	1:500 dilution
Antibody	AlexaFluor 488 conjugated streptavidin	Jackson	Cat# 016-540-084; RRID:AB_2337249	1:500 dilution
Commercial assay or kit	Microspheres	Polylink	Cat# 24350-1
Other	LSR II flow cytometer	BD
Commercial assay or kit	TriCEPS reagent	Dualsystems Biotech
Chemical compound, drug	EDTA	Boston BioProducts	Cat# BM-150
Chemical compound, drug	streptavidin-conjugated magnetic beads	Thermo	Cat# 88816
Biological sample (M. musculus)	Mouse NALT sections	Nair et al., 2016
Chemical compound, drug	Xylene	Sigma	Cat# 214736-1L
Chemical compound, drug	Ethanol	Millipore Sigma	Cat# 793183-4X1GA-PB
Antibody	AlexaFluor 568 conjugated goat-anti-mouse secondary antibody	Thermo	Cat# A-11004; RRID:AB_2534072	1:500 dilution
Antibody	HRP conjugated donkey-anti-rabbit secondary antibody	Thermo	Cat# A16023; RRID:AB_2534697	1:500 dilution
Commercial assay or kit	Cy5 tyramide	Perkin Elmer	Cat# SAT705A001EA
Other	AxioImager MN microscope	Zeiss
Biological sample (M. musculus)	BALB/c mice	The Jackson Laboratory	Cat# 000651; RRID:IMSR_JAX:000651
Biological sample (Homo sapiens)	Adenoid samples	Other		See Materials and Methods
Chemical compound, drug	Kanamycin	Fisher	Cat# BP906-5	50 ug/mL
Chemical compound, drug	Ampicillin	Fisher	Cat# BP1760-5	50 ug/mL
Chemical compound, drug	100 μm nylon cell strainer	Corning	Cat# 431752
Chemical compound, drug	ACK (Ammonium-Chloride-Potassium) lysis buffer	Gibco	Cat# A10492-01
Antibody	mouse anti-EpCAM Brilliant Violet 421	Biolegend	Cat# 324219; RRID:AB_11124342	1:100 dilution
Antibody	mouse PE-NKM-16-2-4	Miltenyi	Cat# 130-102-150; RRID:AB_2660295	1:100 dilution
Antibody	AlexaFluor 488 conjugated donkey-anti-rabbit secondary antibody	Thermo	Cat# R37118; RRID:AB_2556546	1:500 dilution
Software, algorithm	FlowJo software	BD	RRID:SCR_008520
Software, algorithm	GraphPad Prism	GraphPad	RRID:SCR_002798	V8
Software, algorithm	Genome Analysis Toolkit	DePristo et al., 2011; McKenna et al., 2010	RRID:SCR_001876	GATK, v3.8-0
Software, algorithm	Trim Galore	https://github.com/FelixKrueger/TrimGalore	RRID:SCR_011847	V0.6.4
Software, algorithm	Burrows-Wheeler Aligner	Li and Durbin, 2009	RRID:SCR_010910	v0.7.17
Software, algorithm	Picard	https://broadinstitute.github.io/picard	RRID:SCR_006525	v2.12.0
Software, algorithm	SAMtool	Li et al., 2009	RRID:SCR_002105	V0.1.19
Software, algorithm	SPAdes	Bankevich et al., 2012	RRID:SCR_000131	v3.13.0
Software, algorithm	MUMmer 4	Kurtz et al., 2004	RRID:SCR_001200
