# Supplementary figures and images for: Эмоциональный интеллект городских школьников
Source: eLife journal article supplement (doi:10.7554/elife.52551), 2014-01-01

# Supplemental Figure 1

**A**

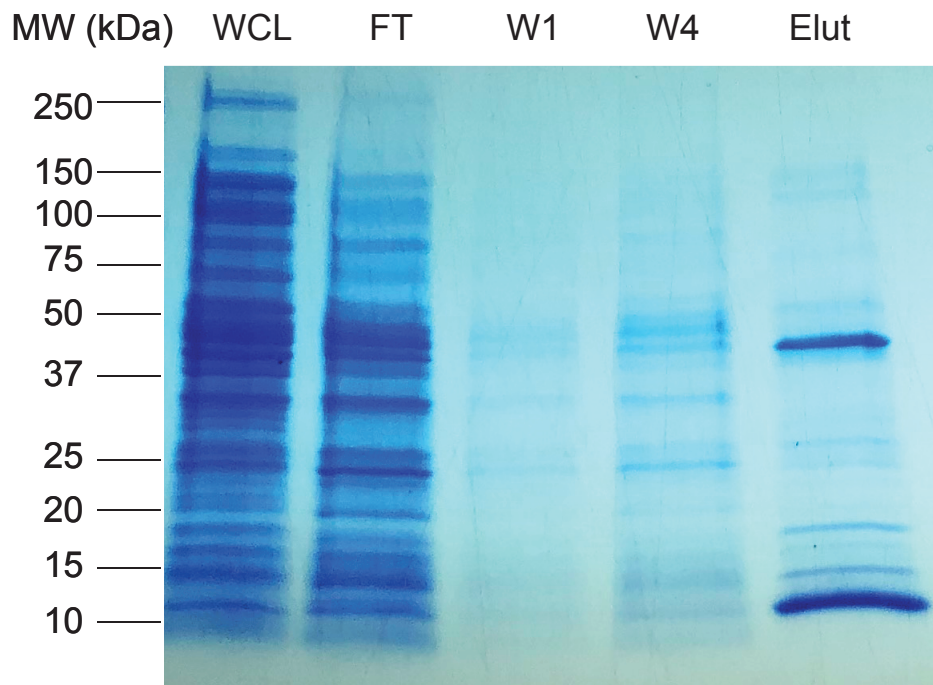

**B**

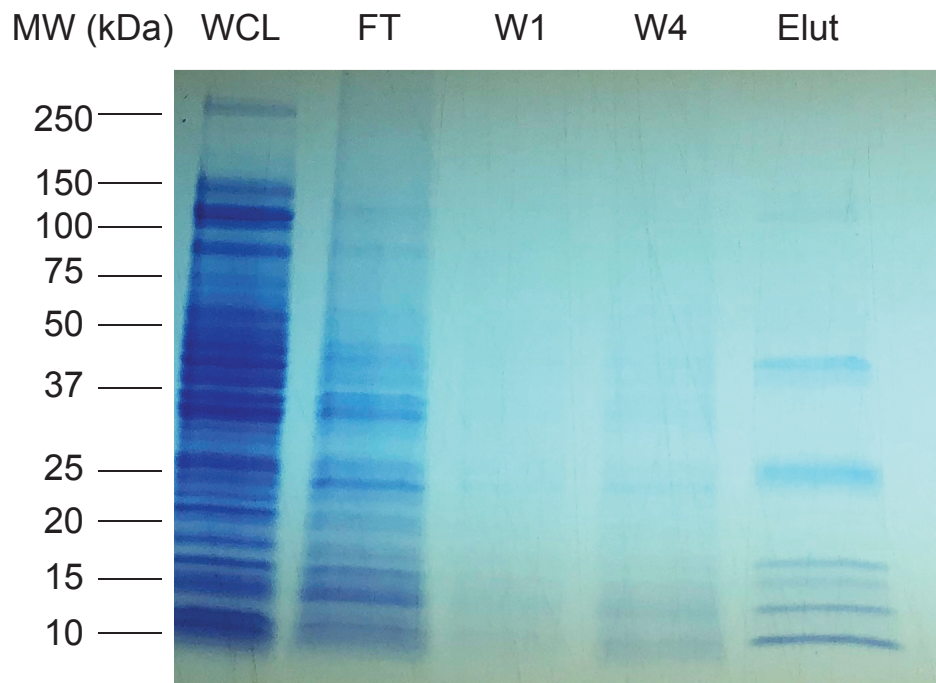

Supplement: supp [file elife_poa_e52551_Figure_2_figure_supplement_1.pdf › elife_poa_e52551_Figure_2_figure_supplement_1.pdf]

# Supplemental Figure 2

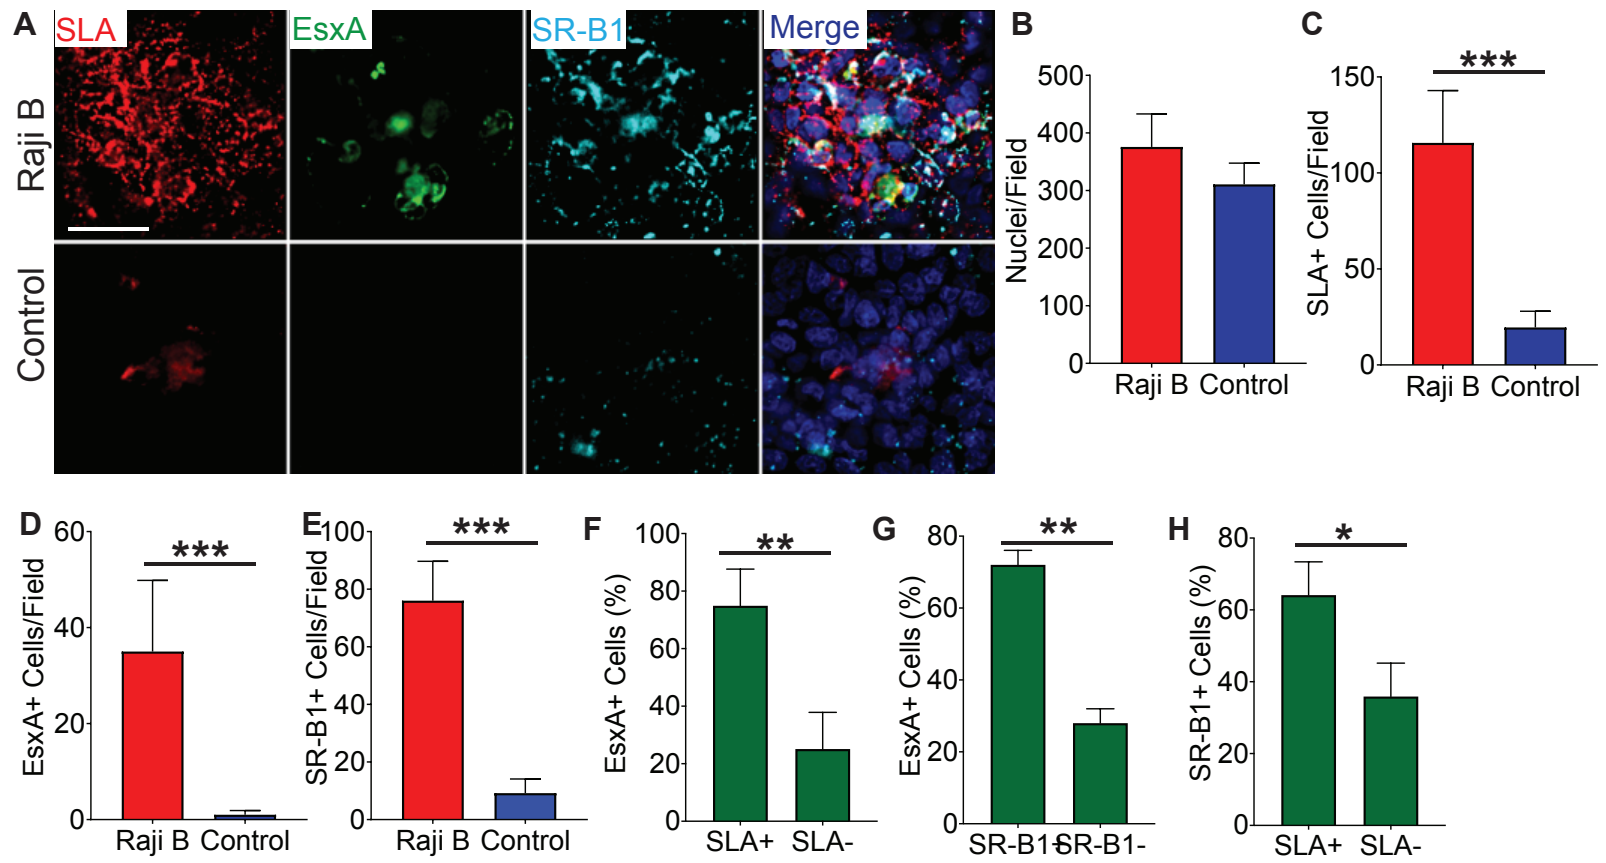

Supplement: supp [file elife_poa_e52551_Figure_2_figure_supplement_2.pdf › elife_poa_e52551_Figure_2_figure_supplement_2.pdf]

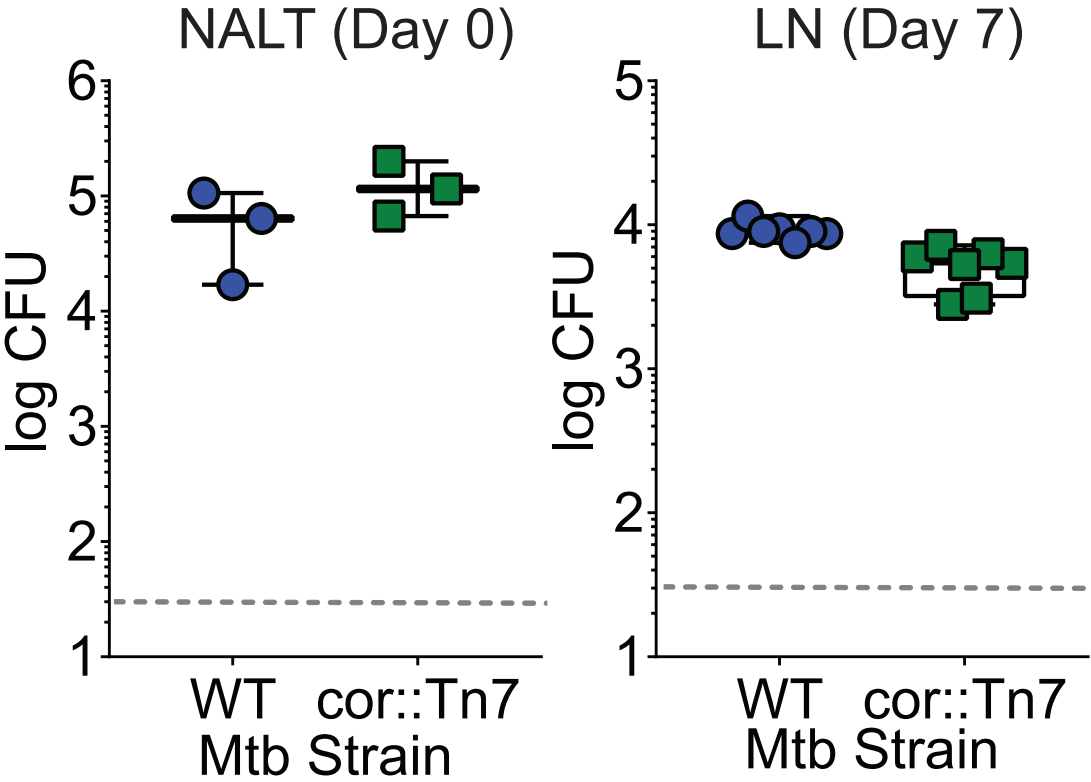

Supplement: supp [file elife_poa_e52551_Figure_5_figure_supplement_1.pdf › elife_poa_e52551_Figure_5_figure_supplement_1.pdf]

# Supplemental Figure 4

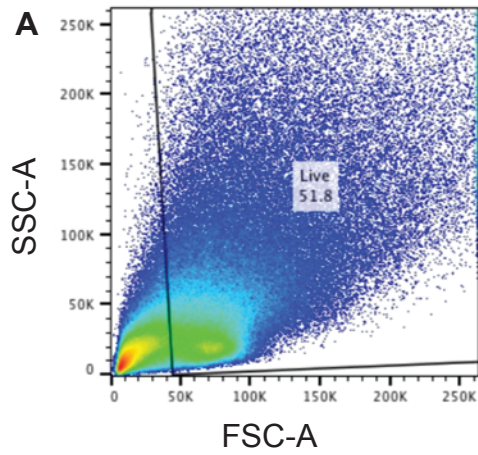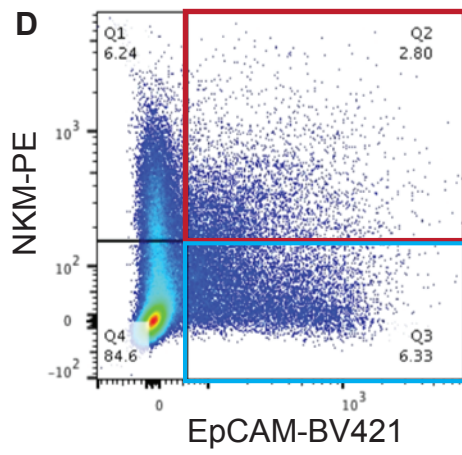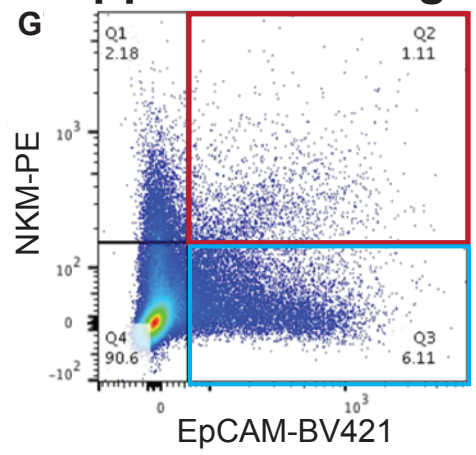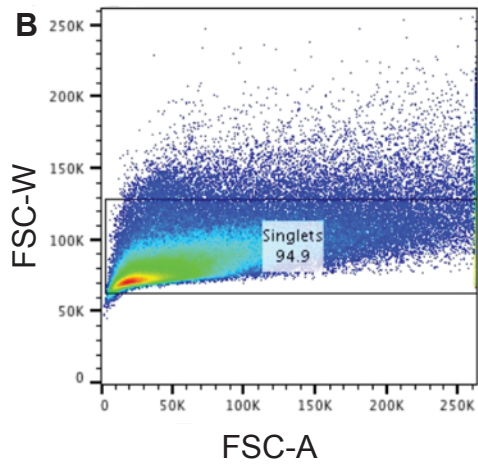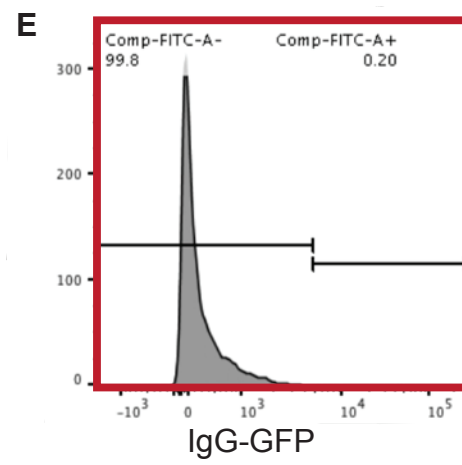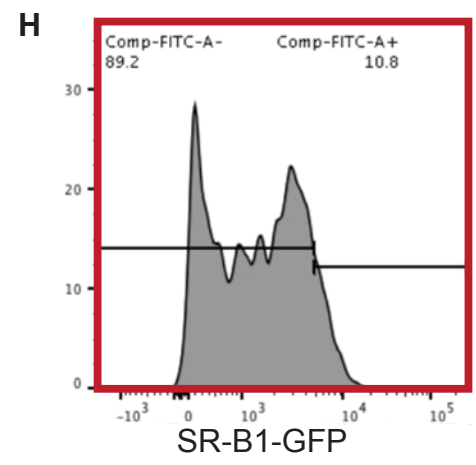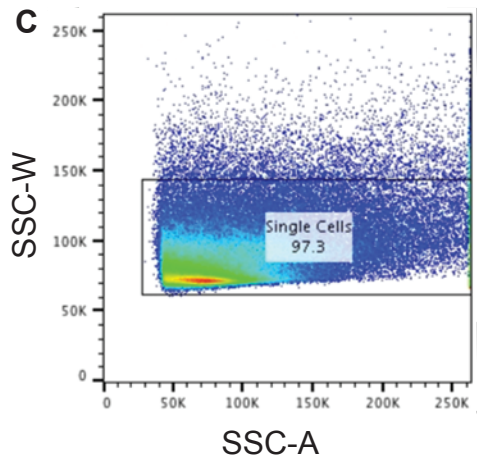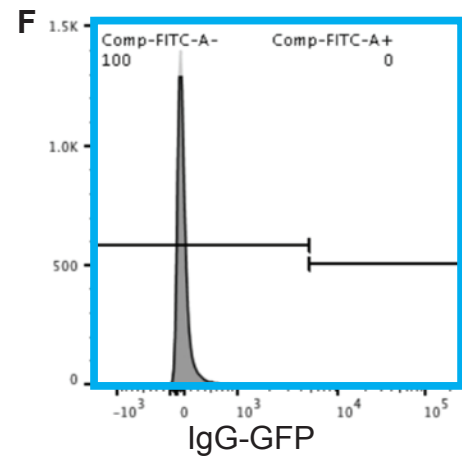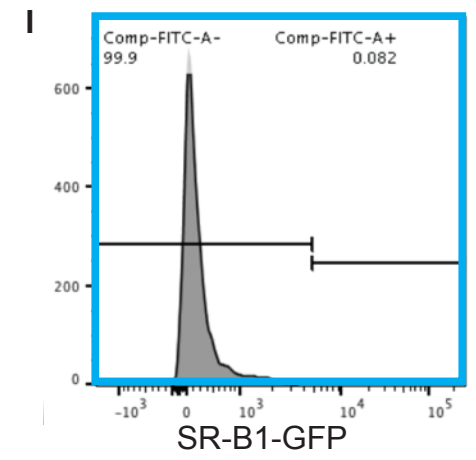

Supplement: supp [file elife_poa_e52551_Figure_5_figure_supplement_2.pdf › elife_poa_e52551_Figure_5_figure_supplement_2.pdf]

Supplemental Figure 5

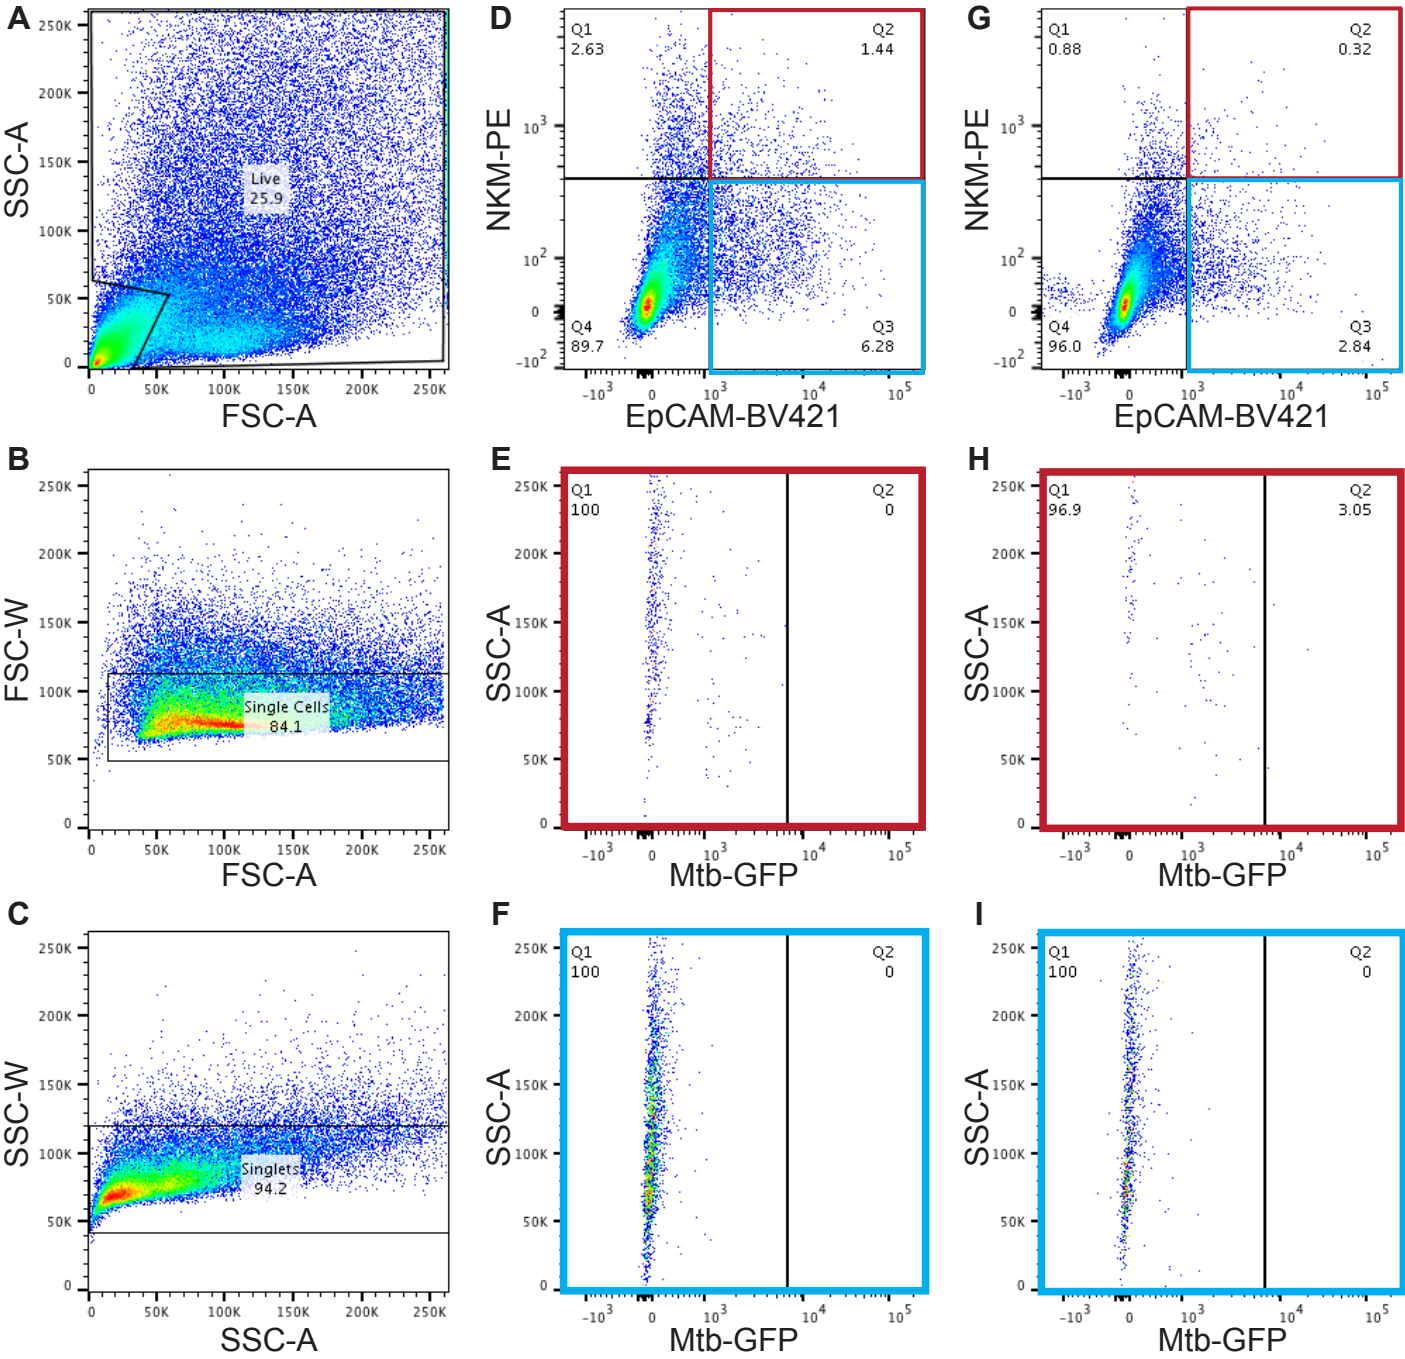

Supplement: supp [file elife_poa_e52551_Figure_5_figure_supplement_3.pdf › elife_poa_e52551_Figure_5_figure_supplement_3.pdf]
